# Supplementary material for: Nomograms Based on Serum N-glycome for Diagnosis of Papillary Thyroid Microcarcinoma and Prediction of Lymph Node Metastasis
Source: MDPI journal article supplement (doi:10.3390/curroncol29090474), 2022-08-23
Supplement: s1 [file s1]

*Supplementary Material*

# Nomograms Based on Serum N-glycome for Diagnosis of Papillary Thyroid Microcarcinoma and Prediction of Lymph Node Metastasis

Zejian Zhang <sup>1,†</sup>, Zhen Cao <sup>2,†</sup>, Rui Liu<sup>2</sup>, Zepeng Li <sup>3</sup>, Jianqiang Wu <sup>1</sup>, Xiaoli Liu <sup>4</sup>, Mengwei Wu <sup>2</sup>, Xiequn Xu<sup>2,\*</sup> and Ziwen Liu <sup>2,\*</sup>

<sup>1</sup> Department of Medical Research Center, State Key Laboratory of Complex Severe and Rare Diseases, Peking Union Medical College Hospital, Chinese Academy of Medical Sciences and Peking Union Medical College, Beijing 100730, China

<sup>2</sup> Department of General Surgery, Peking Union Medical College Hospital, Chinese Academy of Medical Sciences and Peking Union Medical College, Beijing 100730, China

<sup>3</sup> Department of Clinical Laboratory, Peking Union Medical College Hospital, Chinese Academy of Medical Sciences and Peking Union Medical College, Beijing 100730, China

<sup>4</sup> Department of Hernia and Abdominal Wall Surgery, Beijing Chao-Yang Hospital, Capital Medical University, Beijing 100043, China

\* Correspondence: xxq75@163.com (X.-Q. X); Tel.: +86-010-69152620; liuziwen@pumch.cn (Z.-W. L.); Tel.: +86-010-69152620.

† These authors equally contributed to this work.

## Detailed Protocols

### Serum N-glycome Detection and MS Data Processing

A total of 180 serum samples from the cohort (100 PTMC and 80 HC) and 17 quality control samples (5 blanks and 12 replicated serum standards) were randomly distributed into three 96-well plates. According to the protocol described previously, serum glycoproteins from the samples were enzymatically treated to release *N*-glycans [28]. Briefly, 10  $\mu$ l of 2% sodium dodecyl sulfonate was added to 5  $\mu$ l of serum specimen, and then the mixture was incubated for 10 min at 60 °C. The process of *N*-glycan release was performed by the addition of 10  $\mu$ l of the mixture (2% Nonidet P-40, 2.5  $\times$  phosphate-buffered salines, and 1 U PNGase F), followed by incubation at 37 °C overnight. For better discrimination of linkage-specific sialic acids located at the non-reducing ends of glycans,  $\alpha$ -2,3- linked sialic acids were lactonized and  $\alpha$ -2,6-linked sialic acids were ethyl-esterified, permitting mass-based distinction among the sialic-acid linkage variants [28]. In short, 1  $\mu$ l of release mixture was added to 20  $\mu$ l of derivatization reagent (250 mM 1-ethyl-3-(3-dimethylaminopropyl)-carbodiimide and 250 mM hydroxybenzotriazole in ethanol), followed by incubation for 1 h at 37 °C. The derivatized *N*-glycans were then purified by hydrophilic interaction liquid chromatography solid-phase extraction (HILIC-SPE) micro-tips using cotton thread as the stationary phase packed in the pipette tips and enriched glycans were eventually eluted with MilliQ water according to the previously reported method [26,29,30]. HILIC-SPE cotton tips allowed the removal of salts, most deglycosylated peptides, and detergents from glycoconjugate samples. Additionally, subsequent MALDI-TOF MS glycan profiles were very repeatable with different tips. The sialylated *N*-glycans were detected simultaneously with non-sialylated *N*-glycans using MALDI-TOF MS in positive-ion mode. Whereafter, 1  $\mu$ l of purified glycans were mixed with 1  $\mu$ l of the matrix (5 mg/ml super-2,5-dihydroxybenzoic acid in 50% acetonitrile with 1 mM NaOH) on a target plate and were air-dried at room temperature. The state-of-the-art and high-resolution MS platform (rapifleXtreme MALDI-TOF mass spectrometer) was employed to measure the purified glycans. The instrument was equipped with a Smartbeam-3D laser and was controlled by flexControl 4.0 software (Bruker Daltonics). The equipment was calibrated by external calibrants (Bruker Peptide Calibration Standard II). The mass range of measurements was set to 1,000–5,000 *m/z*. For each spot, 5,000 laser shots were accumulated in random walking mode at a laser frequency of 5,000 Hz.

The raw MS data were processed according to the workflow reported in the previous study [28–30]. The raw MS data had been deposited in GlycoPOST (ID: GPST000252) [31]. Briefly, the raw data were smoothed with Savitzky Golay algorithm by flexAnalysis software, baseline corrected with the TopHat method, and transformed to .XY files using the software of flexAnalysis (Bruker Daltonics). Transformed .XY files were then re-calibrated using internally developed MassyTools software (version 0.1.8.1.2) using a selection of well-known high-intensity glycan signals distributed across the detected *m/z* rang (minimum five calibrants at *S/N* > 9) [32]. The peaks of MS spectra were manually assigned to *N*-glycan compositions using the GlycoPeakfinder tool of GlycoWorkbench [33,34]. It used data from single MS measurements to estimate the quantities and classed of monosaccharide components of the glycan structures. It generates only the *N*-linked glycans possibly synthesized by mammalian cells using a set of archetypal structures and a set of rules for the modification of said structures. The *N*-glycan compositions were also confirmed by previous literature [25,28,29]. Briefly, peaks (isotope clusters) with a signal-to-noise ratio (*S/N*) above nine and good isotopic patterns were listed. Next, the peaks of MS spectra (analytes) were manually assigned to *N*-glycan structures. These peaks (analytes) were annotated with glycan compositions in GlycoWorkbench (version 2.1 stable build 146) using the GlycoPeakfinder tool. The generated glycan compositions were then confirmed and validated by previous literature. Finally, the composition list of 131 putative *N*-glycan compositions was generated for subsequent targeted data extraction. The peak intensities of putative glycan composition were extracted as peak areas (background-corrected) by the composition list and MassyTools. The extracted data were further processed in Microsoft Excel. In the furthering process, 35 out of 131 glycan compositions were excluded after applying the cut-offs of *S/N* > 9, ppm error < 20, QC score < 25%, and the minimum percentage (>50%) of presence in all spectra of PTMC, HC, or quality control serum samples [29]. After the curation, 96/131 *N*-glycan compositions met the

quality criteria and were included in quantitative analysis (Supplementary Table S1). At last, the sum of glycan areas per spectrum was re-scaled to 1 to assess relative intensities. To explore the exact role of a group of *N*-glycans with similar glycan structures and to explain their biological effects, such as the number of antennae of complex type *N*-glycans (CA), the level of bisection (B), fucosylation (F), galactosylation (G) and sialylation (S), 91 derived *N*-glycan traits were calculated from the 96 directly detected *N*-glycan traits based on their common structural characteristics. The formulas used for the calculation of derived glycan traits are given in Supplementary Table S2. The calculations were implemented in RStudio. Aberrant derived glycan traits indicate that changes in glycosylation are shared by a series of structurally related *N*-glycans [29].

The average value, standard deviation (SD), and coefficient of variance (CV) of the 12 replicated standard samples were calculated for directly detected and derived glycan traits to evaluate the quality of the data (Supplementary Table S3).

## References

- [25] Zhang, Z., K. R. Reiding, J. Wu, Z. Li, and X. Xu. "Distinguishing Benign and Malignant Thyroid Nodules and Identifying Lymph Node Metastasis in Papillary Thyroid Cancer by Plasma N-Glycomics." *Front. Endocrinol.* **2021**, *12*, 692910.
- [26] Vreeker, G. C. M., R. G. Hanna-Sawires, Y. Mohammed, M. R. Bladergroen, S. Nicolardi, V. Dotz, J. Nouta, B. A. Bonsing, W. E. Mesker, Y. E. M. van der Burgt, M. Wuhrer, and Raem Tollenaar. "Serum N-Glycome Analysis Reveals Pancreatic Cancer Disease Signatures." *Cancer Med.* **2020**, *9*, 8519–8529.
- [28] Reiding, K. R., D. Blank, D. M. Kuijper, A. M. Deelder, and M. Wuhrer. "High-Throughput Profiling of Protein N-Glycosylation by Maldi-Tof-Ms Employing Linkage-Specific Sialic Acid Esterification." *Anal. Chem.* **2014**, *86*, 5784–93.
- [29] Zhang, Z., M. Westhrin, A. Bondt, M. Wuhrer, T. Standal, and S. Holst. "Serum Protein N-Glycosylation Changes in Multiple Myeloma." *Biochim. Biophys. Acta Gen. Subj.* **2019**, *1863*, 960–970.
- [30] Zhang, Z., J. Wu, P. Liu, L. Kang, and X. Xu. "Diagnostic Potential of Plasma Igg N-Glycans in Discriminating Thyroid Cancer from Benign Thyroid Nodules and Healthy Controls." *Front. Oncol.* **2021**, *11*, 658223.
- [31] Watanabe, Y., K. F. Aoki-Kinoshita, Y. Ishihama, and S. Okuda. "Glycopost Realizes Fair Principles for Glycomics Mass Spectrometry Data." *Nucleic Acids Res.* **2021**, *49*, D1523–D1528.
- [32] Jansen, B. C., K. R. Reiding, A. Bondt, A. L. Hipgrave Ederveen, M. Palmblad, D. Falck, and M. Wuhrer. "Massytools: A High-Throughput Targeted Data Processing Tool for Relative Quantitation and Quality Control Developed for Glycomic and Glycoproteomic Maldi-Ms." *J. Proteome Res.* **2015**, *14*, 5088–5098.
- [33] Maass, K., R. Ranzinger, H. Geyer, C. W. von der Lieth, and R. Geyer. "'Glyco-Peakfinder'--De Novo Composition Analysis of Glycoconjugates." *Proteomics* **2007**, *7*, 4435–4444.
- [34] Ceroni, A., K. Maass, H. Geyer, R. Geyer, A. Dell, and S. M. Haslam. "Glycoworkbench: A Tool for the Computer-Assisted Annotation of Mass Spectra of Glycans." *J. Proteome Res.* **2008**, *7*, 1650–1659.

## Supplemental Tables

**Table S1.** The general view of directly detected glycans. Compositions were detected by MALDI-TOF-MS after ethyl esterification. All species are assigned  $[M+Na]^+$ . H = hexose; N = N-acetylhexosamine; F = deoxyhexose (fucose); L = lactonized N-acetylneuraminic acid ( $\alpha$ 2,3-linked); E = ethyl esterified N-acetylneuraminic acid ( $\alpha$ 2,6-linked).

| Observed m/z | Input composition |         |         |         |         | Modifiers composition |                 |         | Calculated |          | Error       |              |
|--------------|-------------------|---------|---------|---------|---------|-----------------------|-----------------|---------|------------|----------|-------------|--------------|
|              | H                 | N       | F       | L       | E       | H <sub>2</sub> O      | Na <sup>+</sup> | Ac      | Traits     | Mass     | error (Da)  | error (ppm)  |
|              | 162.053           | 203.079 | 146.058 | 273.085 | 319.127 | 18.0106               | 22.9892         | 42.0106 |            |          |             |              |
| 1136.389     | 3                 | 3       | 0       | 0       | 0       | 1                     | 1               | 0       | H3N3       | 1136.396 | -0.00701832 | -6.175948037 |
| 1257.423     | 5                 | 2       | 0       | 0       | 0       | 1                     | 1               | 0       | H5N2       | 1257.423 | 0.000575309 | 0.457530569  |
| 1282.461     | 3                 | 3       | 1       | 0       | 0       | 1                     | 1               | 0       | H3N3F1     | 1282.454 | 0.006860206 | 5.349279562  |
| 1298.443     | 4                 | 3       | 0       | 0       | 0       | 1                     | 1               | 0       | H4N3       | 1298.449 | -0.00615251 | -4.738353335 |
| 1339.473     | 3                 | 4       | 0       | 0       | 0       | 1                     | 1               | 0       | H3N4       | 1339.476 | -0.00311986 | -2.329165751 |
| 1419.473     | 6                 | 2       | 0       | 0       | 0       | 1                     | 1               | 0       | H6N2       | 1419.475 | -0.00234941 | -1.655124938 |
| 1444.503     | 4                 | 3       | 1       | 0       | 0       | 1                     | 1               | 0       | H4N3F1     | 1444.507 | -0.00364159 | -2.520993062 |
| 1455.526     | 3                 | 3       | 0       | 0       | 1       | 1                     | 1               | 0       | H3N3E1     | 1455.523 | 0.003056084 | 2.099646409  |
| 1460.493     | 5                 | 3       | 0       | 0       | 0       | 1                     | 1               | 0       | H5N3       | 1460.502 | -0.00902302 | -6.178025033 |
| 1485.531     | 3                 | 4       | 1       | 0       | 0       | 1                     | 1               | 0       | H3N4F1     | 1485.534 | -0.00246156 | -1.657020892 |
| 1501.523     | 4                 | 4       | 0       | 0       | 0       | 1                     | 1               | 0       | H4N4       | 1501.529 | -0.0059364  | -3.953570223 |
| 1542.557     | 3                 | 5       | 0       | 0       | 0       | 1                     | 1               | 0       | H3N5       | 1542.555 | 0.001910484 | 1.238519037  |
| 1581.53      | 7                 | 2       | 0       | 0       | 0       | 1                     | 1               | 0       | H7N2       | 1581.528 | 0.001989074 | 1.257691327  |
| 1601.583     | 3                 | 3       | 1       | 0       | 1       | 1                     | 1               | 0       | H3N3F1E1   | 1601.581 | 0.00230257  | 1.437685582  |
| 1606.564     | 5                 | 3       | 1       | 0       | 0       | 1                     | 1               | 0       | H5N3F1     | 1606.56  | 0.004119532 | 2.564194616  |
| 1617.57      | 4                 | 3       | 0       | 0       | 1       | 1                     | 1               | 0       | H4N3E1     | 1617.576 | -0.00543612 | -3.360657504 |
| 1622.556     | 6                 | 3       | 0       | 0       | 0       | 1                     | 1               | 0       | H6N3       | 1622.555 | 0.001369247 | 0.843883068  |
| 1631.582     | 3                 | 4       | 2       | 0       | 0       | 1                     | 1               | 0       | H3N4F2     | 1631.592 | -0.00983831 | -6.029883037 |
| 1647.582     | 4                 | 4       | 1       | 0       | 0       | 1                     | 1               | 0       | H4N4F1     | 1647.586 | -0.00464598 | -2.819867875 |
| 1663.582     | 5                 | 4       | 0       | 0       | 0       | 1                     | 1               | 0       | H5N4       | 1663.581 | 0.000509927 | 0.306523547  |
| 1688.605     | 3                 | 5       | 1       | 0       | 0       | 1                     | 1               | 0       | H3N5F1     | 1688.613 | -0.00765126 | -4.531091326 |
| 1701.594     | 3                 | 3       | 2       | 1       | 0       | 1                     | 1               | 0       | H3N3F2L1   | 1701.597 | -0.00349439 | -2.053594502 |
| 1704.605     | 4                 | 5       | 0       | 0       | 0       | 1                     | 1               | 0       | H4N5       | 1704.608 | -0.00258875 | -1.518680318 |
| 1717.594     | 4                 | 3       | 1       | 1       | 0       | 1                     | 1               | 0       | H4N3F1L1   | 1717.592 | 0.002538478 | 1.477928421  |
| 1733.591     | 5                 | 3       | 0       | 1       | 0       | 1                     | 1               | 0       | H5N3L1     | 1733.587 | 0.004535191 | 2.616073918  |
| 1743.583     | 8                 | 2       | 0       | 0       | 0       | 1                     | 1               | 0       | H8N2       | 1743.581 | 0.001590847 | 0.912401903  |
| 1763.63      | 4                 | 3       | 1       | 0       | 1       | 1                     | 1               | 0       | H4N3F1E1   | 1763.634 | -0.00355768 | -2.01724669  |
| 1774.617     | 4                 | 4       | 0       | 1       | 0       | 1                     | 1               | 0       | H4N4L1     | 1774.613 | 0.004027614 | 2.269572427  |
| 1779.638     | 5                 | 3       | 0       | 0       | 1       | 1                     | 1               | 0       | H5N3E1     | 1779.629 | 0.009333405 | 5.244580056  |
| 1804.662     | 3                 | 4       | 1       | 0       | 1       | 1                     | 1               | 0       | H3N4F1E1   | 1804.66  | 0.0017589   | 0.974643256  |
| 1809.644     | 5                 | 4       | 1       | 0       | 0       | 1                     | 1               | 0       | H5N4F1     | 1809.639 | 0.004431856 | 2.449027509  |

|          |   |   |   |   |   |   |   |   |            |          |             |              |
|----------|---|---|---|---|---|---|---|---|------------|----------|-------------|--------------|
| 1820.65  | 4 | 4 | 0 | 0 | 1 | 1 | 1 | 0 | H4N4E1     | 1820.655 | -0.00544184 | -2.988947712 |
| 1850.668 | 4 | 5 | 1 | 0 | 0 | 1 | 1 | 0 | H4N5F1     | 1850.666 | 0.002480382 | 1.340264678  |
| 1866.652 | 5 | 5 | 0 | 0 | 0 | 1 | 1 | 0 | H5N5       | 1866.661 | -0.00882467 | -4.727519116 |
| 1879.642 | 5 | 3 | 1 | 1 | 0 | 1 | 1 | 0 | H5N3F1L1   | 1879.645 | -0.00299704 | -1.594472871 |
| 1895.645 | 6 | 3 | 0 | 1 | 0 | 1 | 1 | 0 | H6N3L1     | 1895.64  | 0.005630157 | 2.9700563    |
| 1905.626 | 9 | 2 | 0 | 0 | 0 | 1 | 1 | 0 | H9N2       | 1905.634 | -0.00752287 | -3.947699528 |
| 1936.659 | 5 | 4 | 0 | 1 | 0 | 1 | 1 | 0 | H5N4L1     | 1936.666 | -0.0068224  | -3.522752224 |
| 1941.672 | 6 | 3 | 0 | 0 | 1 | 1 | 1 | 0 | H6N3E1     | 1941.682 | -0.00963158 | -4.960432549 |
| 1966.702 | 4 | 4 | 1 | 0 | 1 | 1 | 1 | 0 | H4N4F1E1   | 1966.713 | -0.01078379 | -5.483152328 |
| 1982.709 | 5 | 4 | 0 | 0 | 1 | 1 | 1 | 0 | H5N4E1     | 1982.708 | 0.000644831 | 0.325227322  |
| 2012.72  | 5 | 5 | 1 | 0 | 0 | 1 | 1 | 0 | H5N5F1     | 2012.719 | 0.00087556  | 0.435013532  |
| 2023.723 | 4 | 5 | 0 | 0 | 1 | 1 | 1 | 0 | H4N5E1     | 2023.735 | -0.01131597 | -5.591627877 |
| 2082.724 | 5 | 4 | 1 | 1 | 0 | 1 | 1 | 0 | H5N4F1L1   | 2082.724 | -0.00057709 | -0.277082378 |
| 2093.742 | 4 | 4 | 0 | 1 | 1 | 1 | 1 | 0 | H4N4L1E1   | 2093.74  | 0.002119956 | 1.01252091   |
| 2128.767 | 5 | 4 | 1 | 0 | 1 | 1 | 1 | 0 | H5N4F1E1   | 2128.766 | 0.000933599 | 0.438563553  |
| 2169.786 | 4 | 5 | 1 | 0 | 1 | 1 | 1 | 0 | H4N5F1E1   | 2169.793 | -0.00688035 | -3.170972408 |
| 2177.758 | 3 | 4 | 2 | 2 | 0 | 1 | 1 | 0 | H3N4F2L2   | 2177.761 | -0.00363124 | -1.667416974 |
| 2185.791 | 5 | 5 | 0 | 0 | 1 | 1 | 1 | 0 | H5N5E1     | 2185.787 | 0.003085815 | 1.411763319  |
| 2255.783 | 5 | 4 | 0 | 1 | 1 | 1 | 1 | 0 | H5N4L1E1   | 2255.793 | -0.01008956 | -4.472735009 |
| 2280.812 | 3 | 5 | 1 | 1 | 1 | 1 | 1 | 0 | H3N5F1L1E1 | 2280.825 | -0.01236064 | -5.419372943 |
| 2285.838 | 4 | 4 | 1 | 0 | 2 | 1 | 1 | 0 | H4N4F1E2   | 2285.84  | -0.00141738 | -0.620070567 |
| 2301.852 | 5 | 4 | 0 | 0 | 2 | 1 | 1 | 0 | H5N4E2     | 2301.835 | 0.017283099 | 7.508400844  |
| 2331.843 | 5 | 5 | 1 | 0 | 1 | 1 | 1 | 0 | H5N5F1E1   | 2331.845 | -0.00284624 | -1.220594544 |
| 2339.806 | 4 | 4 | 2 | 2 | 0 | 1 | 1 | 0 | H4N4F2L2   | 2339.814 | -0.00777974 | -3.324937397 |
| 2347.854 | 6 | 5 | 0 | 0 | 1 | 1 | 1 | 0 | H6N5E1     | 2347.84  | 0.013749711 | 5.856323136  |
| 2355.822 | 5 | 4 | 1 | 2 | 0 | 1 | 1 | 0 | H5N4F1L2   | 2355.809 | 0.012797436 | 5.432289087  |
| 2372.874 | 4 | 6 | 1 | 0 | 1 | 1 | 1 | 0 | H4N6F1E1   | 2372.872 | 0.00215211  | 0.906964111  |
| 2385.833 | 4 | 4 | 2 | 1 | 1 | 1 | 1 | 0 | H4N4F2L1E1 | 2385.856 | -0.02295117 | -9.619677705 |
| 2401.84  | 5 | 4 | 1 | 1 | 1 | 1 | 1 | 0 | H5N4F1L1E1 | 2401.851 | -0.01047759 | -4.362298422 |
| 2429.894 | 4 | 7 | 0 | 0 | 1 | 1 | 1 | 0 | H4N7E1     | 2429.893 | 0.000323666 | 0.133201765  |
| 2447.902 | 5 | 4 | 1 | 0 | 2 | 1 | 1 | 0 | H5N4F1E2   | 2447.893 | 0.008938643 | 3.651566502  |
| 2493.898 | 6 | 5 | 1 | 0 | 1 | 1 | 1 | 0 | H6N5F1E1   | 2493.898 | -0.00055004 | -0.22055587  |
| 2504.924 | 5 | 5 | 0 | 0 | 2 | 1 | 1 | 0 | H5N5E2     | 2504.914 | 0.009500801 | 3.792864872  |
| 2542.892 | 4 | 5 | 2 | 2 | 0 | 1 | 1 | 0 | H4N5F2L2   | 2542.893 | -0.00166172 | -0.653477145 |
| 2620.942 | 6 | 5 | 0 | 1 | 1 | 1 | 1 | 0 | H6N5L1E1   | 2620.925 | 0.016819697 | 6.417465758  |
| 2650.964 | 5 | 5 | 1 | 0 | 2 | 1 | 1 | 0 | H5N5F1E2   | 2650.972 | -0.00806371 | -3.041792284 |
| 2666.971 | 6 | 5 | 0 | 0 | 2 | 1 | 1 | 0 | H6N5E2     | 2666.967 | 0.003805836 | 1.427027717  |
| 2704.947 | 5 | 5 | 2 | 2 | 0 | 1 | 1 | 0 | H5N5F2L2   | 2704.946 | 0.000765752 | 0.283093381  |
| 2712.975 | 7 | 6 | 0 | 0 | 1 | 1 | 1 | 0 | H7N6E1     | 2712.973 | 0.002880936 | 1.061911147  |
| 2720.941 | 6 | 5 | 1 | 2 | 0 | 1 | 1 | 0 | H6N5F1L2   | 2720.941 | -0.00048497 | -0.178235572 |
| 2758.997 | 8 | 7 | 0 | 0 | 0 | 1 | 1 | 0 | H8N7       | 2758.978 | 0.018651141 | 6.760162974  |

|          |   |   |   |   |   |   |   |   |            |          |             |              |
|----------|---|---|---|---|---|---|---|---|------------|----------|-------------|--------------|
| 2766.979 | 6 | 5 | 1 | 1 | 1 | 1 | 1 | 0 | H6N5F1L1E1 | 2766.983 | -0.00415612 | -1.502041968 |
| 2813.022 | 6 | 5 | 1 | 0 | 2 | 1 | 1 | 0 | H6N5F1E2   | 2813.025 | -0.00313008 | -1.112709047 |
| 2894.01  | 6 | 5 | 0 | 2 | 1 | 1 | 1 | 0 | H6N5L2E1   | 2894.01  | 0.000277577 | 0.095914226  |
| 2940.055 | 6 | 5 | 0 | 1 | 2 | 1 | 1 | 0 | H6N5L1E2   | 2940.052 | 0.003470376 | 1.180379336  |
| 2986.097 | 6 | 5 | 0 | 0 | 3 | 1 | 1 | 0 | H6N5E3     | 2986.094 | 0.00336213  | 1.125929205  |
| 2994.008 | 6 | 5 | 1 | 3 | 0 | 1 | 1 | 0 | H6N5F1L3   | 2994.026 | -0.0179145  | -5.983414955 |
| 3032.102 | 7 | 6 | 0 | 0 | 2 | 1 | 1 | 0 | H7N6E2     | 3032.099 | 0.00234704  | 0.774064478  |
| 3040.073 | 6 | 5 | 1 | 2 | 1 | 1 | 1 | 0 | H6N5F1L2E1 | 3040.068 | 0.00461779  | 1.518975771  |
| 3086.117 | 6 | 5 | 1 | 1 | 2 | 1 | 1 | 0 | H6N5F1L1E2 | 3086.11  | 0.006853262 | 2.220679863  |
| 3124.121 | 9 | 8 | 0 | 0 | 0 | 1 | 1 | 0 | H9N8       | 3124.11  | 0.01041013  | 3.332190394  |
| 3132.158 | 6 | 5 | 1 | 0 | 3 | 1 | 1 | 0 | H6N5F1E3   | 3132.152 | 0.006787482 | 2.167035005  |
| 3232.178 | 6 | 5 | 2 | 1 | 2 | 1 | 1 | 0 | H6N5F2L1E2 | 3232.168 | 0.010198483 | 3.155307634  |
| 3259.15  | 7 | 6 | 0 | 2 | 1 | 1 | 1 | 0 | H7N6L2E1   | 3259.142 | 0.008013    | 2.458622345  |
| 3305.166 | 7 | 6 | 0 | 1 | 2 | 1 | 1 | 0 | H7N6L1E2   | 3305.184 | -0.01817955 | -5.500313056 |
| 3351.227 | 7 | 6 | 0 | 0 | 3 | 1 | 1 | 0 | H7N6E3     | 3351.226 | 0.0013127   | 0.391707409  |
| 3397.243 | 8 | 7 | 0 | 0 | 2 | 1 | 1 | 0 | H8N7E2     | 3397.231 | 0.011902185 | 3.503495644  |
| 3405.206 | 7 | 6 | 1 | 2 | 1 | 1 | 1 | 0 | H7N6F1L2E1 | 3405.2   | 0.005761072 | 1.691845403  |
| 3443.237 | 9 | 8 | 0 | 0 | 1 | 1 | 1 | 0 | H9N8E1     | 3443.237 | 0.000197098 | 0.057241975  |
| 3532.239 | 7 | 6 | 0 | 3 | 1 | 1 | 1 | 0 | H7N6L3E1   | 3532.227 | 0.011649966 | 3.298192883  |
| 3578.275 | 7 | 6 | 0 | 2 | 2 | 1 | 1 | 0 | H7N6L2E2   | 3578.269 | 0.005661174 | 1.582098505  |
| 3624.32  | 7 | 6 | 0 | 1 | 3 | 1 | 1 | 0 | H7N6L1E3   | 3624.311 | 0.009367276 | 2.584567647  |
| 3678.297 | 7 | 6 | 1 | 3 | 1 | 1 | 1 | 0 | H7N6F1L3E1 | 3678.285 | 0.011717035 | 3.185461475  |
| 3724.336 | 7 | 6 | 1 | 2 | 2 | 1 | 1 | 0 | H7N6F1L2E2 | 3724.327 | 0.00876955  | 2.354667257  |
| 4081.498 | 9 | 8 | 0 | 0 | 3 | 1 | 1 | 0 | H9N8E3     | 4081.49  | 0.007251185 | 1.7766023    |

**Table S2. Description and calculation of derived glycan traits.** Within the depictions, divisions have been indicated by braces, and exclusions by a cross, whereas numerical values indicate compositional limitations (i.e. 5-9 as the possible number of mannoses). M = mannose; Hy = hybrid species; T = within total spectrum; C = within complex species; F = deoxyhexose (fucose); G = galactose; S = N-acetylneuraminic acid (sialic acid); E =  $\alpha$ 2,6-linked sialic acid; L =  $\alpha$ 2,3-linked sialic acid; H = hexose (mannose or galactose); N = N-acetylhexosamine (N-acetylglucosamine: GlcNAc).

| Derived trait      | Cartoon illustration | Description                                                             | Formular of calculation                                                                                                                                                                                                                                                                                                                                                                                                                                                                                                                                                                                                                                                                                                                                                                                                                                                                                                                                                                                                 |
|--------------------|----------------------|-------------------------------------------------------------------------|-------------------------------------------------------------------------------------------------------------------------------------------------------------------------------------------------------------------------------------------------------------------------------------------------------------------------------------------------------------------------------------------------------------------------------------------------------------------------------------------------------------------------------------------------------------------------------------------------------------------------------------------------------------------------------------------------------------------------------------------------------------------------------------------------------------------------------------------------------------------------------------------------------------------------------------------------------------------------------------------------------------------------|
| <b>Glycan type</b> |                      |                                                                         |                                                                                                                                                                                                                                                                                                                                                                                                                                                                                                                                                                                                                                                                                                                                                                                                                                                                                                                                                                                                                         |
| TM                 |                      | Relative abundance of high mannose type glycans within total spectrum   | $TM = (H5N2 + H6N2 + H7N2 + H8N2 + H9N2) / (H3N3 + H5N2 + H3N3F1 + H4N3 + H3N4 + H6N2 + H4N3F1 + H3N3E1 + H5N3 + H3N4F1 + H4N4 + H3N5 + H7N2 + H3N3F1E1 + H5N3F1 + H4N3E1 + H6N3 + H3N4F2 + H4N4F1 + H5N4 + H3N5F1 + H3N3F2L1 + H4N5 + H4N3F1L1 + H5N3L1 + H8N2 + H4N3F1E1 + H4N4L1 + H5N3E1 + H3N4F1E1 + H5N4F1 + H4N4E1 + H4N5F1 + H5N5 + H5N3F1L1 + H6N3L1 + H9N2 + H5N4L1 + H6N3E1 + H4N4F1E1 + H5N4E1 + H5N5F1 + H4N5E1 + H5N4F1L1 + H4N4E1L1 + H5N4F1E1 + H4N5F1E1 + H3N4F2L2 + H5N5E1 + H5N4E1L1 + H3N5F1E1L1 + H4N4F1E2 + H5N4E2 + H5N5F1E1 + H4N4F2L2 + H6N5E1 + H5N4F1L2 + H4N6F1E1 + H4N4F2E1L1 + H5N4F1E1L1 + H4N7E1 + H5N4F1E2 + H6N5F1E1 + H5N5E2 + H4N5F2L2 + H6N5E1L1 + H5N5F1E2 + H6N5E2 + H5N5F2L2 + H7N6E1 + H6N5F1L2 + H8N7 + H6N5F1E1L1 + H6N5F1E2 + H6N5E1L2 + H6N5E2L1 + H6N5E3 + H6N5F1L3 + H7N6E2 + H6N5F1E1L2 + H6N5F1E2L1 + H9N8 + H6N5F1E3 + H6N5F2E2L1 + H7N6E1L2 + H7N6E2L1 + H7N6E3 + H8N7E2 + H7N6F1E1L2 + H9N8E1 + H7N6E1L3 + H7N6E2L2 + H7N6E3L1 + H7N6F1E1L3 + H7N6F1E2L2 + H9N8E3)$ |
| THy                |                      | Relative abundance of hybrid type glycans within total spectrum         | $THy = (H5N3 + H5N3F1 + H6N3 + H5N3L1 + H5N3E1 + H5N3F1L1 + H6N3L1 + H6N3E1) / (H3N3 + H5N2 + H3N3F1 + H4N3 + H3N4 + H6N2 + H4N3F1 + H3N3E1 + H5N3 + H3N4F1 + H4N4 + H3N5 + H7N2 + H3N3F1E1 + H5N3F1 + H4N3E1 + H6N3 + H3N4F2 + H4N4F1 + H5N4 + H3N5F1 + H3N3F2L1 + H4N5 + H4N3F1L1 + H5N3L1 + H8N2 + H4N3F1E1 + H4N4L1 + H5N3E1 + H3N4F1E1 + H5N4F1 + H4N4E1 + H4N5F1 + H5N5 + H5N3F1L1 + H6N3L1 + H9N2 + H5N4L1 + H6N3E1 + H4N4F1E1 + H5N4E1 + H5N5F1 + H4N5E1 + H5N4F1E1 + H4N5F1E1 + H4N4F2L2 + H6N5E1 + H5N4F1L2 + H4N6F1E1 + H4N4F2E1L1 + H5N4F1E1L1 + H4N7E1 + H5N4F1E2 + H6N5F1E1 + H5N5E2 + H4N5F2L2 + H6N5E1L1 + H5N5F1E2 + H6N5E2 + H5N5F2L2 + H7N6E1 + H6N5F1L2 + H8N7 + H6N5F1E1L1 + H6N5F1E2 + H6N5E1L2 + H6N5E2L1 + H6N5E3 + H6N5F1L3 + H7N6E2 + H6N5F1E1L2 + H6N5F1E2L1 + H9N8 + H6N5F1E3 + H6N5F2E2L1 + H7N6E1L2 + H7N6E2L1 + H7N6E3 + H8N7E2 + H7N6F1E1L2 + H9N8E1 + H7N6E1L3 + H7N6E2L2 + H7N6E3L1 + H7N6F1E1L3 + H7N6F1E2L2 + H9N8E3)$                                                              |
| MHy                |                      | The ratio of high-mannose to hybrid glycans                             | $MHy = (H5N2 + H6N2 + H7N2 + H8N2 + H9N2) / (H5N3 + H5N3F1 + H6N3 + H5N3L1 + H5N3E1 + H5N3F1L1 + H6N3L1 + H6N3E1)$                                                                                                                                                                                                                                                                                                                                                                                                                                                                                                                                                                                                                                                                                                                                                                                                                                                                                                      |
| MM                 |                      | Average number of mannoses on high mannose type glycans                 | $MM = (5 * (H5N2) + 6 * (H6N2) + 7 * (H7N2) + 8 * (H8N2) + 9 * (H9N2) + 10 * (0)) / (H5N2 + H6N2 + H7N2 + H8N2 + H9N2)$                                                                                                                                                                                                                                                                                                                                                                                                                                                                                                                                                                                                                                                                                                                                                                                                                                                                                                 |
| CA1                |                      | Relative abundance of monoantennary glycans within complex type glycans | $CA1 = (H3N3E1 + H3N3F1E1 + H4N3E1 + H3N3F2L1 + H4N3F1L1 + H4N3F1E1) / (H3N4 + H3N3E1 + H3N4F1 + H4N4 + H3N5 + H3N3F1E1 + H4N3E1 + H3N4F2 + H4N4F1 + H5N4 + H3N5F1 + H3N3F2L1 + H4N5 + H4N3F1L1 + H4N3F1E1 + H4N4L1 + H3N4F1E1 + H5N4F1 + H4N4E1 + H4N5F1 + H5N5 + H5N4L1 + H4N4F1E1 + H5N4E1 + H5N5F1 + H4N5E1 + H5N4F1L1 + H4N4E1L1 + H5N4F1E1 + H4N5F1E1 + H3N4F2L2 + H5N5E1 + H5N4E1L1 + H3N5F1E1L1 + H4N4F1E2 + H5N4E2 + H5N5F1E1 + H4N4F2L2 + H6N5E1 + H5N4F1L2 + H4N6F1E1 + H4N4F2E1L1 + H5N4F1E1L1 + H4N7E1 + H5N4F1E2 + H6N5F1E1 + H5N5E2 + H4N5F2L2 + H6N5E1L1 + H5N5F1E2 + H6N5E2 + H5N5F2L2 + H7N6E1 + H6N5F1L2 + H8N7 + H6N5F1E1L1 + H6N5F1E2 + H6N5E1L2 + H6N5E2L1 + H6N5E3 + H6N5F1L3 + H7N6E2 + H6N5F1E1L2 + H6N5F1E2L1 + H9N8 + H6N5F1E3 + H6N5F2E2L1 + H7N6E1L2 + H7N6E2L1 + H7N6E3 + H8N7E2 + H7N6F1E1L2 + H9N8E1 + H7N6E1L3 + H7N6E2L2 + H7N6E3L1 + H7N6F1E1L3 + H7N6F1E2L2 + H9N8E3)$                                                                                                              |





|       |                                                                                     |                                                                         |                                                                                                                                                                                                                                                                                                                                                                                                                                                                                                                                                                                                                                                                                                                                                                                                                                                                                                                                                                                                                                                                                                                                                              |
|-------|-------------------------------------------------------------------------------------|-------------------------------------------------------------------------|--------------------------------------------------------------------------------------------------------------------------------------------------------------------------------------------------------------------------------------------------------------------------------------------------------------------------------------------------------------------------------------------------------------------------------------------------------------------------------------------------------------------------------------------------------------------------------------------------------------------------------------------------------------------------------------------------------------------------------------------------------------------------------------------------------------------------------------------------------------------------------------------------------------------------------------------------------------------------------------------------------------------------------------------------------------------------------------------------------------------------------------------------------------|
|       |                                                                                     |                                                                         | $\text{H6N5F1E1L1} + \text{H6N5F1E2} + \text{H6N5E1L2} + \text{H6N5E2L1} + \text{H6N5E3} + \text{H6N5F1L3} + \text{H7N6E2} + \text{H6N5F1E1L2} + \text{H6N5F1E2L1} + \text{H9N8} + \text{H6N5F1E3} + \text{H6N5F2E2L1} + \text{H7N6E1L2} + \text{H7N6E2L1} + \text{H7N6E3} + \text{H8N7E2} + \text{H7N6F1E1L2} + \text{H9N8E1} + \text{H7N6E1L3} + \text{H7N6E2L2} + \text{H7N6E3L1} + \text{H7N6F1E1L3} + \text{H7N6F1E2L2} + \text{H9N8E3}$                                                                                                                                                                                                                                                                                                                                                                                                                                                                                                                                                                                                                                                                                                                |
| A2F   |    | Fucosylation within diantennary glycans                                 | $\text{A2F} = ( \text{H3N4F1} + \text{H3N4F2} + \text{H4N4F1} + \text{H3N5F1} + \text{H3N4F1E1} + \text{H5N4F1} + \text{H4N5F1} + \text{H4N4F1E1} + \text{H5N5F1} + \text{H5N4F1L1} + \text{H5N4F1E1} + \text{H4N5F1E1} + \text{H3N4F2L2} + \text{H3N5F1E1L1} + \text{H4N4F1E2} + \text{H5N5F1E1} + \text{H4N4F2L2} + \text{H5N4F1L2} + \text{H4N4F2E1L1} + \text{H5N4F1E1L1} + \text{H5N4F1E2} + \text{H4N5F2L2} + \text{H5N5F1E2} + \text{H5N5F2L2} ) / ( \text{H3N4} + \text{H3N4F1} + \text{H4N4} + \text{H3N5} + \text{H3N4F2} + \text{H4N4F1} + \text{H5N4} + \text{H3N5F1} + \text{H4N5} + \text{H4N4L1} + \text{H3N4F1E1} + \text{H5N4F1} + \text{H4N4E1} + \text{H4N5F1} + \text{H5N5} + \text{H5N4L1} + \text{H4N4F1E1} + \text{H5N4E1} + \text{H5N5F1} + \text{H4N5E1} + \text{H5N4F1L1} + \text{H4N4E1L1} + \text{H5N4F1E1} + \text{H4N5F1E1} + \text{H3N4F2L2} + \text{H5N5E1} + \text{H5N4E1L1} + \text{H3N5F1E1L1} + \text{H4N4F1E2} + \text{H5N4E2} + \text{H5N5F1E1} + \text{H4N4F2L2} + \text{H5N4F1L2} + \text{H4N4F2E1L1} + \text{H5N4F1E1L1} + \text{H5N4F1E2} + \text{H5N5E2} + \text{H4N5F2L2} + \text{H5N5F1E2} + \text{H5N5F2L2} )$ |
| A3F   |    | Fucosylation within triantennary glycans                                | $\text{A3F} = ( \text{H6N5F1E1} + \text{H6N5F1L2} + \text{H6N5F1E1L1} + \text{H6N5F1E2} + \text{H6N5F1L3} + \text{H6N5F1E1L2} + \text{H6N5F1E2L1} + \text{H6N5F1E3} + \text{H6N5F2E2L1} ) / ( \text{H6N5E1} + \text{H6N5F1E1} + \text{H6N5E1L1} + \text{H6N5E2} + \text{H6N5F1L2} + \text{H6N5F1E1L1} + \text{H6N5F1E2} + \text{H6N5E1L2} + \text{H6N5E2L1} + \text{H6N5E3} + \text{H6N5F1L3} + \text{H6N5F1E1L2} + \text{H6N5F1E2L1} + \text{H6N5F1E3} + \text{H6N5F2E2L1} )$                                                                                                                                                                                                                                                                                                                                                                                                                                                                                                                                                                                                                                                                               |
| A4F   |    | Fucosylation within tetra-antennary glycans                             | $\text{A4F} = ( \text{H4N6F1E1} + \text{H7N6F1E1L2} + \text{H7N6F1E1L3} + \text{H7N6F1E2L2} ) / ( \text{H4N6F1E1} + \text{H7N6E1} + \text{H7N6E2} + \text{H7N6E1L2} + \text{H7N6E2L1} + \text{H7N6E3} + \text{H7N6F1E1L2} + \text{H7N6E1L3} + \text{H7N6E2L2} + \text{H7N6E3L1} + \text{H7N6F1E1L3} + \text{H7N6F1E2L2} )$                                                                                                                                                                                                                                                                                                                                                                                                                                                                                                                                                                                                                                                                                                                                                                                                                                   |
| A2SF  |    | Fucosylation within sialylated diantennary glycans                      | $\text{A2SF} = ( \text{H3N4F1E1} + \text{H4N4F1E1} + \text{H5N4F1L1} + \text{H5N4F1E1} + \text{H4N5F1E1} + \text{H3N4F2L2} + \text{H3N5F1E1L1} + \text{H4N4F1E2} + \text{H5N5F1E1} + \text{H4N4F2L2} + \text{H5N4F1L2} + \text{H4N4F2E1L1} + \text{H5N4F1E1L1} + \text{H5N4F1E2} + \text{H4N5F2L2} + \text{H5N5F1E2} + \text{H5N5F2L2} ) / ( \text{H4N4L1} + \text{H3N4F1E1} + \text{H4N4E1} + \text{H5N4L1} + \text{H4N4F1E1} + \text{H5N4E1} + \text{H4N5E1} + \text{H5N4F1L1} + \text{H4N4E1L1} + \text{H5N4F1E1} + \text{H4N5F1E1} + \text{H3N4F2L2} + \text{H5N5E1} + \text{H5N4E1L1} + \text{H3N5F1E1L1} + \text{H4N4F1E2} + \text{H5N4E2} + \text{H5N5F1E1} + \text{H4N4F2L2} + \text{H5N4F1L2} + \text{H4N4F2E1L1} + \text{H5N4F1E1L1} + \text{H5N4F1E2} + \text{H5N5E2} + \text{H4N5F2L2} + \text{H5N5F1E2} + \text{H5N5F2L2} )$                                                                                                                                                                                                                                                                                                                    |
| A2S0F |    | Fucosylation within non-sialylated diantennary glycans                  | $\text{A2S0F} = ( \text{H3N4F1} + \text{H3N4F2} + \text{H4N4F1} + \text{H3N5F1} + \text{H5N4F1} + \text{H4N5F1} + \text{H5N5F1} ) / ( \text{H3N4} + \text{H3N4F1} + \text{H4N4} + \text{H3N5} + \text{H3N4F2} + \text{H4N4F1} + \text{H5N4} + \text{H3N5F1} + \text{H4N5} + \text{H5N4F1} + \text{H4N5F1} + \text{H5N5} + \text{H5N5F1} )$                                                                                                                                                                                                                                                                                                                                                                                                                                                                                                                                                                                                                                                                                                                                                                                                                   |
| A2EF  |   | Fucosylation within diantennary glycans with α2,6-linked sialic acid    | $\text{A2EF} = ( \text{H3N4F1E1} + \text{H4N4F1E1} + \text{H5N4F1E1} + \text{H4N5F1E1} + \text{H3N5F1E1L1} + \text{H4N4F1E2} + \text{H5N5F1E1} + \text{H4N4F2E1L1} + \text{H5N4F1E1L1} + \text{H5N4F1E2} + \text{H5N5F1E2} ) / ( \text{H3N4F1E1} + \text{H4N4E1} + \text{H4N4F1E1} + \text{H5N4E1} + \text{H4N5E1} + \text{H4N4E1L1} + \text{H5N4F1E1} + \text{H4N5F1E1} + \text{H5N5E1} + \text{H5N4E1L1} + \text{H3N5F1E1L1} + \text{H4N4F1E2} + \text{H5N4E2} + \text{H5N5F1E1} + \text{H4N4F2E1L1} + \text{H5N4F1E1L1} + \text{H5N4F1E2} + \text{H5N5E2} + \text{H5N5F1E2} )$                                                                                                                                                                                                                                                                                                                                                                                                                                                                                                                                                                            |
| A2E0F |  | Fucosylation within diantennary glycans without α2,6-linked sialic acid | $\text{A2E0F} = ( \text{H3N4F1} + \text{H3N4F2} + \text{H4N4F1} + \text{H3N5F1} + \text{H5N4F1} + \text{H4N5F1} + \text{H5N5F1} + \text{H5N4F1L1} + \text{H3N4F2L2} + \text{H4N4F2L2} + \text{H5N4F1L2} + \text{H4N5F2L2} + \text{H5N5F2L2} ) / ( \text{H3N4} + \text{H3N4F1} + \text{H4N4} + \text{H3N5} + \text{H3N4F2} + \text{H4N4F1} + \text{H5N4} + \text{H3N5F1} + \text{H4N5} + \text{H4N4L1} + \text{H5N4F1} + \text{H4N5F1} + \text{H5N5} + \text{H5N4L1} + \text{H5N5F1} + \text{H5N4F1L1} + \text{H3N4F2L2} + \text{H4N4F2L2} + \text{H5N4F1L2} + \text{H4N5F2L2} + \text{H5N5F2L2} )$                                                                                                                                                                                                                                                                                                                                                                                                                                                                                                                                                           |
| A2LF  |  | Fucosylation within diantennary glycans with α2,3-linked sialic acid    | $\text{A2LF} = ( \text{H5N4F1L1} + \text{H3N4F2L2} + \text{H3N5F1E1L1} + \text{H4N4F2L2} + \text{H5N4F1L2} + \text{H4N4F2E1L1} + \text{H5N4F1E1L1} + \text{H4N5F2L2} + \text{H5N5F2L2} ) / ( \text{H4N4L1} + \text{H5N4L1} + \text{H5N4F1L1} + \text{H4N4E1L1} + \text{H3N4F2L2} + \text{H5N4E1L1} + \text{H3N5F1E1L1} + \text{H4N4F2L2} + \text{H5N4F1L2} + \text{H4N4F2E1L1} + \text{H5N4F1E1L1} + \text{H4N5F2L2} + \text{H5N5F2L2} )$                                                                                                                                                                                                                                                                                                                                                                                                                                                                                                                                                                                                                                                                                                                    |
| A2L0F |  | Fucosylation within diantennary glycans without α2,3-linked sialic acid | $\text{A2L0F} = ( \text{H3N4F1} + \text{H3N4F2} + \text{H4N4F1} + \text{H3N5F1} + \text{H3N4F1E1} + \text{H5N4F1} + \text{H4N5F1} + \text{H4N4F1E1} + \text{H5N5F1} + \text{H5N4F1E1} + \text{H4N5F1E1} + \text{H4N4F1E2} + \text{H5N5F1E1} + \text{H5N4F1E2} + \text{H5N5F1E2} ) / ( \text{H3N4} + \text{H3N4F1} + \text{H4N4} + \text{H3N5} + \text{H3N4F2} + \text{H4N4F1} + \text{H5N4} + \text{H3N5F1} + \text{H4N5} + \text{H3N4F1E1} + \text{H5N4F1} + \text{H4N4E1} + \text{H4N5F1} + \text{H5N5} + \text{H4N4F1E1} + \text{H5N4E1} + \text{H5N5F1} + \text{H4N5E1} + \text{H5N4F1E1} + \text{H4N5F1E1} + \text{H5N5E1} + \text{H4N4F1E2} + \text{H5N4E2} + \text{H5N5F1E1} + \text{H5N4F1E2} + \text{H5N5E2} + \text{H5N5F1E2} )$                                                                                                                                                                                                                                                                                                                                                                                                                   |

|                                    |                                                                                     |                                                                                                                   |                                                                                                                                                                                                                                                                                                                                                                                                                                                                                                                                                                                                                                                                                                                                                                                                                                                                                                                                        |
|------------------------------------|-------------------------------------------------------------------------------------|-------------------------------------------------------------------------------------------------------------------|----------------------------------------------------------------------------------------------------------------------------------------------------------------------------------------------------------------------------------------------------------------------------------------------------------------------------------------------------------------------------------------------------------------------------------------------------------------------------------------------------------------------------------------------------------------------------------------------------------------------------------------------------------------------------------------------------------------------------------------------------------------------------------------------------------------------------------------------------------------------------------------------------------------------------------------|
| A3EF                               |    | Fucosylation within triantennary glycans with $\alpha$ 2,6-linked sialic acid                                     | $A3EF = (H6N5F1E1 + H6N5F1E1L1 + H6N5F1E2 + H6N5F1E1L2 + H6N5F1E2L1 + H6N5F1E3 + H6N5F2E2L1) / (H6N5E1 + H6N5F1E1 + H6N5E1L1 + H6N5E2 + H6N5F1E1L1 + H6N5F1E2 + H6N5E1L2 + H6N5E2L1 + H6N5E3 + H6N5F1E1L2 + H6N5F1E2L1 + H6N5F1E3 + H6N5F2E2L1)$                                                                                                                                                                                                                                                                                                                                                                                                                                                                                                                                                                                                                                                                                       |
| A3LF                               |    | Fucosylation within triantennary glycans with $\alpha$ 2,3-linked sialic acid                                     | $A3LF = (H6N5F1L2 + H6N5F1E1L1 + H6N5F1L3 + H6N5F1E1L2 + H6N5F1E2L1 + H6N5F2E2L1) / (H6N5E1L1 + H6N5F1L2 + H6N5F1E1L1 + H6N5E1L2 + H6N5E2L1 + H6N5F1L3 + H6N5F1E1L2 + H6N5F1E2L1 + H6N5F2E2L1)$                                                                                                                                                                                                                                                                                                                                                                                                                                                                                                                                                                                                                                                                                                                                        |
| A3L0F                              |    | Fucosylation within triantennary glycans without $\alpha$ 2,3-linked sialic acid                                  | $A3L0F = (H6N5F1E1 + H6N5F1E2 + H6N5F1E3) / (H6N5E1 + H6N5F1E1 + H6N5E2 + H6N5F1E2 + H6N5E3 + H6N5F1E3)$                                                                                                                                                                                                                                                                                                                                                                                                                                                                                                                                                                                                                                                                                                                                                                                                                               |
| A4LF                               |    | Fucosylation within tetra-antennary glycans with $\alpha$ 2,3-linked sialic acid                                  | $A4LF = (H7N6F1E1L2 + H7N6F1E1L3 + H7N6F1E2L2) / (H7N6E1L2 + H7N6E2L1 + H7N6F1E1L2 + H7N6E1L3 + H7N6E2L2 + H7N6E3L1 + H7N6F1E1L3 + H7N6F1E2L2)$                                                                                                                                                                                                                                                                                                                                                                                                                                                                                                                                                                                                                                                                                                                                                                                        |
| A4L0F                              |    | Fucosylation within tetra-antennary glycans without $\alpha$ 2,3-linked sialic acid                               | $A4L0F = (H4N6F1E1) / (H4N6F1E1 + H7N6E1 + H7N6E2 + H7N6E3)$                                                                                                                                                                                                                                                                                                                                                                                                                                                                                                                                                                                                                                                                                                                                                                                                                                                                           |
| <b>Antennary fucosylation (Fa)</b> |                                                                                     |                                                                                                                   |                                                                                                                                                                                                                                                                                                                                                                                                                                                                                                                                                                                                                                                                                                                                                                                                                                                                                                                                        |
| CFa                                |    | Relative abundance of species with 2 fucoses (i.e. at least one antennary fucose) within all complex type glycans | $CFa = (H3N4F2 + H3N3F2L1 + H3N4F2L2 + H4N4F2L2 + H4N4F2E1L1 + H4N5F2L2 + H5N5F2L2 + H6N5F2E2L1) / (H3N4 + H3N3E1 + H3N4F1 + H4N4 + H3N5 + H3N3F1E1 + H4N3E1 + H3N4F2 + H4N4F1 + H5N4 + H3N5F1 + H3N3F2L1 + H4N5 + H4N3F1L1 + H4N3F1E1 + H4N4L1 + H3N4F1E1 + H5N4F1 + H4N4E1 + H4N5F1 + H5N5 + H5N4L1 + H4N4F1E1 + H5N4E1 + H5N5F1 + H4N5E1 + H5N4F1L1 + H4N4E1L1 + H5N4F1E1 + H4N5F1E1 + H3N4F2L2 + H5N5E1 + H5N4E1L1 + H3N5F1E1L1 + H4N4F1E2 + H5N4E2 + H5N5F1E1 + H4N4F2L2 + H6N5E1 + H5N4F1L2 + H4N6F1E1 + H4N4F2E1L1 + H5N4F1E1L1 + H4N7E1 + H5N4F1E2 + H6N5F1E1 + H5N5E2 + H4N5F2L2 + H6N5E1L1 + H5N5F1E2 + H6N5E2 + H5N5F2L2 + H7N6E1 + H6N5F1L2 + H8N7 + H6N5F1E1L1 + H6N5F1E2 + H6N5E1L2 + H6N5E2L1 + H6N5E3 + H6N5F1L3 + H7N6E2 + H6N5F1E1L2 + H6N5F1E2L1 + H9N8 + H6N5F1E3 + H6N5F2E2L1 + H7N6E1L2 + H7N6E2L1 + H7N6E3 + H8N7E2 + H7N6F1E1L2 + H9N8E1 + H7N6E1L3 + H7N6E2L2 + H7N6E3L1 + H7N6F1E1L3 + H7N6F1E2L2 + H9N8E3)$ |
| A2Fa                               |  | Relative abundance of species with 2 fucoses (i.e. at least one antennary fucose) within diantennary glycans      | $A2Fa = (H3N4F2 + H3N4F2L2 + H4N4F2L2 + H4N4F2E1L1 + H4N5F2L2 + H5N5F2L2) / (H3N4 + H3N4F1 + H4N4 + H3N5 + H3N4F2 + H4N4F1 + H5N4 + H3N5F1 + H4N4E1 + H4N5F1 + H5N5 + H5N4L1 + H4N4F1E1 + H5N4E1 + H5N5F1 + H4N5E1 + H5N4F1L1 + H4N4E1L1 + H5N4F1E1 + H4N5F1E1 + H3N4F2L2 + H5N5E1 + H5N4E1L1 + H3N5F1E1L1 + H4N4F1E2 + H5N4E2 + H5N5F1E1 + H4N4F2L2 + H5N4F1L2 + H4N4F2E1L1 + H5N4F1E1L1 + H5N4F1E2 + H5N5E2 + H4N5F2L2 + H5N5F1E2 + H5N5F2L2)$                                                                                                                                                                                                                                                                                                                                                                                                                                                                                       |
| A3Fa                               |  | Relative abundance of species with 2 fucoses (i.e. at least one antennary fucose) within triantennary glycans     | $A3Fa = (H6N5F2E2L1) / (H6N5E1 + H6N5F1E1 + H6N5E1L1 + H6N5E2 + H6N5F1L2 + H6N5F1E1L1 + H6N5F1E2 + H6N5E1L2 + H6N5E2L1 + H6N5E3 + H6N5F1L3 + H6N5F1E1L2 + H6N5F1E2L1 + H6N5F1E3 + H6N5F2E2L1)$                                                                                                                                                                                                                                                                                                                                                                                                                                                                                                                                                                                                                                                                                                                                         |
| <b>Bisection (B)</b>               |                                                                                     |                                                                                                                   |                                                                                                                                                                                                                                                                                                                                                                                                                                                                                                                                                                                                                                                                                                                                                                                                                                                                                                                                        |

|        |                                                                                     |                                                                                                             |                                                                                                                                                                                                                                                                                                                                                                                                                                                                                                                                                                                                                                                                                                                                                                                                                                                                                                                                                                                            |
|--------|-------------------------------------------------------------------------------------|-------------------------------------------------------------------------------------------------------------|--------------------------------------------------------------------------------------------------------------------------------------------------------------------------------------------------------------------------------------------------------------------------------------------------------------------------------------------------------------------------------------------------------------------------------------------------------------------------------------------------------------------------------------------------------------------------------------------------------------------------------------------------------------------------------------------------------------------------------------------------------------------------------------------------------------------------------------------------------------------------------------------------------------------------------------------------------------------------------------------|
| CB     | 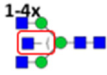   | Relative abundance of species with a bisecting GlcNAc within all complex glycans                            | $CB = (H3N5 + H3N5F1 + H4N5 + H4N5F1 + H5N5 + H5N5F1 + H4N5E1 + H4N5F1E1 + H5N5E1 + H3N5F1E1L1 + H5N5F1E1 + H5N5E2 + H4N5F2L2 + H5N5F1E2 + H5N5F2L2) / (H3N4 + H3N3E1 + H3N4F1 + H4N4 + H3N5 + H3N3F1E1 + H4N3E1 + H3N4F2 + H4N4F1 + H5N4 + H3N5F1 + H3N3F2L1 + H4N5 + H4N3F1L1 + H4N3F1E1 + H4N4L1 + H3N4F1E1 + H5N4F1 + H4N4E1 + H4N5F1 + H5N5 + H5N4L1 + H4N4F1E1 + H5N4E1 + H5N5F1 + H4N5E1 + H5N4F1L1 + H4N4E1L1 + H5N4F1E1 + H4N5F1E1 + H3N4F2L2 + H5N5E1 + H5N4E1L1 + H3N5F1E1L1 + H4N4F1E2 + H5N4E2 + H5N5F1E1 + H4N4F2L2 + H6N5E1 + H5N4F1L2 + H4N6F1E1 + H4N4F2E1L1 + H5N4F1E1L1 + H4N7E1 + H5N4F1E2 + H6N5F1E1 + H5N5E2 + H4N5F2L2 + H6N5E1L1 + H5N5F1E2 + H6N5E2 + H5N5F2L2 + H7N6E1 + H6N5F1L2 + H8N7 + H6N5F1E1L1 + H6N5F1E2 + H6N5E1L2 + H6N5E2L1 + H6N5E3 + H6N5F1L3 + H7N6E2 + H6N5F1E1L2 + H6N5F1E2L1 + H9N8 + H6N5F1E3 + H6N5F2E2L1 + H7N6E1L2 + H7N6E2L1 + H7N6E3 + H8N7E2 + H7N6F1E1L2 + H9N8E1 + H7N6E1L3 + H7N6E2L2 + H7N6E3L1 + H7N6F1E1L3 + H7N6F1E2L2 + H9N8E3)$ |
| A2B    |    | Relative abundance of species with a bisecting GlcNAc within diantennary glycans                            | $A2B = (H3N5 + H3N5F1 + H4N5 + H4N5F1 + H5N5 + H5N5F1 + H4N5E1 + H4N5F1E1 + H5N5E1 + H3N5F1E1L1 + H5N5F1E1 + H5N5E2 + H4N5F2L2 + H5N5F1E2 + H5N5F2L2) / (H3N4 + H3N4F1 + H4N4 + H3N5 + H3N4F2 + H4N4F1 + H5N4 + H3N5F1 + H4N5 + H4N4L1 + H3N4F1E1 + H5N4F1 + H4N4E1 + H4N5F1 + H5N5 + H5N4L1 + H4N4F1E1 + H5N4E1 + H5N5F1 + H4N5E1 + H5N4F1L1 + H4N4E1L1 + H5N4F1E1 + H4N5F1E1 + H3N4F2L2 + H5N5E1 + H5N4E1L1 + H3N5F1E1L1 + H4N4F1E2 + H5N4E2 + H5N5F1E1 + H4N4F2L2 + H5N4F1L2 + H4N4F2E1L1 + H5N4F1E1L1 + H5N4F1E2 + H5N5E2 + H4N5F2L2 + H5N5F1E2 + H5N5F2L2)$                                                                                                                                                                                                                                                                                                                                                                                                                           |
| A2FB   |    | Relative abundance of species with a bisecting GlcNAc within fucosylated diantennary glycans                | $A2FB = (H3N5F1 + H4N5F1 + H5N5F1 + H4N5F1E1 + H3N5F1E1L1 + H5N5F1E1 + H4N5F2L2 + H5N5F1E2 + H5N5F2L2) / (H3N4F1 + H3N4F2 + H4N4F1 + H3N5F1 + H3N4F1E1 + H5N4F1 + H4N5F1 + H4N4F1E1 + H5N5F1 + H5N4F1L1 + H5N4F1E1 + H4N5F1E1 + H3N4F2L2 + H5N5E1 + H4N5F1E1 + H5N4F1L2 + H4N4F2E1L1 + H5N4F1E1L1 + H5N4F1E2 + H4N5F2L2 + H5N5F1E2 + H5N5F2L2)$                                                                                                                                                                                                                                                                                                                                                                                                                                                                                                                                                                                                                                            |
| A2F0B  |    | Relative abundance of species with a bisecting GlcNAc within non-fucosylated diantennary glycans            | $A2F0B = (H3N5 + H4N5 + H5N5 + H4N5E1 + H5N5E1 + H5N5E2) / (H3N4 + H4N4 + H3N5 + H5N4 + H4N5 + H4N4L1 + H4N4E1 + H5N5 + H5N4L1 + H5N4E1 + H4N5E1 + H4N4E1L1 + H5N5E1 + H5N4E1L1 + H5N4E2 + H5N5E2)$                                                                                                                                                                                                                                                                                                                                                                                                                                                                                                                                                                                                                                                                                                                                                                                        |
| A2SB   |    | Relative abundance of species with a bisecting GlcNAc within sialylated diantennary glycans                 | $A2SB = (H4N5E1 + H4N5F1E1 + H5N5E1 + H3N5F1E1L1 + H5N5F1E1 + H5N5E2 + H4N5F2L2 + H5N5F1E2 + H5N5F2L2) / (H4N4L1 + H3N4F1E1 + H4N4E1 + H5N4L1 + H4N4F1E1 + H5N4E1 + H4N5E1 + H5N4F1L1 + H4N4E1L1 + H5N4F1E1 + H4N5F1E1 + H3N4F2L2 + H5N5E1 + H5N4E1L1 + H3N5F1E1L1 + H4N4F1E2 + H5N4E2 + H5N5F1E1 + H4N4F2L2 + H5N4F1L2 + H4N4F2E1L1 + H5N4F1E1L1 + H5N4F1E2 + H5N5E2 + H4N5F2L2 + H5N5F1E2 + H5N5F2L2)$                                                                                                                                                                                                                                                                                                                                                                                                                                                                                                                                                                                   |
| A2S0B  |  | Relative abundance of species with a bisecting GlcNAc within non-sialylated diantennary glycans             | $A2S0B = (H3N5 + H3N5F1 + H4N5 + H4N5F1 + H5N5 + H5N5F1) / (H3N4 + H3N4F1 + H4N4 + H3N5 + H3N4F2 + H4N4F1 + H5N4 + H3N5F1 + H4N5 + H5N4F1 + H4N5F1 + H5N5 + H5N5F1)$                                                                                                                                                                                                                                                                                                                                                                                                                                                                                                                                                                                                                                                                                                                                                                                                                       |
| A2FSB  |  | Relative abundance of species with a bisecting GlcNAc within fucosylated sialylated diantennary glycans     | $A2FSB = (H4N5F1E1 + H3N5F1E1L1 + H5N5F1E1 + H4N5F2L2 + H5N5F1E2 + H5N5F2L2) / (H3N4F1E1 + H4N4F1E1 + H5N4F1L1 + H5N4F1E1 + H4N5F1E1 + H3N4F2L2 + H3N5F1E1L1 + H4N4F1E2 + H5N5F1E1 + H4N4F2L2 + H5N4F1L2 + H4N4F2E1L1 + H5N4F1E1L1 + H5N4F1E2 + H4N5F2L2 + H5N5F1E2 + H5N5F2L2)$                                                                                                                                                                                                                                                                                                                                                                                                                                                                                                                                                                                                                                                                                                           |
| A2F0SB |  | Relative abundance of species with a bisecting GlcNAc within non-fucosylated sialylated diantennary glycans | $A2F0SB = (H4N5E1 + H5N5E1 + H5N5E2) / (H4N4L1 + H4N4E1 + H5N4L1 + H5N4E1 + H4N5E1 + H4N4E1L1 + H5N5E1 + H5N4E1L1 + H5N4E2 + H5N5E2)$                                                                                                                                                                                                                                                                                                                                                                                                                                                                                                                                                                                                                                                                                                                                                                                                                                                      |

|                            |  |                                                                                                                 |                                                                                                                                                                                                                                                                                                                                                                                                                                                                                                                                                                                                                                                                                                                                                                                                                                                                                                                                                                                                                                                                                                                                                                                                                                                                                                                                                                                                                                                                                                                                                                                                                                       |
|----------------------------|--|-----------------------------------------------------------------------------------------------------------------|---------------------------------------------------------------------------------------------------------------------------------------------------------------------------------------------------------------------------------------------------------------------------------------------------------------------------------------------------------------------------------------------------------------------------------------------------------------------------------------------------------------------------------------------------------------------------------------------------------------------------------------------------------------------------------------------------------------------------------------------------------------------------------------------------------------------------------------------------------------------------------------------------------------------------------------------------------------------------------------------------------------------------------------------------------------------------------------------------------------------------------------------------------------------------------------------------------------------------------------------------------------------------------------------------------------------------------------------------------------------------------------------------------------------------------------------------------------------------------------------------------------------------------------------------------------------------------------------------------------------------------------|
| A2FS0B                     |  | Relative abundance of species with a bisecting GlcNAc within fucosylated non-sialylated diantennary glycans     | $A2FS0B = (H3N5F1 + H4N5F1 + H5N5F1) / (H3N4F1 + H3N4F2 + H4N4F1 + H3N5F1 + H5N4F1 + H4N5F1 + H5N5F1)$                                                                                                                                                                                                                                                                                                                                                                                                                                                                                                                                                                                                                                                                                                                                                                                                                                                                                                                                                                                                                                                                                                                                                                                                                                                                                                                                                                                                                                                                                                                                |
| A2F0S0B                    |  | Relative abundance of species with a bisecting GlcNAc within non-fucosylated non-sialylated diantennary glycans | $A2F0S0B = (H3N5 + H4N5 + H5N5) / (H3N4 + H4N4 + H3N5 + H5N4 + H4N5 + H5N5)$                                                                                                                                                                                                                                                                                                                                                                                                                                                                                                                                                                                                                                                                                                                                                                                                                                                                                                                                                                                                                                                                                                                                                                                                                                                                                                                                                                                                                                                                                                                                                          |
| <b>Galactosylation (G)</b> |  |                                                                                                                 |                                                                                                                                                                                                                                                                                                                                                                                                                                                                                                                                                                                                                                                                                                                                                                                                                                                                                                                                                                                                                                                                                                                                                                                                                                                                                                                                                                                                                                                                                                                                                                                                                                       |
| CG                         |  | Galactosylation within all complex glycans                                                                      | $CG = (H3N3E1 + H4N4 + H3N3F1E1 + H4N3E1 + H4N4F1 + H5N4 + H3N3F2L1 + H4N5 + H4N3F1L1 + H4N3F1E1 + H4N4L1 + H3N4F1E1 + H5N4F1 + H4N4E1 + H4N5F1 + H5N5 + H5N4L1 + H4N4F1E1 + H5N4E1 + H5N5F1 + H4N5E1 + H5N4F1L1 + H4N4E1L1 + H5N4F1E1 + H4N5F1E1 + H3N4F2L2 + H5N5E1 + H5N4E1L1 + H3N5F1E1L1 + H4N4F1E2 + H5N4E2 + H5N5F1E1 + H4N4F2L2 + H6N5E1 + H5N4F1L2 + H4N6F1E1 + H4N4F2E1L1 + H5N4F1E1L1 + H4N7E1 + H5N4F1E2 + H6N5F1E1 + H5N5E2 + H4N5F2L2 + H6N5E1L1 + H5N5F1E2 + H6N5E2 + H5N5F2L2 + H7N6E1 + H6N5F1L2 + H8N7 + H6N5F1E1L1 + H6N5F1E2 + H6N5E1L2 + H6N5E2L1 + H6N5E3 + H6N5F1L3 + H7N6E2 + H6N5F1E1L2 + H6N5F1E2L1 + H9N8 + H6N5F1E3 + H6N5F2E2L1 + H7N6E1L2 + H7N6E2L1 + H7N6E3 + H8N7E2 + H7N6F1E1L2 + H9N8E1 + H7N6E1L3 + H7N6E2L2 + H7N6E3L1 + H7N6F1E1L3 + H7N6F1E2L2 + H9N8E3) / (H3N4 + H3N3E1 + H3N4F1 + H4N4 + H3N5 + H3N3F1E1 + H4N3E1 + H3N4F2 + H4N4F1 + H5N4 + H3N5F1 + H3N3F2L1 + H4N5 + H4N3F1L1 + H4N3F1E1 + H4N4L1 + H3N4F1E1 + H5N4F1 + H4N4E1 + H4N5F1 + H5N5 + H5N4L1 + H4N4F1E1 + H5N4E1 + H5N5F1 + H4N5E1 + H5N4F1L1 + H4N4E1L1 + H5N4F1E1 + H4N5F1E1 + H3N4F2L2 + H5N5E1 + H5N4E1L1 + H3N5F1E1L1 + H4N4F1E2 + H5N4E2 + H5N5F1E1 + H4N4F2L2 + H6N5E1 + H5N4F1L2 + H4N6F1E1 + H4N4F2E1L1 + H5N4F1E1L1 + H4N7E1 + H5N4F1E2 + H6N5F1E1 + H5N5E2 + H4N5F2L2 + H6N5E1L1 + H5N5F1E2 + H6N5E2 + H5N5F2L2 + H7N6E1 + H6N5F1L2 + H8N7 + H6N5F1E1L1 + H6N5F1E2 + H6N5E1L2 + H6N5E2L1 + H6N5E3 + H6N5F1L3 + H7N6E2 + H6N5F1E1L2 + H6N5F1E2L1 + H9N8 + H6N5F1E3 + H6N5F2E2L1 + H7N6E1L2 + H7N6E2L1 + H7N6E3 + H8N7E2 + H7N6F1E1L2 + H9N8E1 + H7N6E1L3 + H7N6E2L2 + H7N6E3L1 + H7N6F1E1L3 + H7N6F1E2L2 + H9N8E3)$ |
| A2G                        |  | Galactosylation per antenna within diantennary glycans                                                          | $A2G = (0/2 * (H3N4 + H3N4F1 + H3N5 + H3N4F2 + H3N5F1) + 1/2 * (H4N4 + H4N4F1 + H4N5 + H4N4L1 + H4N4E1 + H4N5F1 + H4N4F1E1 + H4N5E1 + H4N4E1L1 + H4N5F1E1 + H4N4F1E2 + H4N4F2L2 + H4N4F2E1L1 + H4N5F2L2) + 2/2 * (H5N4 + H5N4F1 + H5N5 + H5N4L1 + H5N4E1 + H5N5F1 + H5N4F1L1 + H4N4E1L1 + H5N4F1E1 + H3N4F2L2 + H5N5E1 + H5N4E1L1 + H4N4F1E2 + H5N4E2 + H5N5F1E1 + H4N4F2L2 + H5N4F1L2 + H4N4F2E1L1 + H5N4F1E1L1 + H5N4F1E2 + H5N5E2 + H5N5F1E2 + H5N5F2L2)) / (H3N4 + H3N4F1 + H4N4 + H3N5 + H3N4F2 + H4N4F1 + H5N4 + H3N5F1 + H4N5 + H4N4L1 + H3N4F1E1 + H5N4F1 + H4N4E1 + H4N5F1 + H5N5 + H5N4L1 + H4N4F1E1 + H5N4E1 + H5N5F1 + H4N5E1 + H5N4F1L1 + H4N4E1L1 + H5N4F1E1 + H4N5F1E1 + H3N4F2L2 + H5N5E1 + H5N4E1L1 + H3N5F1E1L1 + H4N4F1E2 + H5N4E2 + H5N5F1E1 + H4N4F2L2 + H5N4F1L2 + H4N4F2E1L1 + H5N4F1E1L1 + H5N4F1E2 + H5N5E2 + H4N5F2L2)$                                                                                                                                                                                                                                                                                                                                                                                                                                                                                                                                                                                                                                                                                                                                                                                     |
| A4G                        |  | Galactosylation per antenna within tetra-antennary glycans                                                      | $A4G = (0/4 * (0) + 1/4 * (H4N6F1E1) + 2/4 * (0) + 3/4 * (0) + 4/4 * (H7N6E1 + H7N6E2 + H7N6E1L2 + H7N6E2L1 + H7N6E3 + H7N6F1E1L2 + H7N6E1L3 + H7N6E2L2 + H7N6E3L1 + H7N6F1E1L3 + H7N6F1E2L2)) / (H4N6F1E1 + H7N6E1 + H7N6E2 + H7N6E1L2 + H7N6E2L1 + H7N6E3 + H7N6F1E1L2 + H7N6E1L3 + H7N6E2L2 + H7N6E3L1 + H7N6F1E1L3 + H7N6F1E2L2)$                                                                                                                                                                                                                                                                                                                                                                                                                                                                                                                                                                                                                                                                                                                                                                                                                                                                                                                                                                                                                                                                                                                                                                                                                                                                                                 |
| A2FG                       |  | Galactosylation per antenna within fucosylated diantennary glycans                                              | $A2FG = (0/2 * (H3N4F1 + H3N4F2 + H3N5F1) + 1/2 * (H4N4F1 + H4N5F1 + H4N4F1E1 + H4N5F1E1 + H4N4F1E2 + H4N4F2L2 + H4N4F2E1L1 + H4N5F2L2) + 2/2 * (H5N4F1 + H5N5F1 + H5N4F1L1 + H5N4F1E1 + H3N4F2L2 + H4N4F1E2 + H5N5F1E1 + H4N4F2L2 + H5N4F1L2 + H4N4F2E1L1 + H5N4F1E1L1 + H5N4F1E2 + H5N5F1E2 + H5N5F2L2)) / (H3N4F1 + H3N4F2 + H4N4F1 + H3N5F1 + H3N4F1E1 + H5N4F1 + H4N5F1 + H4N4F1E1 + H5N5F1 + H5N4F1L1 + H5N4F1E1 + H4N5F1E1 + H3N4F2L2 + H3N5F1E1L1 + H4N4F1E2 + H5N5F1E1 + H4N4F2L2 + H5N4F1L2 + H4N4F2E1L1 + H5N4F1E1L1 + H5N4F1E2 + H4N5F2L2)$                                                                                                                                                                                                                                                                                                                                                                                                                                                                                                                                                                                                                                                                                                                                                                                                                                                                                                                                                                                                                                                                               |

|                 |                                                                                     |                                                                                        |                                                                                                                                                                                                                                                                                                                                                                                                                                                                                                                                                                                                                                                                                                                                                                                                                                                 |
|-----------------|-------------------------------------------------------------------------------------|----------------------------------------------------------------------------------------|-------------------------------------------------------------------------------------------------------------------------------------------------------------------------------------------------------------------------------------------------------------------------------------------------------------------------------------------------------------------------------------------------------------------------------------------------------------------------------------------------------------------------------------------------------------------------------------------------------------------------------------------------------------------------------------------------------------------------------------------------------------------------------------------------------------------------------------------------|
| A2F0G           |    | Galactosylation per antenna within non-fucosylated diantennary glycans                 | $A2F0G = (0/2 * (H3N4 + H3N5)) + 1/2 * (H4N4 + H4N5 + H4N4L1 + H4N4E1 + H4N5E1 + H4N4E1L1) + 2/2 * (H5N4 + H5N5 + H5N4L1 + H5N4E1 + H4N4E1L1 + H5N5E1 + H5N4E1L1 + H5N4E2 + H5N5E2)) / (H3N4 + H4N4 + H3N5 + H5N4 + H4N5 + H4N4L1 + H4N4E1 + H5N5 + H5N4L1 + H5N4E1 + H4N5E1 + H4N4E1L1 + H5N5E1 + H5N4E1L1 + H5N4E2 + H5N5E2)$                                                                                                                                                                                                                                                                                                                                                                                                                                                                                                                 |
| A2SG            |    | Galactosylation per antenna within sialylated diantennary glycans                      | $A2SG = (0/2 * (0)) + 1/2 * (H4N4L1 + H4N4E1 + H4N4F1E1 + H4N5E1 + H4N4E1L1 + H4N5F1E1 + H4N4F1E2 + H4N4F2L2 + H4N4F2E1L1 + H4N5F2L2) + 2/2 * (H5N4L1 + H5N4E1 + H5N4F1L1 + H4N4E1L1 + H5N4F1E1 + H3N4F2L2 + H5N5E1 + H5N4E1L1 + H4N4F1E2 + H5N4E2 + H5N5F1E1 + H4N4F2L2 + H5N4F1L2 + H4N4F2E1L1 + H5N4F1E1L1 + H5N4F1E2 + H5N5E2 + H5N5F1E2 + H5N5F2L2)) / (H4N4L1 + H3N4F1E1 + H4N4E1 + H5N4L1 + H4N4F1E1 + H5N4E1 + H4N5E1 + H5N4F1L1 + H4N4E1L1 + H5N4F1E1 + H4N5F1E1 + H3N4F2L2 + H5N5E1 + H5N4E1L1 + H3N5F1E1L1 + H4N4F1E2 + H5N4E2 + H5N5F1E1 + H4N4F2L2 + H5N4F1L2 + H4N4F2E1L1 + H5N4F1E1L1 + H5N4F1E2 + H5N5E2 + H4N5F2L2 + H5N5F1E2 + H5N5F2L2)$                                                                                                                                                                                     |
| A2S0G           |    | Galactosylation per antenna within non-sialylated diantennary glycans                  | $A2S0G = (0/2 * (H3N4 + H3N4F1 + H3N5 + H3N4F2 + H3N5F1)) + 1/2 * (H4N4 + H4N4F1 + H4N5 + H4N5F1) + 2/2 * (H5N4 + H5N4F1 + H5N5 + H5N5F1)) / (H3N4 + H3N4F1 + H4N4 + H3N5 + H3N4F2 + H4N4F1 + H5N4 + H3N5F1 + H4N5 + H5N4F1 + H4N5F1 + H5N5 + H5N5F1)$                                                                                                                                                                                                                                                                                                                                                                                                                                                                                                                                                                                          |
| A2FSG           |    | Galactosylation per antenna within fucosylated sialylated diantennary glycans          | $A2FSG = (0/2 * (0)) + 1/2 * (H4N4F1E1 + H4N5F1E1 + H4N4F1E2 + H4N4F2L2 + H4N4F2E1L1 + H4N5F2L2) + 2/2 * (H5N4F1L1 + H5N4F1E1 + H3N4F2L2 + H4N4F1E2 + H5N5F1E1 + H4N4F2L2 + H5N4F1L2 + H4N4F2E1L1 + H5N4F1E1L1 + H5N4F1E2 + H5N5F1E2 + H5N5F2L2)) / (H3N4F1E1 + H4N4F1E1 + H5N4F1L1 + H5N4F1E1 + H4N5F1E1 + H3N4F2L2 + H3N5F1E1L1 + H4N4F1E2 + H5N5F1E1 + H4N4F2L2 + H5N4F1L2 + H4N4F2E1L1 + H5N4F1E1L1 + H5N4F1E2 + H4N5F2L2 + H5N5F1E2 + H5N5F2L2)$                                                                                                                                                                                                                                                                                                                                                                                           |
| A2F0SG          |    | Galactosylation per antenna within non-fucosylated sialylated diantennary glycans      | $A2F0SG = (0/2 * (0)) + 1/2 * (H4N4L1 + H4N4E1 + H4N5E1 + H4N4E1L1) + 2/2 * (H5N4L1 + H5N4E1 + H4N4E1L1 + H5N5E1 + H5N4E1L1 + H5N4E2 + H5N5E2)) / (H4N4L1 + H4N4E1 + H5N4L1 + H5N4E1 + H4N5E1 + H4N4E1L1 + H5N5E1 + H5N4E1L1 + H5N4E2 + H5N5E2)$                                                                                                                                                                                                                                                                                                                                                                                                                                                                                                                                                                                                |
| A2FS0G          |    | Galactosylation per antenna within fucosylated non-sialylated diantennary glycans      | $A2FS0G = (0/2 * (H3N4F1 + H3N4F2 + H3N5F1)) + 1/2 * (H4N4F1 + H4N5F1) + 2/2 * (H5N4F1 + H5N5F1)) / (H3N4F1 + H3N4F2 + H4N4F1 + H3N5F1 + H5N4F1 + H4N5F1 + H5N5F1)$                                                                                                                                                                                                                                                                                                                                                                                                                                                                                                                                                                                                                                                                             |
| A2F0S0G         |  | Galactosylation per antenna within non-fucosylated, non-sialylated diantennary glycans | $A2F0S0G = (0/2 * (H3N4 + H3N5)) + 1/2 * (H4N4 + H4N5) + 2/2 * (H5N4 + H5N5)) / (H3N4 + H4N4 + H3N5 + H5N4 + H4N5 + H5N5)$                                                                                                                                                                                                                                                                                                                                                                                                                                                                                                                                                                                                                                                                                                                      |
| A4F0G           |  | Galactosylation per antenna within non-fucosylated tetra-antennary glycans             | $A4F0G = (0/4 * (0)) + 1/4 * (0) + 2/4 * (0) + 3/4 * (0) + 4/4 * (H7N6E1 + H7N6E2 + H7N6E1L2 + H7N6E2L1 + H7N6E3 + H7N6E1L3 + H7N6E2L2 + H7N6E3L1) / (H4N6F1E1 + H7N6E1 + H7N6E2 + H7N6E1L2 + H7N6E2L1 + H7N6E3 + H7N6F1E1L2 + H7N6E1L3 + H7N6E2L2 + H7N6E3L1 + H7N6F1E1L3 + H7N6F1E2L2)$                                                                                                                                                                                                                                                                                                                                                                                                                                                                                                                                                       |
| Sialylation (S) |                                                                                     |                                                                                        |                                                                                                                                                                                                                                                                                                                                                                                                                                                                                                                                                                                                                                                                                                                                                                                                                                                 |
| CS              |  | Sialylation per antenna within all complex glycans                                     | $CS = (H3N3E1 + H3N3F1E1 + H4N3E1 + H3N3F2L1 + H4N3F1L1 + H4N3F1E1 + H4N4L1 + H3N4F1E1 + H4N4E1 + H5N4L1 + H4N4F1E1 + H5N4E1 + H4N5E1 + H5N4F1L1 + H4N4E1L1 + H5N4F1E1 + H4N5F1E1 + H3N4F2L2 + H5N5E1 + H5N4E1L1 + H3N5F1E1L1 + H4N4F1E2 + H5N4E2 + H5N5F1E1 + H4N4F2L2 + H6N5E1 + H5N4F1L2 + H4N6F1E1 + H4N4F2E1L1 + H5N4F1E1L1 + H4N7E1 + H5N4F1E2 + H6N5F1E1 + H5N5E2 + H4N5F2L2 + H6N5E1L1 + H5N5F1E2 + H6N5E2 + H5N5F2L2 + H7N6E1 + H6N5F1L2 + H6N5F1E1L1 + H6N5F1E2 + H6N5E1L2 + H6N5E2L1 + H6N5E3 + H6N5F1L3 + H7N6E2 + H6N5F1E1L2 + H6N5F1E2L1 + H6N5F1E3 + H6N5F2E2L1 + H7N6E1L2 + H7N6E2L1 + H7N6E3 + H8N7E2 + H7N6F1E1L2 + H9N8E1 + H7N6E1L3 + H7N6E2L2 + H7N6E3L1 + H7N6F1E1L3 + H7N6F1E2L2 + H9N8E3) / (H3N4 + H3N3E1 + H3N4F1 + H4N4 + H3N5 + H3N3F1E1 + H4N3E1 + H3N4F2 + H4N4F1 + H5N4 + H3N5F1 + H3N3F2L1 + H4N5 + H4N3F1L1 +$ |

|       |                                                                                     |                                                                     |                                                                                                                                                                                                                                                                                                                                                                                                                                                                                                                                                                                                                                                                                                                                                                                                                                                                                                                                |
|-------|-------------------------------------------------------------------------------------|---------------------------------------------------------------------|--------------------------------------------------------------------------------------------------------------------------------------------------------------------------------------------------------------------------------------------------------------------------------------------------------------------------------------------------------------------------------------------------------------------------------------------------------------------------------------------------------------------------------------------------------------------------------------------------------------------------------------------------------------------------------------------------------------------------------------------------------------------------------------------------------------------------------------------------------------------------------------------------------------------------------|
|       |                                                                                     |                                                                     | $\begin{aligned} &H4N3F1E1 + H4N4L1 + H3N4F1E1 + H5N4F1 + H4N4E1 + H4N5F1 + H5N5 + H5N4L1 + H4N4F1E1 + H5N4E1 + H5N5F1 + \\ &H4N5E1 + H5N4F1L1 + H4N4E1L1 + H5N4F1E1 + H4N5F1E1 + H3N4F2L2 + H5N5E1 + H5N4E1L1 + H3N5F1E1L1 + \\ &H4N4F1E2 + H5N4E2 + H5N5F1E1 + H4N4F2L2 + H6N5E1 + H5N4F1L2 + H4N6F1E1 + H4N4F2E1L1 + H5N4F1E1L1 + \\ &H4N7E1 + H5N4F1E2 + H6N5F1E1 + H5N5E2 + H4N5F2L2 + H6N5E1L1 + H5N5F1E2 + H6N5E2 + H5N5F2L2 + H7N6E1 + \\ &H6N5F1L2 + H8N7 + H6N5F1E1L1 + H6N5F1E2 + H6N5E1L2 + H6N5E2L1 + H6N5E3 + H6N5F1L3 + H7N6E2 + H6N5F1E1L2 \\ &+ H6N5F1E2L1 + H9N8 + H6N5F1E3 + H6N5F2E2L1 + H7N6E1L2 + H7N6E2L1 + H7N6E3 + H8N7E2 + H7N6F1E1L2 + \\ &H9N8E1 + H7N6E1L3 + H7N6E2L2 + H7N6E3L1 + H7N6F1E1L3 + H7N6F1E2L2 + H9N8E3 \end{aligned}$                                                                                                                                                                |
| A2S   |    | Sialylation per antenna within diantennary glycans                  | $\begin{aligned} A2S = & ( 0/2 * ( H3N4 + H3N4F1 + H4N4 + H3N5 + H3N4F2 + H4N4F1 + H5N4 + H3N5F1 + H4N5 + H5N4F1 + H4N5F1 + \\ & H5N5 + H5N5F1 ) + 1/2 * ( H4N4L1 + H3N4F1E1 + H4N4E1 + H5N4L1 + H4N4F1E1 + H5N4E1 + H4N5E1 + H5N4F1L1 + \\ & H5N4F1E1 + H4N5F1E1 + H5N5E1 + H5N5F1E1 ) + 2/2 * ( H4N4E1L1 + H3N4F2L2 + H5N4E1L1 + H3N5F1E1L1 + H4N4F1E2 \\ & + H5N4E2 + H4N4F2L2 + H5N4F1L2 + H4N4F2E1L1 + H5N4F1E1L1 + H5N4F1E2 + H5N5E2 + H4N5F2L2 + H5N5F1E2 + \\ & H5N5F2L2 ) ) / ( H3N4 + H3N4F1 + H4N4 + H3N5 + H3N4F2 + H4N4F1 + H5N4 + H3N5F1 + H4N5 + H4N4L1 + H3N4F1E1 + \\ & H5N4F1 + H4N4E1 + H4N5F1 + H5N5 + H5N4L1 + H4N4F1E1 + H5N4E1 + H5N5F1 + H4N5E1 + H5N4F1L1 + H4N4E1L1 + \\ & H5N4F1E1 + H4N5F1E1 + H3N4F2L2 + H5N5E1 + H5N4E1L1 + H3N5F1E1L1 + H4N4F1E2 + H5N4E2 + H5N5F1E1 + \\ & H4N4F2L2 + H5N4F1L2 + H4N4F2E1L1 + H5N4F1E1L1 + H5N4F1E2 + H5N5E2 + H4N5F2L2 + H5N5F1E2 + H5N5F2L2 ) \end{aligned}$ |
| A3S   |    | Sialylation per antenna within triantennary glycans                 | $\begin{aligned} A3S = & ( 0/3 * ( 0 ) + 1/3 * ( H6N5E1 + H6N5F1E1 ) + 2/3 * ( H6N5E1L1 + H6N5E2 + H6N5F1L2 + H6N5F1E1L1 + H6N5F1E2 ) \\ & + 3/3 * ( H6N5E1L2 + H6N5E2L1 + H6N5E3 + H6N5F1L3 + H6N5F1E1L2 + H6N5F1E2L1 + H6N5F1E3 + H6N5F2E2L1 ) ) / \\ & ( H6N5E1 + H6N5F1E1 + H6N5E1L1 + H6N5E2 + H6N5F1L2 + H6N5F1E1L1 + H6N5F1E2 + H6N5E1L2 + H6N5E2L1 + \\ & H6N5E3 + H6N5F1L3 + H6N5F1E1L2 + H6N5F1E2L1 + H6N5F1E3 + H6N5F2E2L1 ) \end{aligned}$                                                                                                                                                                                                                                                                                                                                                                                                                                                                         |
| A4S   |    | Sialylation per antenna within tetra-antennary glycans              | $\begin{aligned} A4S = & ( 0/4 * ( 0 ) + 1/4 * ( H4N6F1E1 + H7N6E1 ) + 2/4 * ( H7N6E2 ) + 3/4 * ( H7N6E1L2 + H7N6E2L1 + H7N6E3 + \\ & H7N6F1E1L2 ) + 4/4 * ( H7N6E1L3 + H7N6E2L2 + H7N6E3L1 + H7N6F1E1L3 + H7N6F1E2L2 ) ) / ( H4N6F1E1 + H7N6E1 + \\ & H7N6E2 + H7N6E1L2 + H7N6E2L1 + H7N6E3 + H7N6F1E1L2 + H7N6E1L3 + H7N6E2L2 + H7N6E3L1 + H7N6F1E1L3 + \\ & H7N6F1E2L2 ) \end{aligned}$                                                                                                                                                                                                                                                                                                                                                                                                                                                                                                                                     |
| A2FS  |    | Sialylation per antenna within fucosylated diantennary glycans      | $\begin{aligned} A2FS = & ( 0/2 * ( H3N4F1 + H3N4F2 + H4N4F1 + H3N5F1 + H5N4F1 + H4N5F1 + H5N5F1 ) + 1/2 * ( H3N4F1E1 + H4N4F1E1 \\ & + H5N4F1L1 + H5N4F1E1 + H4N5F1E1 + H5N5F1E1 ) + 2/2 * ( H3N4F2L2 + H3N5F1E1L1 + H4N4F1E2 + H4N4F2L2 + \\ & H5N4F1L2 + H4N4F2E1L1 + H5N4F1E1L1 + H5N4F1E2 + H4N5F2L2 + H5N5F1E2 + H5N5F2L2 ) ) / ( H3N4F1 + H3N4F2 + \\ & H4N4F1 + H3N5F1 + H3N4F1E1 + H5N4F1 + H4N5F1 + H4N4F1E1 + H5N5F1 + H5N4F1L1 + H5N4F1E1 + H4N5F1E1 + \\ & H3N4F2L2 + H3N5F1E1L1 + H4N4F1E2 + H5N5F1E1 + H4N4F2L2 + H5N4F1L2 + H4N4F2E1L1 + H5N4F1E1L1 + H5N4F1E2 \\ & + H4N5F2L2 + H5N5F1E2 + H5N5F2L2 ) \end{aligned}$                                                                                                                                                                                                                                                                                          |
| A2F0S |  | Sialylation per antenna within non-fucosylated diantennary glycans  | $\begin{aligned} A2F0S = & ( 0/2 * ( H3N4 + H4N4 + H3N5 + H5N4 + H4N5 + H5N5 ) + 1/2 * ( H4N4L1 + H4N4E1 + H5N4L1 + H5N4E1 + H4N5E1 \\ & + H5N5E1 ) + 2/2 * ( H4N4E1L1 + H5N4E1L1 + H5N4E2 + H5N5E2 ) ) / ( H3N4 + H4N4 + H3N5 + H5N4 + H4N5 + H4N4L1 + \\ & H4N4E1 + H5N5 + H5N4L1 + H5N4E1 + H4N5E1 + H4N4E1L1 + H5N5E1 + H5N4E1L1 + H5N4E2 + H5N5E2 ) \end{aligned}$                                                                                                                                                                                                                                                                                                                                                                                                                                                                                                                                                        |
| A3FS  |  | Sialylation per antenna within fucosylated triantennary glycans     | $\begin{aligned} A3FS = & ( 0/3 * ( 0 ) + 1/3 * ( H6N5F1E1 ) + 2/3 * ( H6N5F1L2 + H6N5F1E1L1 + H6N5F1E2 ) + 3/3 * ( H6N5F1L3 + H6N5F1E1L2 \\ & + H6N5F1E2L1 + H6N5F1E3 + H6N5F2E2L1 ) ) / ( H6N5F1E1 + H6N5F1L2 + H6N5F1E1L1 + H6N5F1E2 + H6N5F1L3 + \\ & H6N5F1E1L2 + H6N5F1E2L1 + H6N5F1E3 + H6N5F2E2L1 ) \end{aligned}$                                                                                                                                                                                                                                                                                                                                                                                                                                                                                                                                                                                                     |
| A3F0S |  | Sialylation per antenna within non-fucosylated triantennary glycans | $\begin{aligned} A3F0S = & ( 0/3 * ( 0 ) + 1/3 * ( H6N5E1 ) + 2/3 * ( H6N5E1L1 + H6N5E2 ) + 3/3 * ( H6N5E1L2 + H6N5E2L1 + H6N5E3 ) ) / \\ & ( H6N5E1 + H6N5E1L1 + H6N5E2 + H6N5E1L2 + H6N5E2L1 + H6N5E3 ) \end{aligned}$                                                                                                                                                                                                                                                                                                                                                                                                                                                                                                                                                                                                                                                                                                       |
| A4FS  |  | Sialylation per antenna within fucosylated tetra-antennary glycans  | $\begin{aligned} A4FS = & ( 0/4 * ( 0 ) + 1/4 * ( H4N6F1E1 ) + 2/4 * ( 0 ) + 3/4 * ( H7N6F1E1L2 ) + 4/4 * ( H7N6F1E1L3 + H7N6F1E2L2 ) ) / \\ & ( H4N6F1E1 + H7N6E1 + H7N6E2 + H7N6E1L2 + H7N6E2L1 + H7N6E3 + H7N6F1E1L2 + H7N6E1L3 + H7N6E2L2 + \\ & H7N6E3L1 + H7N6F1E1L3 + H7N6F1E2L2 ) \end{aligned}$                                                                                                                                                                                                                                                                                                                                                                                                                                                                                                                                                                                                                       |

|        |                                                                                     |                                                                        |                                                                                                                                                                                                                                                                                                                                                                                                                                                                                                                                                                                                                                                                                                                                                                                                                                                                                                                                                                                                                                                                                                                                                                                                                                                                                                                                                                                                                                                                                                                                                                                                                                                                                                           |
|--------|-------------------------------------------------------------------------------------|------------------------------------------------------------------------|-----------------------------------------------------------------------------------------------------------------------------------------------------------------------------------------------------------------------------------------------------------------------------------------------------------------------------------------------------------------------------------------------------------------------------------------------------------------------------------------------------------------------------------------------------------------------------------------------------------------------------------------------------------------------------------------------------------------------------------------------------------------------------------------------------------------------------------------------------------------------------------------------------------------------------------------------------------------------------------------------------------------------------------------------------------------------------------------------------------------------------------------------------------------------------------------------------------------------------------------------------------------------------------------------------------------------------------------------------------------------------------------------------------------------------------------------------------------------------------------------------------------------------------------------------------------------------------------------------------------------------------------------------------------------------------------------------------|
| A4F0S  |    | Sialylation per antenna within non-fucosylated tetra-antennary glycans | $A4F0S = ( (0/4 * (0) + 1/4 * (H7N6E1) + 2/4 * (H7N6E1L2 + H7N6E2L1 + H7N6E3) + 4/4 * (H7N6E1L3 + H7N6E2L2 + H7N6E3L1) ) ) / ( (H4N6F1E1 + H7N6E1 + H7N6E2 + H7N6E1L2 + H7N6E2L1 + H7N6E3 + H7N6F1E1L2 + H7N6E1L3 + H7N6E2L2 + H7N6E3L1 + H7N6F1E1L3 + H7N6F1E2L2) )$                                                                                                                                                                                                                                                                                                                                                                                                                                                                                                                                                                                                                                                                                                                                                                                                                                                                                                                                                                                                                                                                                                                                                                                                                                                                                                                                                                                                                                     |
| A2GS   |    | Sialylation per galactose within diantennary glycans                   | $A2GS = ( (0/2 * (H3N4 + H3N4F1 + H4N4 + H3N5 + H3N4F2 + H4N4F1 + H5N4 + H3N5F1 + H4N5 + H5N4F1 + H4N5F1 + H5N5 + H5N5F1) + 1/2 * (H4N4L1 + H3N4F1E1 + H4N4E1 + H5N4L1 + H4N4F1E1 + H5N4E1 + H4N5E1 + H5N4F1L1 + H5N4F1E1 + H4N5F1E1 + H5N5E1 + H5N5F1E1) + 2/2 * (H4N4E1L1 + H3N4F2L2 + H5N4E1L1 + H3N5F1E1L1 + H4N4F1E2 + H5N4E2 + H4N4F2L2 + H5N4F1L2 + H4N4F2E1L1 + H5N4F1E1L1 + H5N4F1E2 + H4N5E2 + H4N5F2L2 + H5N5F2L2) ) ) / ( (H3N4 + H3N4F1 + H4N4 + H3N5 + H3N4F2 + H4N4F1 + H5N4 + H3N5F1 + H4N5 + H4N4L1 + H3N4F1E1 + H5N4F1 + H4N4E1 + H4N5F1 + H5N5 + H5N4L1 + H4N4F1E1 + H5N4E1 + H5N5F1 + H4N5E1 + H5N4F1L1 + H4N4E1L1 + H5N4F1E1 + H4N5F1E1 + H3N4F2L2 + H5N4E2 + H5N5F1E1 + H3N4F2L2 + H5N5E1 + H5N4E1L1 + H3N5F1E1L1 + H4N4F1E2 + H5N4F2L2 + H5N4F1L2 + H4N4F2E1L1 + H5N4F1E1L1 + H5N4F1E2 + H4N5E2 + H4N5F2L2 + H5N5F2L2) ) ) / ( (H3N4 + H3N4F1 + H3N5 + H3N4F2 + H3N5F1) + 1/2 * (H4N4 + H4N4F1 + H4N5 + H4N4L1 + H4N4F1 + H4N5F1 + H4N4F1E1 + H4N5E1 + H4N4E1L1 + H4N5F1E1 + H4N4F1E2 + H4N4F2L2 + H4N4F2E1L1 + H4N5F2L2) + 2/2 * (H5N4 + H5N4F1 + H5N5 + H5N4L1 + H5N4E1 + H5N5F1 + H5N4F1L1 + H4N4E1L1 + H5N4F1E1 + H3N4F2L2 + H5N5E1 + H5N4E1L1 + H4N4F1E2 + H5N4E2 + H5N5F1E1 + H4N4F2L2 + H5N5E1 + H5N4E1L1 + H3N5F1E1L1 + H4N4F1E2 + H5N5E2 + H5N5F1E2 + H5N5F2L2) ) ) / ( (H3N4 + H3N4F1 + H4N4 + H3N5 + H3N4F2 + H4N4F1 + H5N4 + H3N5F1 + H4N5 + H4N4L1 + H3N4F1E1 + H5N4F1 + H4N4E1 + H4N5F1 + H5N5 + H5N4L1 + H4N4F1E1 + H5N4E1 + H5N5F1 + H4N5E1 + H5N4F1L1 + H4N4E1L1 + H5N4F1E1 + H4N5F1E1 + H3N4F2L2 + H5N5E1 + H5N4E1L1 + H3N5F1E1L1 + H4N4F1E2 + H5N4E2 + H5N5F1E1 + H4N4F2L2 + H5N4F1L2 + H4N4F2E1L1 + H5N4F1E1L1 + H5N4F1E2 + H4N5E2 + H4N5F2L2 + H5N5F2L2) ) )$ |
| A2FGS  |    | Sialylation per galactose within fucosylated diantennary glycans       | $A2FGS = ( (0/2 * (H3N4F1 + H3N4F2 + H4N4F1 + H3N5F1 + H5N4F1 + H4N5F1 + H5N5F1) + 1/2 * (H3N4F1E1 + H4N4F1E1 + H5N4F1L1 + H5N4F1E1 + H4N5F1E1 + H5N5F1E1) + 2/2 * (H3N4F2L2 + H3N5F1E1L1 + H4N4F1E2 + H4N4F2L2 + H5N4F1L2 + H4N4F2E1L1 + H5N4F1E1L1 + H5N4F1E2 + H4N5F2L2 + H5N5F2L2) ) ) / ( (H3N4F1 + H3N4F2 + H4N4F1 + H3N5F1 + H3N4F1E1 + H5N4F1 + H4N5F1 + H5N5F1 + H5N4F1L1 + H5N4F1E1 + H5N4F1L2 + H4N4F2E1L1 + H5N4F1E1L1 + H5N4F1E2 + H4N5F2L2 + H5N5F2L2) ) ) / ( (0/2 * (H3N4F1 + H3N4F2 + H3N5F1) + 1/2 * (H4N4F1 + H4N5F1 + H4N4F1E1 + H4N5F1E1 + H4N4F1E2 + H4N4F2L2 + H4N4F2E1L1 + H4N5F2L2) + 2/2 * (H5N4F1 + H5N5F1 + H5N4F1L1 + H5N4F1E1 + H3N4F2L2 + H4N4F1E2 + H5N5F1E1L1 + H5N4F1E1L1 + H5N4F1E2 + H4N5F2L2 + H5N5F2L2) ) ) / ( (H3N4F1 + H3N4F2 + H4N4F1 + H3N5F1 + H3N4F1E1 + H5N4F1 + H4N5F1 + H4N4F1E1 + H5N5F1 + H5N4F1L1 + H5N4F1E1 + H4N5F1E1 + H3N4F2L2 + H3N5F1E1L1 + H4N4F1E2 + H5N5F1E1 + H4N4F2L2 + H5N4F1L2 + H4N4F2E1L1 + H5N4F1E1L1 + H5N4F1E2 + H4N5F2L2 + H5N5F2L2) ) )$                                                                                                                                                                                                                                                                                                                                                                                                                                                                                                                                                                                                                                                                                           |
| A2F0GS |  | Sialylation per galactose within non-fucosylated diantennary glycans   | $A2F0GS = ( (0/2 * (H3N4 + H4N4 + H3N5 + H5N4 + H4N5 + H5N5) + 1/2 * (H4N4L1 + H4N4E1 + H5N4L1 + H5N4E1 + H4N5E1 + H5N5E1) + 2/2 * (H4N4E1L1 + H5N4E1L1 + H5N4E2 + H5N5E2) ) ) / ( (H3N4 + H4N4 + H3N5 + H5N4 + H4N5 + H4N4L1 + H4N4E1 + H5N5 + H5N4L1 + H5N4E1 + H4N5E1 + H4N4E1L1 + H5N5E1 + H5N4E1L1 + H5N4E2 + H5N5E2) ) ) / ( (0/2 * (H3N4 + H3N5) + 1/2 * (H4N4 + H4N5 + H4N4L1 + H4N4E1 + H4N5E1 + H4N4E1L1) + 2/2 * (H5N4 + H5N5 + H5N4L1 + H5N4E1 + H4N4E1L1 + H5N5E1 + H5N4E1L1 + H5N4E2 + H5N5E2) ) ) / ( (H3N4 + H4N4 + H3N5 + H5N4 + H4N5 + H4N4L1 + H4N4E1 + H5N5 + H5N4L1 + H5N4E1 + H4N5E1 + H4N4E1L1 + H5N5E1 + H5N4E1L1 + H5N4E2 + H5N5E2) ) )$                                                                                                                                                                                                                                                                                                                                                                                                                                                                                                                                                                                                                                                                                                                                                                                                                                                                                                                                                                                                                                         |
| A4FGS  |  | Sialylation per galactose within fucosylated tetra-antennary glycans   | $A4FGS = ( (0/4 * (0) + 1/4 * (H4N6F1E1) + 2/4 * (0) + 3/4 * (H7N6F1E1L2) + 4/4 * (H7N6F1E1L3 + H7N6F1E2L2) ) ) / ( (H4N6F1E1 + H7N6E1 + H7N6E2 + H7N6E1L2 + H7N6E2L1 + H7N6E3 + H7N6F1E1L2 + H7N6E1L3 + H7N6F1E1L3 + H7N6F1E2L2) ) ) / ( (0/4 * (0) + 1/4 * (H4N6F1E1) + 2/4 * (0) + 3/4 * (0) + 4/4 * (H7N6F1E1L2 + H7N6F1E1L3 + H7N6F1E2L2) ) ) / ( (H4N6F1E1 + H7N6E1 + H7N6E2 + H7N6E1L2 + H7N6E2L1 + H7N6E3 + H7N6F1E1L2 + H7N6E1L3 + H7N6E2L2 + H7N6E3L1 + H7N6F1E1L3 + H7N6F1E2L2) ) )$                                                                                                                                                                                                                                                                                                                                                                                                                                                                                                                                                                                                                                                                                                                                                                                                                                                                                                                                                                                                                                                                                                                                                                                                           |

|                                                      |                                                                                     |                                                                                  |                                                                                                                                                                                                                                                                                                                                                                                                                                                                                                                                                                                                                                                                                                                                                                                                                                                      |
|------------------------------------------------------|-------------------------------------------------------------------------------------|----------------------------------------------------------------------------------|------------------------------------------------------------------------------------------------------------------------------------------------------------------------------------------------------------------------------------------------------------------------------------------------------------------------------------------------------------------------------------------------------------------------------------------------------------------------------------------------------------------------------------------------------------------------------------------------------------------------------------------------------------------------------------------------------------------------------------------------------------------------------------------------------------------------------------------------------|
| A4F0GS                                               | 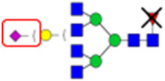   | Sialylation per galactose within non-fucosylated tetra-antennary glycans         | $A4F0GS = ((0/4 * (0) + 1/4 * (H7N6E1) + 2/4 * (H7N6E2) + 3/4 * (H7N6E1L2 + H7N6E2L1 + H7N6E3) + 4/4 * (H7N6E1L3 + H7N6E2L2 + H7N6E3L1)) / (H4N6F1E1 + H7N6E1 + H7N6E2 + H7N6E1L2 + H7N6E2L1 + H7N6E3 + H7N6F1E1L2 + H7N6E1L3 + H7N6E2L2 + H7N6E3L1 + H7N6F1E2L2)) / ((0/4 * (0) + 1/4 * (0) + 2/4 * (0) + 3/4 * (0) + 4/4 * (H7N6E1 + H7N6E2 + H7N6E1L2 + H7N6E2L1 + H7N6E3 + H7N6E1L3 + H7N6E2L2 + H7N6E3L1)) / (H4N6F1E1 + H7N6E1 + H7N6E2 + H7N6E1L2 + H7N6E2L1 + H7N6E3 + H7N6F1E1L2 + H7N6E1L3 + H7N6E2L2 + H7N6E3L1 + H7N6F1E1L3 + H7N6F1E2L2))$                                                                                                                                                                                                                                                                                              |
| <b><math>\alpha</math>2,3-linked sialylation (L)</b> |                                                                                     |                                                                                  |                                                                                                                                                                                                                                                                                                                                                                                                                                                                                                                                                                                                                                                                                                                                                                                                                                                      |
| A2L                                                  |    | $\alpha$ 2,3-sialylation per antenna within diantennary glycans                  | $A2L = ((0/2 * (H3N4 + H3N4F1 + H4N4 + H3N5 + H3N4F2 + H4N4F1 + H5N4 + H3N5F1 + H4N5 + H3N4F1E1 + H5N4F1 + H4N4E1 + H4N5F1 + H5N5 + H4N4F1E1 + H5N4E1 + H5N5F1 + H4N5E1 + H5N4F1E1 + H4N5F1E1 + H5N5E1 + H4N4F1E2 + H5N4E2 + H5N5F1E1 + H5N4F1E2 + H5N5E2 + H5N5F1E2) + 1/2 * (H4N4L1 + H5N4L1 + H5N4F1L1 + H4N4E1L1 + H5N4E1L1 + H3N5F1E1L1 + H4N4F2E1L1 + H5N4F1E1L1) + 2/2 * (H3N4F2L2 + H4N4F2L2 + H5N4F1L2 + H4N5F2L2 + H5N5F2L2)) / ((H3N4 + H3N4F1 + H4N4 + H3N5 + H3N4F2 + H4N4F1 + H5N4 + H3N5F1 + H4N5 + H4N4L1 + H3N4F1E1 + H5N4F1 + H4N4E1 + H4N5F1 + H5N5 + H5N4L1 + H4N4F1E1 + H5N4E1 + H5N5F1 + H4N5E1 + H5N4F1L1 + H4N4E1L1 + H5N4F1E1 + H4N5F1E1 + H3N4F2L2 + H5N5E1 + H5N4E1L1 + H3N5F1E1L1 + H4N4F1E2 + H5N4E2 + H5N5F1E1 + H4N4F2L2 + H5N4F1L2 + H4N4F2E1L1 + H5N4F1E1L1 + H5N4F1E2 + H5N5E2 + H4N5F2L2 + H5N5F1E2 + H5N5F2L2))$ |
| A2FL                                                 |    | $\alpha$ 2,3-sialylation per antenna within fucosylated diantennary glycans      | $A2FL = ((0/2 * (H3N4F1 + H3N4F2 + H4N4F1 + H3N5F1 + H3N4F1E1 + H5N4F1 + H4N5F1 + H4N4F1E1 + H5N5F1 + H5N4F1E1 + H4N5F1E1 + H4N4F1E2 + H5N5F1E1 + H5N4F1E2 + H5N5F1E2) + 1/2 * (H5N4F1L1 + H3N5F1E1L1 + H4N4F2E1L1 + H5N4F1E1L1) + 2/2 * (H3N4F2L2 + H4N4F2L2 + H5N4F1L2 + H4N5F2L2 + H5N5F2L2)) / ((H3N4F1 + H3N4F2 + H4N4F1 + H3N5F1 + H3N4F1E1 + H5N4F1 + H4N5F1 + H4N4F1E1 + H5N5F1 + H5N4F1L1 + H5N4F1E1 + H4N5F1E1 + H3N4F2L2 + H3N5F1E1L1 + H4N4F1E2 + H5N5F1E1 + H4N4F2L2 + H5N4F1L2 + H4N4F2E1L1 + H5N4F1E1L1 + H5N4F1E2 + H5N5E2 + H4N5F2L2 + H5N5F1E2 + H5N5F2L2))$                                                                                                                                                                                                                                                                       |
| A2F0L                                                |    | $\alpha$ 2,3-sialylation per antenna within non-fucosylated diantennary glycans  | $A2F0L = ((0/2 * (H3N4 + H4N4 + H3N5 + H5N4 + H4N5 + H4N4E1 + H5N5 + H5N4E1 + H4N5E1 + H5N5E1 + H5N4E2 + H5N5E2) + 1/2 * (H4N4L1 + H5N4L1 + H4N4E1L1 + H5N4E1L1) + 2/2 * (0)) / ((H3N4 + H4N4 + H3N5 + H5N4 + H4N5 + H4N4L1 + H4N4E1 + H5N5 + H5N4L1 + H5N4E1 + H4N5E1 + H4N4E1L1 + H5N5E1 + H5N4E1L1 + H5N4E2 + H5N5E2))$                                                                                                                                                                                                                                                                                                                                                                                                                                                                                                                           |
| A3L                                                  |    | $\alpha$ 2,3-sialylation per antenna within triantennary glycans                 | $A3L = ((0/3 * (H6N5E1 + H6N5F1E1 + H6N5E2 + H6N5F1E2 + H6N5E3 + H6N5F1E3) + 1/3 * (H6N5E1L1 + H6N5F1E1L1 + H6N5E2L1 + H6N5F1E2L1 + H6N5F2E2L1) + 2/3 * (H6N5F1L2 + H6N5E1L2 + H6N5F1E1L2) + 3/3 * (H6N5F1L3)) / ((H6N5E1 + H6N5F1E1 + H6N5E1L1 + H6N5E2 + H6N5F1L2 + H6N5F1E1L1 + H6N5F1E2 + H6N5E1L2 + H6N5E2L1 + H6N5E3 + H6N5F1L3 + H6N5F1E1L2 + H6N5F1E2L1 + H6N5F1E3 + H6N5F2E2L1))$                                                                                                                                                                                                                                                                                                                                                                                                                                                           |
| A3FL                                                 |  | $\alpha$ 2,3-sialylation per antenna within fucosylated triantennary glycans     | $A3FL = ((0/3 * (H6N5F1E1 + H6N5F1E2 + H6N5F1E3) + 1/3 * (H6N5F1E1L1 + H6N5F1E2L1 + H6N5F2E2L1) + 2/3 * (H6N5F1L2 + H6N5F1E1L2) + 3/3 * (H6N5F1L3)) / ((H6N5F1E1 + H6N5F1L2 + H6N5F1E1L1 + H6N5F1E2 + H6N5F1L3 + H6N5F1E1L2 + H6N5F1E2L1 + H6N5F1E3 + H6N5F2E2L1))$                                                                                                                                                                                                                                                                                                                                                                                                                                                                                                                                                                                  |
| A3F0L                                                |  | $\alpha$ 2,3-sialylation per antenna within non-fucosylated triantennary glycans | $A3F0L = ((0/3 * (H6N5E1 + H6N5E2 + H6N5E3) + 1/3 * (H6N5E1L1 + H6N5E2L1) + 2/3 * (H6N5E1L2) + 3/3 * (0)) / ((H6N5E1 + H6N5E1L1 + H6N5E2 + H6N5E1L2 + H6N5E2L1 + H6N5E3))$                                                                                                                                                                                                                                                                                                                                                                                                                                                                                                                                                                                                                                                                           |
| A4L                                                  |  | $\alpha$ 2,3-sialylation per antenna within tetra-antennary glycans              | $A4L = ((0/4 * (H4N6F1E1 + H7N6E1 + H7N6E2 + H7N6E3) + 1/4 * (H7N6E2L1 + H7N6E3L1) + 2/4 * (H7N6E1L2 + H7N6F1E1L2 + H7N6E2L2 + H7N6F1E1L3) + 4/4 * (0)) / ((H4N6F1E1 + H7N6E1 + H7N6E2 + H7N6E1L2 + H7N6E2L1 + H7N6E3 + H7N6F1E1L2 + H7N6E1L3 + H7N6E2L2 + H7N6E3L1 + H7N6F1E1L3 + H7N6F1E2L2))$                                                                                                                                                                                                                                                                                                                                                                                                                                                                                                                                                     |



|               |  |                                                                                      |                                                                                                                                                                                                                                                                                                                                                                                                                                                                                                                                                                                                                                                                                                                                                                                                                                                                                                                                                                                                                                                                                                                                                                                                                                                                                                                                                                                                                                                                                                                                                                                                                                                                                                                                                                                                                                             |
|---------------|--|--------------------------------------------------------------------------------------|---------------------------------------------------------------------------------------------------------------------------------------------------------------------------------------------------------------------------------------------------------------------------------------------------------------------------------------------------------------------------------------------------------------------------------------------------------------------------------------------------------------------------------------------------------------------------------------------------------------------------------------------------------------------------------------------------------------------------------------------------------------------------------------------------------------------------------------------------------------------------------------------------------------------------------------------------------------------------------------------------------------------------------------------------------------------------------------------------------------------------------------------------------------------------------------------------------------------------------------------------------------------------------------------------------------------------------------------------------------------------------------------------------------------------------------------------------------------------------------------------------------------------------------------------------------------------------------------------------------------------------------------------------------------------------------------------------------------------------------------------------------------------------------------------------------------------------------------|
| <b>A4FL</b>   |  | $\alpha 2,3$ -sialylation per antenna within fucosylated tetra-antennary glycans     | $A4FL = (0/4 * (H4N6F1E1) + 1/4 * (0) + 2/4 * (H7N6F1E1L2 + H7N6F1E2L2) + 3/4 * (H7N6F1E1L3) + 4/4 * (0)) / ((H4N6F1E1 + H7N6E1 + H7N6E2 + H7N6E1L2 + H7N6E2L1 + H7N6E3 + H7N6F1E1L2 + H7N6E1L3 + H7N6E2L2 + H7N6E3L1 + H7N6F1E1L3 + H7N6F1E2L2))$                                                                                                                                                                                                                                                                                                                                                                                                                                                                                                                                                                                                                                                                                                                                                                                                                                                                                                                                                                                                                                                                                                                                                                                                                                                                                                                                                                                                                                                                                                                                                                                          |
| <b>A4F0L</b>  |  | $\alpha 2,3$ -sialylation per antenna within non-fucosylated tetra-antennary glycans | $A4F0L = (0/4 * (H7N6E1 + H7N6E2 + H7N6E3) + 1/4 * (H7N6E2L1 + H7N6E3L1) + 2/4 * (H7N6E1L2 + H7N6E2L2) + 3/4 * (H7N6E1L3) + 4/4 * (0)) / ((H4N6F1E1 + H7N6E1 + H7N6E2 + H7N6E1L2 + H7N6E2L1 + H7N6E3 + H7N6F1E1L2 + H7N6E1L3 + H7N6E2L2 + H7N6E3L1 + H7N6F1E1L3 + H7N6F1E2L2))$                                                                                                                                                                                                                                                                                                                                                                                                                                                                                                                                                                                                                                                                                                                                                                                                                                                                                                                                                                                                                                                                                                                                                                                                                                                                                                                                                                                                                                                                                                                                                             |
| <b>A2GL</b>   |  | $\alpha 2,3$ -sialylation per galactose within diantennary glycans                   | $A2GL = ((0/2 * (H3N4 + H3N4F1 + H4N4 + H3N5 + H3N4F2 + H4N4F1 + H5N4 + H3N5F1 + H4N5 + H3N4F1E1 + H5N4F1 + H4N4E1 + H4N5F1 + H5N5 + H4N4F1E1 + H5N4E1 + H5N5F1 + H4N5E1 + H5N4F1E1 + H4N5F1E1 + H5N5E1 + H4N4F1E2 + H5N4E2 + H5N5F1E1 + H5N4F1E2 + H5N5E2 + H5N5F1E2) + 1/2 * (H4N4L1 + H5N4L1 + H5N4F1L1 + H4N4E1L1 + H5N4E1L1 + H3N5F1E1L1 + H4N4F2E1L1 + H5N4F1E1L1) + 2/2 * (H3N4F2L2 + H4N4F2L2 + H5N4F1L2 + H4N5F2L2 + H5N5F2L2)) / ((H3N4 + H3N4F1 + H4N4 + H3N5 + H3N4F2 + H4N4F1 + H5N4 + H3N5F1 + H4N5 + H4N4L1 + H3N4F1E1 + H5N4F1 + H4N4E1 + H4N5F1 + H5N5 + H5N4L1 + H4N4F1E1 + H5N4E1 + H5N5F1 + H4N5E1 + H5N4F1E1 + H4N5F1E1 + H3N4F2L2 + H5N4F1E1 + H5N4E1 + H5N5F1 + H4N5E1 + H5N4F1E1 + H4N5F1E1 + H3N4F2L2 + H5N5E1 + H5N4E1L1 + H3N5F1E1L1 + H4N4F1E2 + H5N4E2 + H5N5F1E1 + H4N4F2L2 + H5N5E1 + H5N4E1L1 + H3N5F1E1L1 + H4N4F1E2 + H5N4E2 + H5N5F1E1 + H4N4F2L2 + H5N4F1L2 + H4N4F2E1L1 + H5N4F1E1L1 + H5N4F1E2 + H5N5E2 + H4N5F2L2 + H5N5F1E2 + H5N5F2L2)) / ((0/2 * (H3N4 + H3N4F1 + H3N5 + H3N4F2 + H3N5F1) + 1/2 * (H4N4 + H4N4F1 + H4N5 + H4N4L1 + H4N4E1 + H4N5F1 + H4N4F1E1 + H4N5E1 + H4N4E1L1 + H4N5F1E1 + H4N4F2L2 + H4N4F2E1L1 + H4N5F2L2) + 2/2 * (H5N4 + H5N4F1 + H5N5 + H5N4L1 + H5N4E1 + H5N5F1 + H5N4F1L1 + H4N4E1L1 + H5N4F1E1 + H3N4F2L2 + H5N5E1 + H5N4E1L1 + H4N4F1E2 + H5N4E2 + H5N5F1E1 + H4N4F2L2 + H5N4F1L2 + H4N4F2E1L1 + H5N4F1E1L1 + H5N4F1E2 + H5N5E2 + H5N5F1E2 + H5N5F2L2)) / ((H3N4 + H3N4F1 + H4N4 + H3N5 + H3N4F2 + H4N4F1 + H5N4 + H3N5F1 + H4N5 + H4N4L1 + H3N4F1E1 + H5N4F1 + H4N4E1 + H4N5F1 + H5N5 + H5N4L1 + H4N4F1E1 + H5N4E1 + H5N5F1 + H4N5E1 + H5N4F1L1 + H4N4E1L1 + H5N4F1E1 + H4N5F1E1 + H3N4F2L2 + H5N5E1 + H5N4E1L1 + H3N5F1E1L1 + H4N4F1E2 + H5N4E2 + H5N5F1E1 + H4N4F2L2 + H5N4F1L2 + H4N4F2E1L1 + H5N4F1E1L1 + H5N4F1E2 + H5N5E2 + H4N5F2L2 + H5N5F1E2 + H5N5F2L2))$ |
| <b>A2FGL</b>  |  | $\alpha 2,3$ -sialylation per galactose within fucosylated diantennary glycans       | $A2FGL = ((0/2 * (H3N4F1 + H3N4F2 + H4N4F1 + H3N5F1 + H3N4F1E1 + H5N4F1 + H4N5F1 + H4N4F1E1 + H5N5F1 + H5N4F1E1 + H4N5F1E1 + H3N4F2L2 + H3N5F1E1L1 + H4N4F1E2 + H5N5F1E1 + H4N4F2L2 + H5N4F1L2 + H4N4F2E1L1 + H5N4F1E1L1 + H5N4F1E2 + H4N5F2L2 + H5N5F1E2 + H5N5F2L2)) / ((0/2 * (H3N4F1 + H3N4F2 + H3N5F1) + 1/2 * (H4N4F1 + H4N5F1 + H4N4F1E1 + H4N5F1E1 + H4N4F2L2 + H4N4F2E1L1 + H4N5F2L2) + 2/2 * (H5N4F1 + H5N5F1 + H5N4F1L1 + H5N4F1E1 + H3N4F2L2 + H4N4F1E2 + H5N5F1E1 + H4N4F2L2 + H5N4F1L2 + H4N4F2E1L1 + H5N4F1E1L1 + H5N4F1E2 + H5N5E2 + H5N5F1E2 + H5N5F2L2)) / ((H3N4F1 + H3N4F2 + H4N4F1 + H3N5F1 + H3N4F1E1 + H5N4F1 + H4N5F1 + H4N4F1E1 + H5N5F1 + H5N4F1L1 + H5N4F1E1 + H4N5F1E1 + H4N4F2L2 + H3N5F1E1L1 + H4N4F1E2 + H5N5F1E1 + H4N4F2L2 + H5N4F1L2 + H4N4F2E1L1 + H5N4F1E1L1 + H5N4F1E2 + H5N5E2 + H5N5F1E2 + H5N5F2L2)) / ((H3N4F1 + H3N4F2 + H4N4F1 + H3N5F1 + H3N4F1E1 + H5N4F1 + H4N5F1 + H4N4F1E1 + H5N5F1 + H5N4F1L1 + H5N4F1E1 + H4N5F1E1 + H3N4F2L2 + H3N5F1E1L1 + H4N4F1E2 + H5N5F1E1 + H4N4F2L2 + H5N4F1L2 + H4N4F2E1L1 + H5N4F1E1L1 + H5N4F1E2 + H5N5E2 + H5N5F1E2 + H5N5F2L2 + H5N5F1E2 + H5N5F2L2))$                                                                                                                                                                                                                                                                                                                                                                                                                                                                                                                                                                                                                                                                                                       |
| <b>A2F0GL</b> |  | $\alpha 2,3$ -sialylation per galactose within non-fucosylated diantennary glycans   | $A2F0GL = ((0/2 * (H3N4 + H4N4 + H3N5 + H5N4 + H4N5 + H4N4E1 + H5N5 + H5N4E1 + H4N5E1 + H5N5E1 + H5N4E2 + H5N5E2) + 1/2 * (H4N4L1 + H5N4L1 + H4N4E1L1 + H5N4E1L1) + 2/2 * (0)) / ((H3N4 + H4N4 + H3N5 + H5N4 + H4N5 + H4N4L1 + H4N4E1 + H5N5 + H5N4L1 + H5N4E1 + H4N5E1 + H4N4E1L1 + H5N5E1 + H5N4E1L1 + H5N4E2 + H5N5E2)) / ((0/2 * (H3N4 + H3N5) + 1/2 * (H4N4 + H4N5 + H4N4L1 + H4N4E1 + H4N5E1 + H4N4E1L1 + H5N4E1 + H4N5E1 + H4N4E1L1 + H5N5E1 + H5N4E1L1 + H5N4E2 + H5N5E2)) / ((H3N4 + H4N4 + H3N5 + H5N4 + H4N5 + H4N4L1 + H4N4E1 + H5N5 + H5N4L1 + H5N4E1 + H4N5E1 + H4N4E1L1 + H5N5E1 + H5N4E1L1 + H5N4E2 + H5N5E2))$                                                                                                                                                                                                                                                                                                                                                                                                                                                                                                                                                                                                                                                                                                                                                                                                                                                                                                                                                                                                                                                                                                                                                                                                             |

|                                                      |  |                                                                                       |                                                                                                                                                                                                                                                                                                                                                                                                                                                                                                                                                                                                                                                                                                                                                                                                                                                               |
|------------------------------------------------------|--|---------------------------------------------------------------------------------------|---------------------------------------------------------------------------------------------------------------------------------------------------------------------------------------------------------------------------------------------------------------------------------------------------------------------------------------------------------------------------------------------------------------------------------------------------------------------------------------------------------------------------------------------------------------------------------------------------------------------------------------------------------------------------------------------------------------------------------------------------------------------------------------------------------------------------------------------------------------|
| A4FGL                                                |  | $\alpha$ 2,3-sialylation per galactose within fucosylated tetra-antennary glycans     | $A4FGL = ( ( 0/4 * ( H4N6F1E1 ) + 1/4 * ( 0 ) + 2/4 * ( H7N6F1E1L2 + H7N6F1E2L2 ) + 3/4 * ( H7N6F1E1L3 ) + 4/4 * ( 0 ) ) / ( H4N6F1E1 + H7N6E1 + H7N6E2 + H7N6E1L2 + H7N6E2L1 + H7N6E3 + H7N6F1E1L2 + H7N6E1L3 + H7N6E2L2 + H7N6E3L1 + H7N6F1E1L3 + H7N6F1E2L2 ) ) / ( ( 0/4 * ( 0 ) + 1/4 * ( H4N6F1E1 ) + 2/4 * ( 0 ) + 3/4 * ( 0 ) + 4/4 * ( H7N6F1E1L2 + H7N6F1E1L3 + H7N6F1E2L2 ) ) / ( H4N6F1E1 + H7N6E1 + H7N6E2 + H7N6E1L2 + H7N6E2L1 + H7N6E3 + H7N6F1E1L2 + H7N6E1L3 + H7N6E2L2 + H7N6E3L1 + H7N6F1E1L3 + H7N6F1E2L2 ) ) )$                                                                                                                                                                                                                                                                                                                         |
| A4F0GL                                               |  | $\alpha$ 2,3-sialylation per galactose within non-fucosylated tetra-antennary glycans | $A4F0GL = ( ( 0/4 * ( H7N6E1 + H7N6E2 + H7N6E3 ) + 1/4 * ( H7N6E2L1 + H7N6E3L1 ) + 2/4 * ( H7N6E1L2 + H7N6E2L2 ) + 3/4 * ( H7N6E1L3 ) + 4/4 * ( 0 ) ) / ( H4N6F1E1 + H7N6E1 + H7N6E2 + H7N6E1L2 + H7N6E2L1 + H7N6E3 + H7N6F1E1L2 + H7N6E1L3 + H7N6E2L2 + H7N6E3L1 + H7N6F1E1L3 + H7N6F1E2L2 ) ) / ( ( 0/4 * ( 0 ) + 1/4 * ( 0 ) + 2/4 * ( 0 ) + 3/4 * ( 0 ) + 4/4 * ( H7N6E1 + H7N6E2 + H7N6E1L2 + H7N6E2L1 + H7N6E3 + H7N6E1L3 + H7N6E2L2 + H7N6E3L1 ) ) / ( H4N6F1E1 + H7N6E1 + H7N6E2 + H7N6E1L2 + H7N6E2L1 + H7N6E3 + H7N6F1E1L2 + H7N6E1L3 + H7N6E2L2 + H7N6E3L1 + H7N6F1E1L3 + H7N6F1E2L2 ) ) )$                                                                                                                                                                                                                                                        |
| <b><math>\alpha</math>2,6-linked sialylation (E)</b> |  |                                                                                       |                                                                                                                                                                                                                                                                                                                                                                                                                                                                                                                                                                                                                                                                                                                                                                                                                                                               |
| A2E                                                  |  | $\alpha$ 2,6-sialylation per antenna within diantennary glycans                       | $A2E = ( 0/2 * ( H3N4 + H3N4F1 + H4N4 + H3N5 + H3N4F2 + H4N4F1 + H5N4 + H3N5F1 + H4N5 + H4N4L1 + H5N4F1 + H4N5F1 + H5N5 + H5N4L1 + H5N5F1 + H5N4F1L1 + H3N4F2L2 + H4N4F2L2 + H5N4F1L2 + H4N5F2L2 + H5N5F2L2 ) + 1/2 * ( H3N4F1E1 + H4N4E1 + H4N4F1E1 + H5N4E1 + H4N5E1 + H4N4E1L1 + H5N4F1E1 + H4N5F1E1 + H5N5E1 + H5N4E1L1 + H3N5F1E1L1 + H5N5F1E1 + H4N4F2E1L1 + H5N4F1E1L1 ) + 2/2 * ( H4N4F1E2 + H5N4E2 + H5N4F1E2 + H5N5E2 + H5N5F1E2 ) ) / ( H3N4 + H3N4F1 + H4N4 + H3N5 + H3N4F2 + H4N4F1 + H5N4 + H3N5F1 + H4N5 + H4N4L1 + H3N4F1E1 + H5N4F1 + H4N4E1 + H4N5F1 + H5N5 + H5N4L1 + H4N4F1E1 + H5N4E1 + H5N5F1 + H4N5E1 + H5N4F1L1 + H4N4E1L1 + H5N4F1E1 + H4N5F1E1 + H3N4F2L2 + H5N5E1 + H5N4E1L1 + H3N5F1E1L1 + H4N4F1E2 + H5N4E2 + H5N5F1E1 + H4N4F2L2 + H5N4F1L2 + H4N4F2E1L1 + H5N4F1E1L1 + H5N4F1E2 + H5N5E2 + H4N5F2L2 + H5N5F1E2 + H5N5F2L2 ) )$ |
| A2FE                                                 |  | $\alpha$ 2,6-sialylation per antenna within fucosylated diantennary glycans           | $A2FE = ( 0/2 * ( H3N4F1 + H3N4F2 + H4N4F1 + H3N5F1 + H5N4F1 + H4N5F1 + H5N5F1 + H5N4F1L1 + H3N4F2L2 + H4N4F2L2 + H5N4F1L2 + H4N5F2L2 + H5N5F2L2 ) + 1/2 * ( H3N4F1E1 + H4N4F1E1 + H5N4F1E1 + H4N5F1E1 + H3N5F1E1L1 + H5N5F1E1 + H4N4F2E1L1 + H5N4F1E1L1 ) + 2/2 * ( H4N4F1E2 + H5N4F1E2 + H5N5F1E2 ) ) / ( H3N4F1 + H3N4F2 + H4N4F1 + H3N5F1 + H3N4F1E1 + H5N4F1 + H4N5F1 + H4N4F1E1 + H5N5F1 + H5N4F1L1 + H5N4F1E1 + H4N5F1E1 + H3N4F2L2 + H3N5F1E1L1 + H4N4F1E2 + H5N5F1E1 + H4N4F2L2 + H5N4F1L2 + H4N4F2E1L1 + H5N4F1E1L1 + H5N4F1E2 + H4N5F2L2 + H5N5F1E2 + H5N5F2L2 ) )$                                                                                                                                                                                                                                                                                |
| A2F0E                                                |  | $\alpha$ 2,6-sialylation per antenna within non-fucosylated diantennary glycans       | $A2F0E = ( 0/2 * ( H3N4 + H4N4 + H3N5 + H5N4 + H4N5 + H4N4L1 + H5N5 + H5N4L1 ) + 1/2 * ( H4N4E1 + H5N4E1 + H4N5E1 + H4N4E1L1 + H5N5E1 + H5N4E1L1 ) + 2/2 * ( H5N4E2 + H5N5E2 ) ) / ( H3N4 + H4N4 + H3N5 + H5N4 + H4N5 + H4N4L1 + H4N4E1 + H5N5 + H5N4L1 + H5N4E1 + H4N5E1 + H4N4E1L1 + H5N5E1 + H5N4E1L1 + H5N4E2 + H5N5E2 ) )$                                                                                                                                                                                                                                                                                                                                                                                                                                                                                                                               |
| A3E                                                  |  | $\alpha$ 2,6-sialylation per antenna within triantennary glycans                      | $A3E = ( 0/3 * ( H6N5F1L2 + H6N5F1L3 ) + 1/3 * ( H6N5E1 + H6N5F1E1 + H6N5E1L1 + H6N5F1E1L1 + H6N5E1L2 + H6N5F1E1L2 ) + 2/3 * ( H6N5E2 + H6N5F1E2 + H6N5E2L1 + H6N5F1E2L1 + H6N5F2E2L1 ) + 3/3 * ( H6N5E3 + H6N5F1E3 ) ) / ( H6N5E1 + H6N5F1E1 + H6N5E1L1 + H6N5E2 + H6N5F1L2 + H6N5F1E1L1 + H6N5F1E2 + H6N5E1L2 + H6N5E2L1 + H6N5E3 + H6N5F1L3 + H6N5F1E1L2 + H6N5F1E2L1 + H6N5F1E3 + H6N5F2E2L1 ) )$                                                                                                                                                                                                                                                                                                                                                                                                                                                         |
| A3FE                                                 |  | $\alpha$ 2,6-sialylation per antenna within fucosylated triantennary glycans          | $A3FE = ( 0/3 * ( H6N5F1L2 + H6N5F1L3 ) + 1/3 * ( H6N5F1E1 + H6N5F1E1L1 + H6N5F1E1L2 ) + 2/3 * ( H6N5F1E2 + H6N5F1E2L1 + H6N5F2E2L1 ) + 3/3 * ( H6N5F1E3 ) ) / ( H6N5F1E1 + H6N5F1L2 + H6N5F1E1L1 + H6N5F1E2 + H6N5F1L3 + H6N5F1E1L2 + H6N5F1E2L1 + H6N5F1E3 + H6N5F2E2L1 ) )$                                                                                                                                                                                                                                                                                                                                                                                                                                                                                                                                                                                |
| A3F0E                                                |  | $\alpha$ 2,6-sialylation per antenna within non-fucosylated triantennary glycans      | $A3F0E = ( 0/3 * ( 0 ) + 1/3 * ( H6N5E1 + H6N5E1L1 + H6N5E1L2 ) + 2/3 * ( H6N5E2 + H6N5E2L1 ) + 3/3 * ( H6N5E3 ) ) / ( H6N5E1 + H6N5E1L1 + H6N5E2 + H6N5E1L2 + H6N5E2L1 + H6N5E3 ) )$                                                                                                                                                                                                                                                                                                                                                                                                                                                                                                                                                                                                                                                                         |

|        |                                                                                     |                                                                                     |                                                                                                                                                                                                                                                                                                                                                                                                                                                                                                                                                                                                                                                                                                                                                                                                                                                                                                                                                                                                                                                                                                                                                                                                                                                                                                                                                                                                                                                                                                                                                                                                                                                                                                                                          |
|--------|-------------------------------------------------------------------------------------|-------------------------------------------------------------------------------------|------------------------------------------------------------------------------------------------------------------------------------------------------------------------------------------------------------------------------------------------------------------------------------------------------------------------------------------------------------------------------------------------------------------------------------------------------------------------------------------------------------------------------------------------------------------------------------------------------------------------------------------------------------------------------------------------------------------------------------------------------------------------------------------------------------------------------------------------------------------------------------------------------------------------------------------------------------------------------------------------------------------------------------------------------------------------------------------------------------------------------------------------------------------------------------------------------------------------------------------------------------------------------------------------------------------------------------------------------------------------------------------------------------------------------------------------------------------------------------------------------------------------------------------------------------------------------------------------------------------------------------------------------------------------------------------------------------------------------------------|
| A4E    | 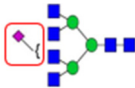   | $\alpha$ 2,6-sialylation per antenna within tetra-antennary glycans                 | $A4E = (0/4 * (0) + 1/4 * (H4N6F1E1 + H7N6E1 + H7N6E1L2 + H7N6F1E1L2 + H7N6E1L3 + H7N6F1E1L3) + 2/4 * (H7N6E2 + H7N6E2L1 + H7N6E2L2 + H7N6F1E2L2) + 3/4 * (H7N6E3 + H7N6E3L1) + 4/4 * (0)) / (H4N6F1E1 + H7N6E1 + H7N6E2 + H7N6E1L2 + H7N6E2L1 + H7N6E3 + H7N6F1E1L2 + H7N6E1L3 + H7N6E2L2 + H7N6E3L1 + H7N6F1E1L3 + H7N6F1E2L2)$                                                                                                                                                                                                                                                                                                                                                                                                                                                                                                                                                                                                                                                                                                                                                                                                                                                                                                                                                                                                                                                                                                                                                                                                                                                                                                                                                                                                        |
| A4FE   |    | $\alpha$ 2,6-sialylation per antenna within fucosylated tetra-antennary glycans     | $A4FE = (0/4 * (0) + 1/4 * (H4N6F1E1 + H7N6F1E1L2 + H7N6F1E1L3) + 2/4 * (H7N6F1E2L2) + 3/4 * (0) + 4/4 * (0)) / (H4N6F1E1 + H7N6E1 + H7N6E2 + H7N6E1L2 + H7N6E2L1 + H7N6E3 + H7N6F1E1L2 + H7N6E1L3 + H7N6E2L2 + H7N6E3L1 + H7N6F1E1L3 + H7N6F1E2L2)$                                                                                                                                                                                                                                                                                                                                                                                                                                                                                                                                                                                                                                                                                                                                                                                                                                                                                                                                                                                                                                                                                                                                                                                                                                                                                                                                                                                                                                                                                     |
| A4F0E  |    | $\alpha$ 2,6-sialylation per antenna within non-fucosylated tetra-antennary glycans | $A4F0E = (0/4 * (0) + 1/4 * (H7N6E1 + H7N6E1L2 + H7N6E1L3) + 2/4 * (H7N6E2 + H7N6E2L1 + H7N6E2L2) + 3/4 * (H7N6E3 + H7N6E3L1) + 4/4 * (0)) / (H4N6F1E1 + H7N6E1 + H7N6E2 + H7N6E1L2 + H7N6E2L1 + H7N6E3 + H7N6F1E1L2 + H7N6E1L3 + H7N6E2L2 + H7N6E3L1 + H7N6F1E1L3 + H7N6F1E2L2)$                                                                                                                                                                                                                                                                                                                                                                                                                                                                                                                                                                                                                                                                                                                                                                                                                                                                                                                                                                                                                                                                                                                                                                                                                                                                                                                                                                                                                                                        |
| A2GE   |    | $\alpha$ 2,6-sialylation per galactose within diantennary glycans                   | $A2GE = ((0/2 * (H3N4 + H3N4F1 + H4N4 + H3N5 + H3N4F2 + H4N4F1 + H5N4 + H3N5F1 + H4N5 + H4N4L1 + H5N4F1 + H4N5F1 + H5N5 + H5N4L1 + H5N5F1 + H5N4F1L1 + H3N4F2L2 + H4N4F2L2 + H5N4F1L2 + H4N5F2L2 + H5N5F2L2) + 1/2 * (H3N4F1E1 + H4N4E1 + H4N4F1E1 + H5N4E1 + H4N5E1 + H4N4E1L1 + H5N4F1E1 + H4N5F1E1 + H5N5E1 + H5N4E1L1 + H3N5F1E1L1 + H5N5F1E1 + H4N4F2E1L1 + H5N4F1E1L1) + 2/2 * (H4N4F1E2 + H5N4E2 + H5N4F1E2 + H5N5E2 + H5N5F1E2)) / (H3N4 + H3N4F1 + H4N4 + H3N5 + H3N4F2 + H4N4F1 + H5N4 + H3N5F1 + H4N5 + H4N4L1 + H3N4F1E1 + H5N4F1 + H4N4E1 + H4N5F1 + H5N5 + H5N4L1 + H4N4F1E1 + H5N4E1 + H5N5F1 + H4N5E1 + H5N4F1L1 + H4N4E1L1 + H5N4F1E1 + H4N5F1E1 + H3N4F2L2 + H5N5E1 + H5N4E1L1 + H3N5F1E1L1 + H4N4F1E2 + H4N4F2L2 + H5N4F1L2 + H4N4F2E1L1 + H5N4F1E1L1 + H3N5F1E1L1 + H4N4F1E2 + H5N4E2 + H5N5F1E1 + H4N4F2L2 + H5N4F1L2 + H4N4F2E1L1 + H5N4F1E1L1 + H5N4F1E2 + H5N5E2 + H4N5F2L2) / ((0/2 * (H3N4 + H3N4F1 + H3N5 + H3N4F2 + H3N5F1) + 1/2 * (H4N4 + H4N4F1 + H4N5 + H4N4L1 + H4N4E1 + H4N5F1 + H4N4F1E1 + H4N5E1 + H4N4E1L1 + H4N5F1E1 + H4N4F1E2 + H4N4F2L2 + H4N4F2E1L1 + H4N5F2L2) + 2/2 * (H5N4 + H5N4F1 + H5N5 + H5N4L1 + H5N4E1 + H5N5F1 + H5N4F1L1 + H4N4E1L1 + H5N4F1E1 + H3N4F2L2 + H5N5E1 + H5N4E1L1 + H4N4F1E2 + H5N4E2 + H5N5F1E1 + H4N4F2L2 + H5N4F1L2 + H4N4F2E1L1 + H5N4F1E1L1 + H5N4F1E2 + H5N5E2 + H4N5F2L2)) / (H3N4 + H3N4F1 + H4N4 + H3N5 + H3N4F2 + H4N4F1 + H5N4 + H3N5F1 + H4N5 + H4N4L1 + H3N4F1E1 + H5N4F1 + H4N4E1 + H4N5F1 + H5N5 + H5N4L1 + H4N4F1E1 + H5N4E1 + H5N5F1 + H4N5E1 + H5N4F1L1 + H4N4E1L1 + H5N4F1E1 + H4N5F1E1 + H3N4F2L2 + H5N5E1 + H5N4E1L1 + H3N5F1E1L1 + H4N4F1E2 + H5N4E2 + H5N5F1E1 + H4N4F2L2 + H5N4F1L2 + H4N4F2E1L1 + H5N4F1E1L1 + H5N4F1E2 + H5N5E2 + H4N5F2L2))$ |
| A2FGE  |  | $\alpha$ 2,6-sialylation per galactose within fucosylated diantennary glycans       | $A2FGE = ((0/2 * (H3N4F1 + H3N4F2 + H4N4F1 + H3N5F1 + H5N4F1 + H4N5F1 + H5N5F1 + H5N4F1L1 + H3N4F2L2 + H4N4F2L2 + H5N4F1L2 + H4N5F2L2 + H5N5F2L2) + 1/2 * (H3N4F1E1 + H4N4F1E1 + H5N4F1E1 + H4N5F1E1 + H3N5F1E1L1 + H5N5F1E1 + H4N4F2E1L1 + H5N4F1E1L1) + 2/2 * (H4N4F1E2 + H5N4F1E2 + H5N5F1E2)) / (H3N4F1 + H3N4F2 + H4N4F1 + H3N5F1 + H3N4F1E1 + H5N4F1 + H4N5F1 + H5N4F1L1 + H5N4F1E1 + H4N5F1E1 + H3N4F2L2 + H3N5F1E1L1 + H4N4F1E2 + H5N5F1E1 + H4N4F2L2 + H5N4F1L2 + H4N4F2E1L1 + H5N4F1E1L1 + H5N4F1E2 + H5N5E2 + H4N5F2L2) / ((0/2 * (H3N4F1 + H3N4F2 + H3N5F1) + 1/2 * (H4N4F1 + H4N5F1 + H4N4F1E1 + H4N5F1E1 + H4N4F1E2 + H4N4F2L2 + H4N4F2E1L1 + H4N5F2L2) + 2/2 * (H5N4F1 + H5N5F1 + H5N4F1L1 + H5N4F1E1 + H3N4F2L2 + H4N4F1E2 + H5N5F1E1 + H4N4F2L2 + H5N4F1L2 + H4N4F2E1L1 + H5N4F1E1L1 + H5N4F1E2 + H5N5E2 + H4N5F2L2)) / (H3N4F1 + H3N4F2 + H4N4F1 + H3N5F1 + H3N4F1E1 + H5N4F1 + H4N5F1 + H4N4F1E1 + H5N5F1 + H5N4F1L1 + H5N4F1E1 + H4N5F1E1 + H3N4F2L2 + H3N5F1E1L1 + H4N4F1E2 + H5N5F1E1 + H4N4F2L2 + H5N4F1L2 + H4N4F2E1L1 + H5N4F1E1L1 + H5N4F1E2 + H4N5F2L2 + H5N5F1E2 + H5N5F2L2))$                                                                                                                                                                                                                                                                                                                                                                                                                                                                                                                                                                                                                               |
| A2F0GE |  | $\alpha$ 2,6-sialylation per galactose within non-fucosylated diantennary glycans   | $A2F0GE = ((0/2 * (H3N4 + H4N4 + H3N5 + H5N4 + H4N5 + H4N4L1 + H5N5 + H5N4L1) + 1/2 * (H4N4E1 + H5N4E1 + H4N5E1 + H4N4E1L1 + H5N5E1 + H5N4E1L1) + 2/2 * (H5N4E2 + H5N5E2)) / (H3N4 + H4N4 + H3N5 + H5N4 + H4N5 + H4N4L1 + H4N4E1 + H5N5 + H5N4L1 + H5N4E1 + H4N5E1 + H4N4E1L1 + H5N5E1 + H5N4E1L1 + H5N4E2 + H5N5E2)) / ((0/2 * (H3N4 + H3N5) + 1/2 * (H4N4 + H4N5 + H4N4L1 + H4N4E1 + H4N5E1 + H4N4E1L1) + 2/2 * (H5N4 + H5N5 + H5N4L1 + H5N4E1 + H4N4E1L1 + H5N5E1 + H5N4E1L1 + H5N4E2 + H5N5E2)) / (H3N4 + H4N4 + H3N5 + H5N4 + H4N5 + H4N4L1 + H4N4E1 + H5N5 + H5N4L1 + H5N4E1 + H4N5E1 + H4N4E1L1 + H5N5E1 + H5N4E1L1 + H5N4E2 + H5N5E2))$                                                                                                                                                                                                                                                                                                                                                                                                                                                                                                                                                                                                                                                                                                                                                                                                                                                                                                                                                                                                                                                                                          |

|               |                                                                                   |                                                                                       |                                                                                                                                                                                                                                                                                                                                                                                                                                                                                                                                                                                                                                     |
|---------------|-----------------------------------------------------------------------------------|---------------------------------------------------------------------------------------|-------------------------------------------------------------------------------------------------------------------------------------------------------------------------------------------------------------------------------------------------------------------------------------------------------------------------------------------------------------------------------------------------------------------------------------------------------------------------------------------------------------------------------------------------------------------------------------------------------------------------------------|
| <b>A4FGE</b>  | 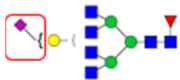 | $\alpha$ 2,6-sialylation per galactose within fucosylated tetra-antennary glycans     | $\begin{aligned} A4FGE = & ((0/4 * (0) + 1/4 * (H4N6F1E1 + H7N6F1E1L2 + H7N6F1E1L3)) + 2/4 * (H7N6F1E2L2)) + 3/4 * (0) + 4/4 * (0)) / \\ & (H4N6F1E1 + H7N6E1 + H7N6E2 + H7N6E1L2 + H7N6E2L1 + H7N6E3 + H7N6F1E1L2 + H7N6E1L3 + H7N6E2L2 + \\ & H7N6E3L1 + H7N6F1E1L3 + H7N6F1E2L2)) / ((0/4 * (0) + 1/4 * (H4N6F1E1)) + 2/4 * (0) + 3/4 * (0) + 4/4 * (H7N6F1E1L2 \\ & + H7N6F1E1L3 + H7N6F1E2L2)) / (H4N6F1E1 + H7N6E1 + H7N6E2 + H7N6E1L2 + H7N6E2L1 + H7N6E3 + H7N6F1E1L2 \\ & + H7N6E1L3 + H7N6E2L2 + H7N6E3L1 + H7N6F1E1L3 + H7N6F1E2L2)) \end{aligned}$                                                                      |
| <b>A4F0GE</b> |  | $\alpha$ 2,6-sialylation per galactose within non-fucosylated tetra-antennary glycans | $\begin{aligned} A4F0GE = & ((0/4 * (0) + 1/4 * (H7N6E1 + H7N6E1L2 + H7N6E1L3)) + 2/4 * (H7N6E2 + H7N6E2L1 + H7N6E2L2)) + 3/4 * \\ & (H7N6E3 + H7N6E3L1) + 4/4 * (0)) / (H4N6F1E1 + H7N6E1 + H7N6E2 + H7N6E1L2 + H7N6E2L1 + H7N6E3 + H7N6F1E1L2 \\ & + H7N6E1L3 + H7N6E2L2 + H7N6E3L1 + H7N6F1E1L3 + H7N6F1E2L2)) / ((0/4 * (0) + 1/4 * (0) + 2/4 * (0) + 3/4 * (0) + 4/4 \\ & * (H7N6E1 + H7N6E2 + H7N6E1L2 + H7N6E2L1 + H7N6E3 + H7N6E1L3 + H7N6E2L2 + H7N6E3L1)) / (H4N6F1E1 + \\ & H7N6E1 + H7N6E2 + H7N6E1L2 + H7N6E2L1 + H7N6E3 + H7N6F1E1L2 + H7N6E1L3 + H7N6E2L2 + H7N6E3L1 + \\ & H7N6F1E1L3 + H7N6F1E2L2)) \end{aligned}$ |

**Table S3.** Data quality control. The data quality was checked by the measurement of a standard sample assessed by calculating the mean, SD (standard deviation) and CV (coefficient of variance) for all glycans.

| Directly detected glycan | Average (Relative abundance) | SD          | RSD (CV)    | Derived glycan | Average (Relative abundance) | SD          | RSD (CV)    |
|--------------------------|------------------------------|-------------|-------------|----------------|------------------------------|-------------|-------------|
| H3N3                     | 0.039607833                  | 0.01739846  | 0.439268152 | TM             | 0.023171143                  | 0.00257282  | 0.111035518 |
| H5N2                     | 0.451708911                  | 0.056776162 | 0.125691924 | THy            | 0.012651728                  | 0.00071093  | 0.05619236  |
| H3N3F1                   | 0.07902041                   | 0.017572557 | 0.222379977 | MHy            | 1.835362385                  | 0.193246285 | 0.105290534 |
| H4N3                     | 0.110482431                  | 0.037448074 | 0.338950487 | MM             | 6.92791362                   | 0.053928802 | 0.007784277 |
| H3N4                     | 0.250042582                  | 0.053446552 | 0.213749799 | CA1            | 0.009665167                  | 0.000819922 | 0.084832639 |
| H6N2                     | 0.728890248                  | 0.084673577 | 0.1161678   | CA2            | 0.841862335                  | 0.010030586 | 0.011914758 |
| H4N3F1                   | 0.085699177                  | 0.019654924 | 0.229347876 | CA3            | 0.118313529                  | 0.006867529 | 0.058045171 |
| H3N3E1                   | 0.153001481                  | 0.022880891 | 0.149546862 | CA4            | 0.022235346                  | 0.002589532 | 0.116460161 |
| H5N3                     | 0.135301779                  | 0.034397906 | 0.254230999 | CF             | 0.402432253                  | 0.008984035 | 0.022324341 |
| H3N4F1                   | 2.64115728                   | 0.272798686 | 0.103287558 | CFa            | 0.010747781                  | 0.000500058 | 0.046526598 |
| H4N4                     | 0.348785435                  | 0.035490834 | 0.101755494 | CB             | 0.11385348                   | 0.003424831 | 0.030081035 |
| H3N5                     | 0.183147421                  | 0.037997131 | 0.207467464 | CG             | 0.957487837                  | 0.004609285 | 0.004813936 |
| H7N2                     | 0.210587231                  | 0.033788086 | 0.160446983 | CS             | 0.836809125                  | 0.012313748 | 0.014715122 |
| H3N3F1E1                 | 0.076019004                  | 0.013450421 | 0.176934973 | A2F            | 0.395732228                  | 0.009904865 | 0.025029211 |
| H5N3F1                   | 0.057499464                  | 0.013416186 | 0.233327144 | A3F            | 0.448321775                  | 0.020320597 | 0.04532592  |
| H4N3E1                   | 0.392010177                  | 0.021838081 | 0.055707944 | A4F            | 0.556221521                  | 0.02854712  | 0.051323293 |
| H6N3                     | 0.09135846                   | 0.013155864 | 0.144002694 | A2Fa           | 0.009854487                  | 0.000638445 | 0.064787218 |
| H3N4F2                   | 0.059534349                  | 0.010787269 | 0.181194032 | A3Fa           | 0.010346811                  | 0.00141354  | 0.136616049 |
| H4N4F1                   | 5.080758527                  | 0.37481287  | 0.073771046 | A2S0F          | 0.896163614                  | 0.007482844 | 0.008349864 |
| H5N4                     | 0.393766922                  | 0.054741086 | 0.139019007 | A2L0F          | 0.384038385                  | 0.011099399 | 0.028901795 |
| H3N5F1                   | 0.923986677                  | 0.077000296 | 0.083334855 | A3L0F          | 0.224215592                  | 0.005530963 | 0.024668055 |
| H3N3F2L1                 | 0.119062465                  | 0.019410045 | 0.163024052 | A4L0F          | 0.807602865                  | 0.024087049 | 0.029825364 |
| H4N5                     | 0.244791584                  | 0.039401788 | 0.160960549 | A2E0F          | 0.891993469                  | 0.00658423  | 0.007381478 |
| H4N3F1L1                 | 0.087120812                  | 0.013450119 | 0.154384683 | A2SF           | 0.276536338                  | 0.003986308 | 0.014415132 |
| H5N3L1                   | 0.047287876                  | 0.009047412 | 0.191326251 | A2LF           | 0.494604971                  | 0.010597764 | 0.021426724 |
| H8N2                     | 0.383977767                  | 0.038621779 | 0.100583374 | A3LF           | 0.546948991                  | 0.028805176 | 0.052665196 |
| H4N3F1E1                 | 0.100729097                  | 0.007207029 | 0.071548627 | A4LF           | 0.373671647                  | 0.023645095 | 0.063277734 |
| H4N4L1                   | 0.032585383                  | 0.006509056 | 0.199753857 | A2EF           | 0.256492891                  | 0.003872188 | 0.015096668 |
| H5N3E1                   | 0.277026178                  | 0.019019548 | 0.068656139 | A3EF           | 0.436141435                  | 0.022286074 | 0.051098272 |
| H3N4F1E1                 | 0.167696408                  | 0.036022883 | 0.214810105 | A2B            | 0.135329688                  | 0.004873226 | 0.036010027 |
| H5N4F1                   | 2.996973789                  | 0.210080162 | 0.07009743  | A2F0B          | 0.046662052                  | 0.005986828 | 0.128301852 |
| H4N4E1                   | 0.428495408                  | 0.015326874 | 0.035769051 | A2FB           | 0.27114578                   | 0.00577779  | 0.021308796 |
| H4N5F1                   | 1.596146621                  | 0.083860992 | 0.052539655 | A2S0B          | 0.24033785                   | 0.006323956 | 0.026312776 |
| H5N5                     | 0.17944697                   | 0.019337809 | 0.107763362 | A2SB           | 0.110467034                  | 0.004502474 | 0.040758528 |
| H5N3F1L1                 | 0.352451012                  | 0.044116485 | 0.125170544 | A2F0S0B        | 0.379274422                  | 0.023926931 | 0.063086066 |
| H6N3L1                   | 0.078911285                  | 0.008164135 | 0.103459668 | A2F0SB         | 0.035348255                  | 0.00462745  | 0.130910286 |
| H9N2                     | 0.543036184                  | 0.060634909 | 0.111659058 | A2FS0B         | 0.224362711                  | 0.004968559 | 0.022145209 |
| H5N4L1                   | 0.265903639                  | 0.011632304 | 0.043746312 | A2FSB          | 0.307040023                  | 0.005745942 | 0.018713985 |
| H6N3E1                   | 0.224749504                  | 0.009683546 | 0.04308595  | A2G            | 0.895715802                  | 0.009040692 | 0.010093259 |
| H4N4F1E1                 | 0.71101816                   | 0.023274658 | 0.032734267 | A4G            | 0.743469525                  | 0.038891684 | 0.052311067 |
| H5N4E1                   | 4.727910264                  | 0.159005274 | 0.033631195 | A2F0G          | 0.97790322                   | 0.003144081 | 0.003215125 |
| H5N5F1                   | 0.599817241                  | 0.030722848 | 0.051220349 | A4F0G          | 0.442683432                  | 0.02860366  | 0.064614255 |

|            |             |             |             |         |             |             |             |
|------------|-------------|-------------|-------------|---------|-------------|-------------|-------------|
| H4N5E1     | 0.310326286 | 0.060089352 | 0.193632813 | A2FG    | 0.770613216 | 0.014317192 | 0.01857896  |
| H5N4F1L1   | 0.565074338 | 0.019555364 | 0.034606711 | A2S0G   | 0.503617859 | 0.012070807 | 0.023968186 |
| H4N4E1L1   | 0.088133361 | 0.00923248  | 0.104755793 | A2SG    | 0.989179786 | 0.001271709 | 0.00128562  |
| H5N4F1E1   | 3.398623712 | 0.100344617 | 0.029525074 | A2F0S0G | 0.545446389 | 0.026553904 | 0.048682886 |
| H4N5F1E1   | 0.368827992 | 0.017663701 | 0.047891434 | A2FS0G  | 0.498886436 | 0.010727887 | 0.021503665 |
| H3N4F2L2   | 0.087005775 | 0.048576333 | 0.558311594 | A2F0SG  | 0.992761545 | 0.000835185 | 0.000841274 |
| H5N5E1     | 1.070173314 | 0.134134293 | 0.125338851 | A2FSG   | 0.979867538 | 0.003638782 | 0.003713545 |
| H5N4E1L1   | 3.951900687 | 0.197733609 | 0.050035065 | A2S     | 0.720584658 | 0.016349453 | 0.02268915  |
| H3N5F1E1L1 | 0.303957733 | 0.039803475 | 0.130950691 | A3S     | 0.907182614 | 0.005016555 | 0.005529818 |
| H4N4F1E2   | 0.73316873  | 0.08892241  | 0.121285055 | A4S     | 0.646919544 | 0.036395239 | 0.056259297 |
| H5N4E2     | 36.10552887 | 1.501930208 | 0.041598344 | A2F0S   | 0.896868818 | 0.008578753 | 0.009565226 |
| H5N5F1E1   | 2.053852562 | 0.069539771 | 0.03385821  | A3F0S   | 0.896886406 | 0.005551941 | 0.006190239 |
| H4N4F2L2   | 0.142568584 | 0.025570813 | 0.17935798  | A4F0S   | 0.360942183 | 0.027383919 | 0.075867882 |
| H6N5E1     | 0.484571887 | 0.032329546 | 0.06671775  | A2FS    | 0.452072148 | 0.019863928 | 0.043939729 |
| H5N4F1L2   | 0.993682761 | 0.043630936 | 0.043908316 | A3FS    | 0.920236486 | 0.005203613 | 0.005654647 |
| H4N6F1E1   | 0.714082688 | 0.06051025  | 0.084738436 | A4FS    | 0.286662755 | 0.012951608 | 0.045180643 |
| H4N4F2E1L1 | 0.437445058 | 0.025403968 | 0.058073505 | A2L     | 0.061067336 | 0.001742998 | 0.028542235 |
| H5N4F1E1L1 | 1.641815195 | 0.072228285 | 0.043992945 | A3L     | 0.270578151 | 0.004941553 | 0.018262942 |
| H4N7E1     | 0.545464254 | 0.034344452 | 0.062963709 | A4L     | 0.293359804 | 0.029151934 | 0.099372625 |
| H5N4F1E2   | 3.641336889 | 0.179461848 | 0.049284604 | A2F0L   | 0.044368542 | 0.001944699 | 0.043830579 |
| H6N5F1E1   | 0.230379094 | 0.014815902 | 0.064310967 | A3F0L   | 0.21713866  | 0.005074971 | 0.02337203  |
| H5N5E2     | 0.290083893 | 0.016809416 | 0.057946741 | A4F0L   | 0.169354609 | 0.015582436 | 0.092010699 |
| H4N5F2L2   | 0.018694696 | 0.007894997 | 0.422312123 | A2FL    | 0.086608249 | 0.00364148  | 0.042045417 |
| H6N5E1L1   | 0.515358348 | 0.027196712 | 0.052772429 | A3FL    | 0.336710099 | 0.003736993 | 0.011098547 |
| H5N5F1E2   | 2.749983681 | 0.107266273 | 0.039006149 | A4FL    | 0.124563144 | 0.014749695 | 0.118411391 |
| H6N5E2     | 0.453898924 | 0.026301861 | 0.057946516 | A2E     | 0.659726859 | 0.015896918 | 0.024096211 |
| H5N5F2L2   | 0.050780045 | 0.006546925 | 0.128927113 | A3E     | 0.636472264 | 0.002824843 | 0.004438282 |
| H7N6E1     | 0.069402598 | 0.009018023 | 0.129937831 | A4E     | 0.35334058  | 0.007542983 | 0.021347626 |
| H6N5F1L2   | 0.121106646 | 0.01052631  | 0.086917693 | A2F0E   | 0.852550903 | 0.008460337 | 0.009923557 |
| H8N7       | 0.03497838  | 0.006929806 | 0.198116847 | A3F0E   | 0.679718971 | 0.003597634 | 0.005292826 |
| H6N5F1E1L1 | 0.298133387 | 0.019025543 | 0.06381554  | A4F0E   | 0.191599096 | 0.012266386 | 0.064021105 |
| H6N5F1E2   | 0.336879994 | 0.016778787 | 0.049806422 | A2FE    | 0.365665753 | 0.017423363 | 0.047648332 |
| H6N5E1L2   | 0.495878411 | 0.040987047 | 0.082655438 | A3FE    | 0.583893962 | 0.005150446 | 0.008820858 |
| H6N5E2L1   | 2.58653207  | 0.175155942 | 0.06771845  | A4FE    | 0.161747657 | 0.005634238 | 0.034833506 |
| H6N5E3     | 1.740165337 | 0.081434013 | 0.04679671  | A2GS    | 0.804224112 | 0.010987743 | 0.013662539 |
| H6N5F1L3   | 0.132816352 | 0.013976007 | 0.105228058 | A2F0GS  | 0.917121124 | 0.006146379 | 0.006701819 |
| H7N6E2     | 0.059938347 | 0.008653509 | 0.144373494 | A4F0GS  | 0.815025775 | 0.012271978 | 0.015057165 |
| H6N5F1E1L2 | 0.445317152 | 0.046887723 | 0.105290629 | A2FGS   | 0.585897424 | 0.016306966 | 0.027832459 |
| H6N5F1E2L1 | 3.222202324 | 0.303259463 | 0.094115587 | A4FGS   | 0.949115843 | 0.003975949 | 0.004189109 |
| H9N8       | 0.096374023 | 0.022683834 | 0.235372911 | A2GL    | 0.068179656 | 0.001781861 | 0.02613479  |
| H6N5F1E3   | 0.208859186 | 0.019517426 | 0.093447775 | A2F0GL  | 0.045367012 | 0.001959376 | 0.043189443 |
| H6N5F2E2L1 | 0.117479097 | 0.015536285 | 0.132247231 | A4F0GL  | 0.382157522 | 0.013509023 | 0.035349357 |
| H7N6E1L2   | 0.173998724 | 0.031360898 | 0.180236369 | A2FGL   | 0.11224599  | 0.003442029 | 0.030665052 |
| H7N6E2L1   | 0.153479848 | 0.029127813 | 0.189782653 | A4FGL   | 0.411839745 | 0.031210124 | 0.075782205 |
| H7N6E3     | 0.039126807 | 0.008132235 | 0.207843062 | A2GE    | 0.736255077 | 0.011317159 | 0.015371247 |
| H8N7E2     | 0.016049758 | 0.005668407 | 0.353177128 | A2F0GE  | 0.87179351  | 0.006341055 | 0.007273574 |

|            |             |             |             |        |             |             |             |
|------------|-------------|-------------|-------------|--------|-------------|-------------|-------------|
| H7N6F1E1L2 | 0.133209274 | 0.028609585 | 0.214771722 | A4F0GE | 0.43271878  | 0.003577573 | 0.008267662 |
| H9N8E1     | 0.034674989 | 0.008469495 | 0.244253727 | A2FGE  | 0.473933864 | 0.015400756 | 0.032495581 |
| H7N6E1L3   | 0.146979254 | 0.036200714 | 0.246298123 | A4FGE  | 0.537104304 | 0.033911969 | 0.063138516 |
| H7N6E2L2   | 0.208953888 | 0.041337589 | 0.197831156 |        |             |             |             |
| H7N6E3L1   | 0.09646455  | 0.017750368 | 0.184009237 |        |             |             |             |
| H7N6F1E1L3 | 0.14015283  | 0.032972333 | 0.235259845 |        |             |             |             |
| H7N6F1E2L2 | 0.196518054 | 0.043297126 | 0.220321364 |        |             |             |             |
| H9N8E3     | 0.011044612 | 0.005922011 | 0.536189993 |        |             |             |             |

**Table S4. Derived N-glycan trait changes in the cohort.** IQR values of derived glycan traits in PTMC, HC, LNM, NLNM, CI, and NCI. The tendency of glycan trait alterations and p values for the comparison by Mann-Whitney U test in the cohort were listed. The p-values A considered significant are below the significance threshold of  $5.49\text{E-}4$  ( $=0.05/91$ , 91 derived glycan traits) after multiple testing corrections. The p-values B and C considered significant are below the significance threshold of 0.05 after multiple testing corrections. The p-values in bold indicated significance. PTMC, papillary thyroid microcarcinoma; HC, healthy controls; LNM, lymph node metastasis; NLNM, non-lymph node metastasis; CI, capsular invasion; NCI, non-capsular invasion.

| Traits | HC     |        |        | PTMC   |        |        | NLNM   |        |        | LNM    |        |        | NCI    |        |        | CI     |        |        | P value A          | P value B          | P value C        |
|--------|--------|--------|--------|--------|--------|--------|--------|--------|--------|--------|--------|--------|--------|--------|--------|--------|--------|--------|--------------------|--------------------|------------------|
|        | 0.25   | median | 0.75   | PTMC vs. HC        | LNM vs. NLNM       | CI vs. NCI       |
| TM     | 0.0203 | 0.0227 | 0.0251 | 0.0249 | 0.0284 | 0.0313 | 0.0245 | 0.0275 | 0.0311 | 0.0255 | 0.0290 | 0.0318 | 0.0256 | 0.0280 | 0.0309 | 0.0247 | 0.0285 | 0.0323 | <b>1.37668E-14</b> | 0.254766991        | 0.5953069        |
| THy    | 0.0126 | 0.0133 | 0.0143 | 0.0132 | 0.0143 | 0.0156 | 0.0133 | 0.0148 | 0.0161 | 0.0127 | 0.0141 | 0.0152 | 0.0129 | 0.0140 | 0.0159 | 0.0136 | 0.0145 | 0.0156 | 0.001085405        | 0.089223117        | 0.4946562        |
| MHy    | 1.4634 | 1.7240 | 1.8755 | 1.7612 | 2.0062 | 2.2056 | 1.6373 | 1.9494 | 2.1057 | 1.8546 | 2.0865 | 2.2807 | 1.7944 | 2.0328 | 2.2948 | 1.7269 | 2.0013 | 2.1644 | <b>2.3644E-09</b>  | <b>0.026546415</b> | 0.289732         |
| MM     | 6.8731 | 6.9451 | 6.9894 | 6.8296 | 6.9005 | 6.9912 | 6.8119 | 6.8579 | 6.9492 | 6.8517 | 6.9325 | 7.0216 | 6.8019 | 6.8976 | 6.9888 | 6.8508 | 6.9034 | 6.9909 | 0.09328455         | <b>0.033418778</b> | 0.4079789        |
| CA1    | 0.0087 | 0.0090 | 0.0095 | 0.0090 | 0.0096 | 0.0103 | 0.0088 | 0.0093 | 0.0101 | 0.0092 | 0.0096 | 0.0103 | 0.0091 | 0.0097 | 0.0104 | 0.0089 | 0.0094 | 0.0102 | <b>3.61143E-05</b> | 0.191197124        | 0.3419551        |
| CA2    | 0.8460 | 0.8597 | 0.8717 | 0.8308 | 0.8475 | 0.8619 | 0.8371 | 0.8557 | 0.8660 | 0.8263 | 0.8413 | 0.8596 | 0.8345 | 0.8488 | 0.8633 | 0.8305 | 0.8468 | 0.8619 | 0.001096495        | <b>0.012975594</b> | 0.5803719        |
| CA3    | 0.0928 | 0.1061 | 0.1164 | 0.1009 | 0.1122 | 0.1270 | 0.0970 | 0.1051 | 0.1236 | 0.1039 | 0.1157 | 0.1296 | 0.1010 | 0.1100 | 0.1225 | 0.1006 | 0.1129 | 0.1294 | 0.021604219        | <b>0.048514552</b> | 0.4901007        |
| CA4    | 0.0163 | 0.0184 | 0.0211 | 0.0204 | 0.0224 | 0.0261 | 0.0188 | 0.0210 | 0.0231 | 0.0213 | 0.0234 | 0.0283 | 0.0204 | 0.0224 | 0.0266 | 0.0204 | 0.0225 | 0.0247 | <b>1.26061E-08</b> | <b>0.000634221</b> | 0.7151505        |
| CF     | 0.3774 | 0.3963 | 0.4161 | 0.3739 | 0.3963 | 0.4220 | 0.3784 | 0.3965 | 0.4215 | 0.3731 | 0.3923 | 0.4217 | 0.3756 | 0.3977 | 0.4275 | 0.3734 | 0.3916 | 0.4215 | 0.84480109         | 0.671564731        | 0.3606244        |
| CFa    | 0.0090 | 0.0095 | 0.0102 | 0.0084 | 0.0090 | 0.0096 | 0.0085 | 0.0090 | 0.0095 | 0.0083 | 0.0090 | 0.0096 | 0.0083 | 0.0090 | 0.0094 | 0.0084 | 0.0091 | 0.0097 | <b>7.73242E-05</b> | 0.814381291        | 0.3878137        |
| CB     | 0.0815 | 0.0900 | 0.0992 | 0.0851 | 0.0962 | 0.1045 | 0.0861 | 0.0972 | 0.1047 | 0.0851 | 0.0958 | 0.1041 | 0.0841 | 0.0973 | 0.1081 | 0.0852 | 0.0948 | 0.1040 | 0.041246356        | 0.787299408        | 0.6104148        |
| CG     | 0.9417 | 0.9507 | 0.9630 | 0.9417 | 0.9556 | 0.9646 | 0.9410 | 0.9559 | 0.9680 | 0.9428 | 0.9547 | 0.9618 | 0.9384 | 0.9496 | 0.9590 | 0.9522 | 0.9585 | 0.9676 | 0.346522232        | 0.33875331         | <b>0.0044593</b> |
| CS     | 0.7899 | 0.8061 | 0.8302 | 0.7871 | 0.8114 | 0.8389 | 0.7807 | 0.8100 | 0.8418 | 0.7928 | 0.8115 | 0.8345 | 0.7698 | 0.7970 | 0.8345 | 0.7940 | 0.8159 | 0.8406 | 0.808922484        | 0.825278451        | <b>0.0377395</b> |
| A2F    | 0.3836 | 0.4050 | 0.4314 | 0.3867 | 0.4089 | 0.4387 | 0.3828 | 0.4132 | 0.4444 | 0.3874 | 0.4055 | 0.4305 | 0.3880 | 0.4120 | 0.4476 | 0.3871 | 0.4087 | 0.4272 | 0.469943965        | 0.66137319         | 0.3799207        |
| A3F    | 0.2579 | 0.2974 | 0.3548 | 0.2245 | 0.2774 | 0.3622 | 0.2359 | 0.2785 | 0.3412 | 0.2152 | 0.2762 | 0.3623 | 0.2276 | 0.2846 | 0.3502 | 0.2201 | 0.2762 | 0.3621 | 0.241334512        | 0.739214505        | 0.73684          |
| A4F    | 0.4485 | 0.4992 | 0.5441 | 0.4065 | 0.4678 | 0.5129 | 0.4324 | 0.4812 | 0.5115 | 0.3900 | 0.4472 | 0.5144 | 0.3946 | 0.4698 | 0.5127 | 0.4077 | 0.4620 | 0.5125 | 0.012261549        | 0.18882797         | 0.9222815        |
| A2Fa   | 0.0088 | 0.0094 | 0.0100 | 0.0082 | 0.0087 | 0.0092 | 0.0082 | 0.0087 | 0.0092 | 0.0083 | 0.0088 | 0.0093 | 0.0080 | 0.0087 | 0.0089 | 0.0083 | 0.0088 | 0.0094 | <b>3.93736E-06</b> | 0.494412128        | 0.1555949        |
| A3Fa   | 0.0037 | 0.0053 | 0.0070 | 0.0033 | 0.0052 | 0.0077 | 0.0033 | 0.0052 | 0.0077 | 0.0033 | 0.0051 | 0.0076 | 0.0035 | 0.0052 | 0.0083 | 0.0032 | 0.0052 | 0.0073 | 0.951793986        | 0.986021201        | 0.2997221        |
| A2S0F  | 0.8975 | 0.9153 | 0.9256 | 0.8870 | 0.9065 | 0.9188 | 0.8818 | 0.9024 | 0.9186 | 0.8914 | 0.9072 | 0.9182 | 0.8899 | 0.9129 | 0.9231 | 0.8852 | 0.9046 | 0.9141 | 0.016877036        | 0.379108409        | 0.1031823        |
| A2L0F  | 0.3744 | 0.3988 | 0.4260 | 0.3779 | 0.4030 | 0.4388 | 0.3760 | 0.4102 | 0.4464 | 0.3791 | 0.4004 | 0.4262 | 0.3787 | 0.4063 | 0.4481 | 0.3785 | 0.4012 | 0.4208 | 0.364506624        | 0.503309485        | 0.2641983        |



|         |        |        |        |        |        |        |        |        |        |        |        |        |        |        |        |        |        |        |                    |                    |                  |
|---------|--------|--------|--------|--------|--------|--------|--------|--------|--------|--------|--------|--------|--------|--------|--------|--------|--------|--------|--------------------|--------------------|------------------|
| A3L0F   | 0.1647 | 0.1865 | 0.1977 | 0.1568 | 0.1787 | 0.2052 | 0.1698 | 0.1823 | 0.2050 | 0.1515 | 0.1764 | 0.2054 | 0.1553 | 0.1847 | 0.2035 | 0.1595 | 0.1767 | 0.2067 | 0.682697632        | 0.291540824        | 0.6104148        |
| A4L0F   | 0.7696 | 0.8024 | 0.8350 | 0.7703 | 0.8082 | 0.8343 | 0.7734 | 0.8161 | 0.8370 | 0.7649 | 0.7979 | 0.8292 | 0.7888 | 0.8082 | 0.8281 | 0.7542 | 0.8048 | 0.8359 | 0.951793986        | 0.257702266        | 0.6883604        |
| A2E0F   | 0.8906 | 0.9077 | 0.9173 | 0.8812 | 0.9003 | 0.9106 | 0.8765 | 0.8945 | 0.9116 | 0.8857 | 0.9010 | 0.9100 | 0.8839 | 0.9034 | 0.9144 | 0.8796 | 0.8989 | 0.9082 | 0.011771536        | 0.321357119        | 0.1473513        |
| A2SF    | 0.2455 | 0.2623 | 0.2767 | 0.2482 | 0.2704 | 0.2903 | 0.2557 | 0.2729 | 0.2936 | 0.2471 | 0.2670 | 0.2868 | 0.2462 | 0.2665 | 0.2813 | 0.2541 | 0.2731 | 0.2911 | 0.036361406        | 0.31456497         | 0.3760115        |
| A2LF    | 0.4364 | 0.4609 | 0.4907 | 0.4289 | 0.4498 | 0.4817 | 0.4216 | 0.4436 | 0.4751 | 0.4306 | 0.4555 | 0.4835 | 0.4231 | 0.4447 | 0.4783 | 0.4310 | 0.4555 | 0.4840 | 0.234467097        | 0.328244335        | 0.283198         |
| A3LF    | 0.2913 | 0.3518 | 0.4248 | 0.2509 | 0.3293 | 0.4333 | 0.2641 | 0.3248 | 0.4204 | 0.2358 | 0.3314 | 0.4356 | 0.2539 | 0.3493 | 0.4269 | 0.2514 | 0.3262 | 0.4415 | 0.206309645        | 0.88022956         | 0.7043901        |
| A4LF    | 0.1850 | 0.2283 | 0.2718 | 0.1546 | 0.2086 | 0.2750 | 0.1605 | 0.2023 | 0.2706 | 0.1397 | 0.2131 | 0.2788 | 0.1560 | 0.2095 | 0.2679 | 0.1549 | 0.2025 | 0.2806 | 0.166148387        | 0.852664611        | 0.8311809        |
| A2EF    | 0.2198 | 0.2386 | 0.2541 | 0.2255 | 0.2488 | 0.2687 | 0.2324 | 0.2504 | 0.2690 | 0.2218 | 0.2454 | 0.2655 | 0.2224 | 0.2425 | 0.2597 | 0.2299 | 0.2504 | 0.2688 | 0.02193465         | 0.321357119        | 0.4588539        |
| A3EF    | 0.2371 | 0.2790 | 0.3348 | 0.2059 | 0.2591 | 0.3460 | 0.2186 | 0.2611 | 0.3204 | 0.1909 | 0.2571 | 0.3460 | 0.2081 | 0.2696 | 0.3344 | 0.2000 | 0.2571 | 0.3460 | 0.262781986        | 0.739214505        | 0.7043901        |
| A2B     | 0.0952 | 0.1032 | 0.1159 | 0.1010 | 0.1130 | 0.1235 | 0.1019 | 0.1129 | 0.1226 | 0.1006 | 0.1132 | 0.1246 | 0.0997 | 0.1132 | 0.1280 | 0.1015 | 0.1129 | 0.1220 | 0.005373169        | 0.974841045        | 0.7043901        |
| A2F0B   | 0.0278 | 0.0306 | 0.0355 | 0.0316 | 0.0342 | 0.0393 | 0.0316 | 0.0336 | 0.0393 | 0.0314 | 0.0357 | 0.0389 | 0.0305 | 0.0343 | 0.0393 | 0.0318 | 0.0342 | 0.0385 | <b>0.000206663</b> | 0.697305707        | 0.791954         |
| A2FB    | 0.1932 | 0.2142 | 0.2328 | 0.2014 | 0.2266 | 0.2460 | 0.2002 | 0.2284 | 0.2424 | 0.2018 | 0.2264 | 0.2467 | 0.2024 | 0.2174 | 0.2550 | 0.2002 | 0.2268 | 0.2444 | 0.046994648        | 0.874703837        | 0.9855856        |
| A2S0B   | 0.1701 | 0.1928 | 0.2076 | 0.1748 | 0.1934 | 0.2144 | 0.1738 | 0.1973 | 0.2042 | 0.1754 | 0.1909 | 0.2158 | 0.1728 | 0.1947 | 0.2157 | 0.1778 | 0.1931 | 0.2063 | 0.480625033        | 0.68181702         | 0.8481282        |
| A2SB    | 0.0719 | 0.0795 | 0.0931 | 0.0780 | 0.0904 | 0.1005 | 0.0791 | 0.0897 | 0.1006 | 0.0778 | 0.0911 | 0.0981 | 0.0769 | 0.0896 | 0.1023 | 0.0791 | 0.0926 | 0.0986 | 0.001588522        | 0.825278451        | 0.7808378        |
| A2F0S0B | 0.2555 | 0.2802 | 0.3173 | 0.2580 | 0.2829 | 0.3098 | 0.2569 | 0.2750 | 0.3066 | 0.2608 | 0.2907 | 0.3122 | 0.2596 | 0.2850 | 0.3119 | 0.2577 | 0.2778 | 0.3083 | 0.723272785        | 0.275806128        | 0.6567236        |
| A2F0SB  | 0.0196 | 0.0222 | 0.0257 | 0.0231 | 0.0254 | 0.0288 | 0.0225 | 0.0251 | 0.0285 | 0.0231 | 0.0261 | 0.0294 | 0.0227 | 0.0256 | 0.0284 | 0.0232 | 0.0254 | 0.0288 | <b>0.000121464</b> | 0.676683385        | 0.9395144        |
| A2FS0B  | 0.1622 | 0.1834 | 0.1973 | 0.1658 | 0.1822 | 0.1986 | 0.1652 | 0.1848 | 0.1950 | 0.1664 | 0.1797 | 0.2059 | 0.1623 | 0.1891 | 0.2092 | 0.1668 | 0.1797 | 0.1967 | 0.643019414        | 0.781912629        | 0.7477652        |
| A2FSB   | 0.2200 | 0.2445 | 0.2737 | 0.2273 | 0.2608 | 0.2945 | 0.2245 | 0.2601 | 0.2938 | 0.2337 | 0.2628 | 0.2952 | 0.2273 | 0.2679 | 0.2952 | 0.2325 | 0.2594 | 0.2938 | 0.00613299         | 0.88022956         | 0.8481282        |
| A2G     | 0.8703 | 0.8837 | 0.9020 | 0.8641 | 0.8886 | 0.9045 | 0.8634 | 0.8919 | 0.9123 | 0.8674 | 0.8878 | 0.9014 | 0.8609 | 0.8762 | 0.8988 | 0.8726 | 0.8919 | 0.9113 | 0.76244593         | 0.494412128        | <b>0.0120296</b> |
| A4G     | 0.6846 | 0.7203 | 0.7749 | 0.6951 | 0.7478 | 0.7905 | 0.6833 | 0.7314 | 0.7804 | 0.7071 | 0.7660 | 0.7930 | 0.6958 | 0.7580 | 0.7954 | 0.6954 | 0.7458 | 0.7894 | 0.019863221        | 0.153814426        | 0.5462238        |
| A2F0G   | 0.9776 | 0.9800 | 0.9832 | 0.9753 | 0.9790 | 0.9820 | 0.9752 | 0.9794 | 0.9826 | 0.9754 | 0.9781 | 0.9816 | 0.9739 | 0.9774 | 0.9806 | 0.9755 | 0.9794 | 0.9826 | 0.031520578        | 0.601588502        | 0.1598457        |
| A4F0G   | 0.4551 | 0.5000 | 0.5503 | 0.4848 | 0.5283 | 0.5908 | 0.4877 | 0.5164 | 0.5662 | 0.4794 | 0.5516 | 0.6080 | 0.4814 | 0.5235 | 0.6035 | 0.4849 | 0.5369 | 0.5881 | 0.015847633        | 0.210941926        | 0.9337665        |
| A2FG    | 0.7178 | 0.7450 | 0.7814 | 0.7218 | 0.7607 | 0.7853 | 0.7187 | 0.7641 | 0.8032 | 0.7232 | 0.7596 | 0.7791 | 0.7088 | 0.7334 | 0.7718 | 0.7428 | 0.7668 | 0.8043 | 0.241334512        | 0.237643764        | <b>0.0030116</b> |
| A2S0G   | 0.4759 | 0.5156 | 0.5497 | 0.4958 | 0.5252 | 0.5684 | 0.4971 | 0.5447 | 0.5757 | 0.4940 | 0.5210 | 0.5534 | 0.4872 | 0.5105 | 0.5359 | 0.5071 | 0.5447 | 0.5764 | 0.167030782        | 0.179567678        | <b>0.0144357</b> |
| A2SG    | 0.9889 | 0.9898 | 0.9914 | 0.9873 | 0.9895 | 0.9907 | 0.9879 | 0.9893 | 0.9906 | 0.9873 | 0.9898 | 0.9910 | 0.9865 | 0.9883 | 0.9906 | 0.9881 | 0.9897 | 0.9909 | 0.017549814        | 0.666461264        | 0.1731252        |
| A2F0S0G | 0.5469 | 0.5782 | 0.6032 | 0.5511 | 0.5904 | 0.6093 | 0.5737 | 0.5986 | 0.6219 | 0.5435 | 0.5783 | 0.5983 | 0.5395 | 0.5748 | 0.5957 | 0.5605 | 0.5942 | 0.6177 | 0.477050052        | <b>0.007347482</b> | 0.05688          |

|        |        |        |        |        |        |        |        |        |        |        |        |        |        |        |        |        |        |        |             |                    |                  |
|--------|--------|--------|--------|--------|--------|--------|--------|--------|--------|--------|--------|--------|--------|--------|--------|--------|--------|--------|-------------|--------------------|------------------|
| A2FS0G | 0.4692 | 0.5082 | 0.5429 | 0.4890 | 0.5178 | 0.5656 | 0.4908 | 0.5334 | 0.5716 | 0.4884 | 0.5170 | 0.5511 | 0.4813 | 0.5066 | 0.5301 | 0.4958 | 0.5334 | 0.5731 | 0.171495646 | 0.25185505         | <b>0.0138671</b> |
| A2F0SG | 0.9934 | 0.9939 | 0.9946 | 0.9927 | 0.9936 | 0.9946 | 0.9929 | 0.9938 | 0.9945 | 0.9925 | 0.9934 | 0.9946 | 0.9925 | 0.9932 | 0.9945 | 0.9929 | 0.9939 | 0.9946 | 0.089418741 | 0.902388173        | 0.1433568        |
| A2FSG  | 0.9756 | 0.9792 | 0.9829 | 0.9726 | 0.9777 | 0.9820 | 0.9721 | 0.9778 | 0.9821 | 0.9728 | 0.9777 | 0.9820 | 0.9698 | 0.9752 | 0.9813 | 0.9739 | 0.9783 | 0.9824 | 0.024740069 | 0.760472347        | 0.1535019        |
| A2S    | 0.6691 | 0.6883 | 0.7122 | 0.6553 | 0.6870 | 0.7127 | 0.6531 | 0.6868 | 0.7194 | 0.6592 | 0.6872 | 0.7121 | 0.6420 | 0.6712 | 0.7107 | 0.6697 | 0.6923 | 0.7129 | 0.421873205 | 0.836209382        | 0.0669566        |
| A3S    | 0.8921 | 0.8992 | 0.9078 | 0.8963 | 0.9029 | 0.9111 | 0.8923 | 0.9001 | 0.9087 | 0.8988 | 0.9056 | 0.9127 | 0.8977 | 0.9035 | 0.9129 | 0.8946 | 0.9016 | 0.9105 | 0.039559657 | <b>0.035818439</b> | 0.3721272        |
| A4S    | 0.5848 | 0.6174 | 0.6680 | 0.6046 | 0.6516 | 0.6896 | 0.5954 | 0.6374 | 0.6820 | 0.6188 | 0.6569 | 0.6957 | 0.6061 | 0.6722 | 0.6981 | 0.6039 | 0.6435 | 0.6820 | 0.00546931  | 0.210941926        | 0.2641983        |
| A2F0S  | 0.8907 | 0.8981 | 0.9051 | 0.8803 | 0.8918 | 0.9009 | 0.8805 | 0.8895 | 0.8995 | 0.8812 | 0.8918 | 0.9022 | 0.8788 | 0.8908 | 0.8978 | 0.8835 | 0.8918 | 0.9024 | 0.00176997  | 0.692128393        | 0.3493474        |
| A3F0S  | 0.8902 | 0.9021 | 0.9122 | 0.8974 | 0.9061 | 0.9156 | 0.8943 | 0.9055 | 0.9128 | 0.8975 | 0.9085 | 0.9166 | 0.8994 | 0.9080 | 0.9171 | 0.8971 | 0.9046 | 0.9154 | 0.066261195 | 0.181850474        | 0.3799207        |
| A4F0S  | 0.3628 | 0.4083 | 0.4629 | 0.3951 | 0.4412 | 0.5004 | 0.4026 | 0.4270 | 0.4723 | 0.3915 | 0.4656 | 0.5064 | 0.3947 | 0.4392 | 0.5193 | 0.4060 | 0.4431 | 0.4940 | 0.005869592 | 0.257702266        | 0.7422961        |
| A2FS   | 0.3622 | 0.3918 | 0.4182 | 0.3574 | 0.3945 | 0.4242 | 0.3575 | 0.3995 | 0.4241 | 0.3581 | 0.3897 | 0.4221 | 0.3413 | 0.3657 | 0.4162 | 0.3630 | 0.4026 | 0.4276 | 0.771238436 | 0.749819673        | <b>0.0159481</b> |
| A3FS   | 0.8787 | 0.8931 | 0.9068 | 0.8734 | 0.8966 | 0.9084 | 0.8697 | 0.8942 | 0.9073 | 0.8787 | 0.8969 | 0.9113 | 0.8854 | 0.8973 | 0.9120 | 0.8707 | 0.8958 | 0.9081 | 0.500545807 | 0.345877931        | 0.3493474        |
| A4FS   | 0.1846 | 0.2082 | 0.2287 | 0.1729 | 0.1956 | 0.2339 | 0.1791 | 0.1954 | 0.2327 | 0.1635 | 0.1998 | 0.2373 | 0.1756 | 0.2063 | 0.2292 | 0.1730 | 0.1944 | 0.2369 | 0.270215108 | 0.651244028        | 0.8311809        |
| A2L    | 0.0573 | 0.0618 | 0.0645 | 0.0560 | 0.0594 | 0.0643 | 0.0555 | 0.0594 | 0.0645 | 0.0562 | 0.0594 | 0.0625 | 0.0566 | 0.0587 | 0.0630 | 0.0560 | 0.0598 | 0.0644 | 0.09328455  | 0.666461264        | 0.6205803        |
| A3L    | 0.2603 | 0.2700 | 0.2783 | 0.2625 | 0.2717 | 0.2803 | 0.2625 | 0.2722 | 0.2802 | 0.2622 | 0.2716 | 0.2803 | 0.2679 | 0.2725 | 0.2826 | 0.2609 | 0.2696 | 0.2793 | 0.336296909 | 0.841686872        | 0.117682         |
| A4L    | 0.2354 | 0.2694 | 0.3030 | 0.2592 | 0.2924 | 0.3231 | 0.2589 | 0.2837 | 0.3175 | 0.2635 | 0.2988 | 0.3276 | 0.2562 | 0.3123 | 0.3363 | 0.2593 | 0.2863 | 0.3175 | 0.005973702 | 0.285175993        | 0.16861          |
| A2F0L  | 0.0437 | 0.0472 | 0.0506 | 0.0433 | 0.0471 | 0.0509 | 0.0457 | 0.0494 | 0.0522 | 0.0425 | 0.0457 | 0.0500 | 0.0440 | 0.0485 | 0.0514 | 0.0431 | 0.0467 | 0.0508 | 0.979330007 | 0.053509817        | 0.3099393        |
| A3F0L  | 0.2206 | 0.2378 | 0.2496 | 0.2229 | 0.2436 | 0.2543 | 0.2249 | 0.2459 | 0.2521 | 0.2215 | 0.2385 | 0.2554 | 0.2289 | 0.2459 | 0.2567 | 0.2214 | 0.2414 | 0.2517 | 0.103842758 | 0.68181702         | 0.2550357        |
| A4F0L  | 0.1690 | 0.1929 | 0.2291 | 0.1891 | 0.2166 | 0.2475 | 0.1893 | 0.2078 | 0.2356 | 0.1853 | 0.2242 | 0.2576 | 0.1894 | 0.2133 | 0.2660 | 0.1889 | 0.2167 | 0.2424 | 0.003920066 | 0.321357119        | 0.541428         |
| A2FL   | 0.0742 | 0.0820 | 0.0912 | 0.0700 | 0.0789 | 0.0880 | 0.0690 | 0.0790 | 0.0880 | 0.0725 | 0.0789 | 0.0873 | 0.0680 | 0.0776 | 0.0855 | 0.0722 | 0.0815 | 0.0890 | 0.070627521 | 0.66137319         | 0.258065         |
| A3FL   | 0.3356 | 0.3456 | 0.3539 | 0.3368 | 0.3460 | 0.3530 | 0.3377 | 0.3445 | 0.3528 | 0.3362 | 0.3462 | 0.3531 | 0.3355 | 0.3462 | 0.3520 | 0.3377 | 0.3457 | 0.3532 | 0.740600621 | 0.666461264        | 0.753247         |
| A4FL   | 0.0585 | 0.0684 | 0.0835 | 0.0511 | 0.0698 | 0.0898 | 0.0510 | 0.0721 | 0.0866 | 0.0516 | 0.0688 | 0.0935 | 0.0533 | 0.0725 | 0.0896 | 0.0479 | 0.0688 | 0.0900 | 0.981626242 | 0.913497171        | 0.6359649        |
| A2E    | 0.6072 | 0.6279 | 0.6482 | 0.5965 | 0.6271 | 0.6523 | 0.5975 | 0.6269 | 0.6542 | 0.5957 | 0.6292 | 0.6518 | 0.5867 | 0.6101 | 0.6505 | 0.6098 | 0.6319 | 0.6526 | 0.616437802 | 0.755140189        | 0.0578272        |
| A3E    | 0.6222 | 0.6289 | 0.6396 | 0.6210 | 0.6334 | 0.6431 | 0.6208 | 0.6293 | 0.6367 | 0.6234 | 0.6364 | 0.6444 | 0.6209 | 0.6311 | 0.6391 | 0.6214 | 0.6335 | 0.6439 | 0.477050052 | 0.054382751        | 0.4120856        |
| A4E    | 0.3453 | 0.3536 | 0.3631 | 0.3456 | 0.3569 | 0.3678 | 0.3429 | 0.3509 | 0.3675 | 0.3485 | 0.3611 | 0.3680 | 0.3458 | 0.3551 | 0.3666 | 0.3455 | 0.3579 | 0.3683 | 0.116664859 | 0.106221804        | 0.6359649        |
| A2F0E  | 0.8414 | 0.8495 | 0.8581 | 0.8313 | 0.8464 | 0.8545 | 0.8318 | 0.8476 | 0.8522 | 0.8311 | 0.8460 | 0.8584 | 0.8265 | 0.8460 | 0.8543 | 0.8341 | 0.8468 | 0.8554 | 0.02032545  | 0.360411262        | 0.3382968        |
| A3F0E  | 0.6544 | 0.6641 | 0.6770 | 0.6524 | 0.6645 | 0.6789 | 0.6521 | 0.6616 | 0.6693 | 0.6531 | 0.6703 | 0.6804 | 0.6508 | 0.6614 | 0.6725 | 0.6529 | 0.6650 | 0.6797 | 0.820095224 | 0.145885331        | 0.4120856        |

|        |        |        |        |        |        |        |        |        |        |        |        |        |        |        |        |        |        |        |             |             |                  |
|--------|--------|--------|--------|--------|--------|--------|--------|--------|--------|--------|--------|--------|--------|--------|--------|--------|--------|--------|-------------|-------------|------------------|
| A4F0E  | 0.1959 | 0.2163 | 0.2397 | 0.2064 | 0.2230 | 0.2532 | 0.2068 | 0.2176 | 0.2452 | 0.2061 | 0.2297 | 0.2574 | 0.2062 | 0.2221 | 0.2544 | 0.2068 | 0.2231 | 0.2512 | 0.02996222  | 0.221349931 | 0.8424709        |
| A2FE   | 0.2797 | 0.3067 | 0.3319 | 0.2846 | 0.3152 | 0.3391 | 0.2857 | 0.3245 | 0.3394 | 0.2843 | 0.3126 | 0.3370 | 0.2703 | 0.2907 | 0.3318 | 0.2880 | 0.3251 | 0.3460 | 0.245990737 | 0.582216024 | <b>0.0147277</b> |
| A3FE   | 0.5346 | 0.5463 | 0.5649 | 0.5289 | 0.5487 | 0.5667 | 0.5282 | 0.5483 | 0.5641 | 0.5292 | 0.5492 | 0.5696 | 0.5304 | 0.5517 | 0.5660 | 0.5282 | 0.5483 | 0.5695 | 0.970146972 | 0.636170725 | 0.8199256        |
| A4FE   | 0.1214 | 0.1393 | 0.1502 | 0.1139 | 0.1294 | 0.1432 | 0.1214 | 0.1297 | 0.1432 | 0.1079 | 0.1262 | 0.1444 | 0.1088 | 0.1315 | 0.1440 | 0.1155 | 0.1293 | 0.1423 | 0.027444648 | 0.328244335 | 0.8993623        |
| A2GS   | 0.7652 | 0.7822 | 0.7935 | 0.7564 | 0.7773 | 0.7981 | 0.7556 | 0.7683 | 0.7931 | 0.7574 | 0.7778 | 0.8009 | 0.7449 | 0.7661 | 0.7932 | 0.7598 | 0.7784 | 0.8007 | 0.23220902  | 0.39060793  | 0.258065         |
| A2F0GS | 0.9098 | 0.9154 | 0.9209 | 0.9024 | 0.9117 | 0.9182 | 0.9023 | 0.9117 | 0.9160 | 0.9038 | 0.9117 | 0.9192 | 0.9018 | 0.9118 | 0.9158 | 0.9039 | 0.9117 | 0.9183 | 0.002008884 | 0.516812447 | 0.6777507        |
| A4F0GS | 0.7984 | 0.8239 | 0.8390 | 0.8149 | 0.8327 | 0.8445 | 0.8178 | 0.8336 | 0.8410 | 0.8116 | 0.8327 | 0.8511 | 0.8214 | 0.8363 | 0.8568 | 0.8134 | 0.8306 | 0.8411 | 0.00546931  | 0.712921574 | 0.0847864        |
| A2FGS  | 0.4976 | 0.5221 | 0.5467 | 0.4898 | 0.5214 | 0.5505 | 0.4887 | 0.5199 | 0.5565 | 0.4951 | 0.5253 | 0.5481 | 0.4804 | 0.5105 | 0.5476 | 0.4984 | 0.5276 | 0.5536 | 0.915174281 | 0.930191731 | 0.117682         |
| A4FGS  | 0.9590 | 0.9633 | 0.9683 | 0.9560 | 0.9622 | 0.9690 | 0.9559 | 0.9639 | 0.9708 | 0.9561 | 0.9613 | 0.9686 | 0.9577 | 0.9629 | 0.9670 | 0.9559 | 0.9617 | 0.9696 | 0.590349786 | 0.530500705 | 0.870833         |
| A2GL   | 0.0660 | 0.0693 | 0.0726 | 0.0637 | 0.0677 | 0.0707 | 0.0639 | 0.0681 | 0.0712 | 0.0634 | 0.0667 | 0.0706 | 0.0650 | 0.0676 | 0.0699 | 0.0628 | 0.0680 | 0.0712 | 0.020481598 | 0.521354785 | 0.9740573        |
| A2F0GL | 0.0446 | 0.0480 | 0.0516 | 0.0442 | 0.0481 | 0.0518 | 0.0465 | 0.0504 | 0.0532 | 0.0435 | 0.0468 | 0.0511 | 0.0451 | 0.0495 | 0.0526 | 0.0441 | 0.0476 | 0.0516 | 0.906044363 | 0.06581584  | 0.2864524        |
| A4F0GL | 0.3700 | 0.3943 | 0.4097 | 0.3802 | 0.4037 | 0.4253 | 0.3825 | 0.4078 | 0.4237 | 0.3784 | 0.4032 | 0.4274 | 0.3865 | 0.4150 | 0.4390 | 0.3784 | 0.4013 | 0.4168 | 0.02127813  | 0.858164342 | 0.0943316        |
| A2FGL  | 0.1003 | 0.1108 | 0.1199 | 0.0928 | 0.1051 | 0.1148 | 0.0896 | 0.1036 | 0.1129 | 0.0936 | 0.1071 | 0.1163 | 0.0912 | 0.1061 | 0.1142 | 0.0930 | 0.1043 | 0.1147 | 0.010577847 | 0.33875331  | 0.7205521        |
| A4FGL  | 0.2940 | 0.3184 | 0.3708 | 0.2739 | 0.3441 | 0.3954 | 0.2670 | 0.3358 | 0.3948 | 0.2744 | 0.3501 | 0.3972 | 0.2971 | 0.3416 | 0.3988 | 0.2626 | 0.3467 | 0.3876 | 0.342115946 | 0.626204413 | 0.3419551        |
| A2GE   | 0.6960 | 0.7112 | 0.7228 | 0.6869 | 0.7105 | 0.7285 | 0.6877 | 0.7058 | 0.7250 | 0.6851 | 0.7143 | 0.7295 | 0.6784 | 0.6990 | 0.7265 | 0.6900 | 0.7113 | 0.7285 | 0.44553917  | 0.328244335 | 0.2460963        |
| A2F0GE | 0.8593 | 0.8668 | 0.8746 | 0.8501 | 0.8628 | 0.8730 | 0.8493 | 0.8605 | 0.8703 | 0.8514 | 0.8656 | 0.8749 | 0.8473 | 0.8654 | 0.8721 | 0.8550 | 0.8625 | 0.8739 | 0.039010595 | 0.237643764 | 0.4038966        |
| A4F0GE | 0.4208 | 0.4276 | 0.4374 | 0.4183 | 0.4261 | 0.4375 | 0.4169 | 0.4223 | 0.4330 | 0.4189 | 0.4290 | 0.4382 | 0.4158 | 0.4251 | 0.4350 | 0.4200 | 0.4276 | 0.4379 | 0.43700139  | 0.196000919 | 0.2963668        |
| A2FGE  | 0.3889 | 0.4093 | 0.4282 | 0.3899 | 0.4178 | 0.4414 | 0.3878 | 0.4174 | 0.4470 | 0.3949 | 0.4183 | 0.4372 | 0.3764 | 0.4059 | 0.4399 | 0.3959 | 0.4217 | 0.4435 | 0.257905713 | 0.825278451 | 0.1001615        |
| A4FGE  | 0.5885 | 0.6447 | 0.6681 | 0.5630 | 0.6174 | 0.6939 | 0.5619 | 0.6265 | 0.6972 | 0.5635 | 0.6098 | 0.6917 | 0.5577 | 0.6192 | 0.6598 | 0.5671 | 0.6156 | 0.7027 | 0.32062506  | 0.601588502 | 0.3998389        |
